# Supplementary material
Source: MDPI journal article supplement (https://www.mdpi.com/2674-0516/3/2/16)
Supplement: s1 [file s1]

Archive with 2 entries (2 files):
- Peukert-SI1-PP2045.pdf
- Peukert-SI2-raw-data-PP2045.xlsx
