# Supplementary material
Source: MDPI journal article supplement (https://www.mdpi.com/2674-0516/3/2/16)
Supplement: s1 [file s1 › Peukert-SI2-raw-data-PP2045.xlsx]

## Sheet: Tabelle1
UV/Vis spectra of the molybdenum disulfide nanosheet fractions
Fraction-300nm			Fraction-250nm			Fraction-200nm			Fraction-150nm			Fraction-100nm			Fraction-75nm			Fraction-50nm
Dilution=1:10			Dilution=1:10			Dilution=1:10			Dilution=1:5			Dilution=1:5			Dilution=1:4			Dilution=1:4
wavelength/nm	extinction		wavelength/nm	extinction		wavelength/nm	extinction		wavelength/nm	extinction		wavelength/nm	extinction		wavelength/nm	extinction		wavelength/nm	extinction
800	0.11822		800	0.08071		800	0.06278		800	0.085		800	0.05798		800	0.07165		800	0.05559
799	0.11965		799	0.08078		799	0.06349		799	0.08571		799	0.05799		799	0.07222		799	0.05649
798	0.11858		798	0.08128		798	0.06348		798	0.08578		798	0.05828		798	0.07262		798	0.0558
797	0.11964		797	0.08185		797	0.06369		797	0.08621		797	0.05779		797	0.07278		797	0.05657
796	0.11996		796	0.08188		796	0.06383		796	0.08705		796	0.05868		796	0.07243		796	0.05646
795	0.12085		795	0.08265		795	0.06438		795	0.08607		795	0.05843		795	0.07309		795	0.05602
794	0.12128		794	0.08331		794	0.0653		794	0.08792		794	0.05933		794	0.07363		794	0.05718
793	0.12152		793	0.08322		793	0.06505		793	0.08736		793	0.05859		793	0.07321		793	0.05719
792	0.1218		792	0.08405		792	0.06574		792	0.08824		792	0.05907		792	0.07321		792	0.05705
791	0.12228		791	0.08411		791	0.06557		791	0.08816		791	0.05889		791	0.07417		791	0.05794
790	0.1223		790	0.08365		790	0.06549		790	0.08833		790	0.05963		790	0.07355		790	0.05816
789	0.12291		789	0.0851		789	0.06578		789	0.08862		789	0.05989		789	0.07437		789	0.05759
788	0.12309		788	0.0857		788	0.06642		788	0.08895		788	0.05995		788	0.0746		788	0.05829
787	0.1245		787	0.08534		787	0.06735		787	0.08961		787	0.06031		787	0.07475		787	0.0581
786	0.12496		786	0.08675		786	0.06704		786	0.0898		786	0.06066		786	0.07447		786	0.05874
785	0.1254		785	0.08629		785	0.06722		785	0.09032		785	0.06022		785	0.07485		785	0.05802
784	0.12711		784	0.08614		784	0.06764		784	0.0905		784	0.06061		784	0.07571		784	0.05873
783	0.12658		783	0.08757		783	0.06758		783	0.09111		783	0.06105		783	0.07534		783	0.05869
782	0.12742		782	0.08763		782	0.06801		782	0.09032		782	0.06042		782	0.07551		782	0.05896
781	0.12808		781	0.08839		781	0.06875		781	0.09141		781	0.06118		781	0.07638		781	0.05918
780	0.12849		780	0.08845		780	0.06929		780	0.09153		780	0.06165		780	0.07635		780	0.05939
779	0.12927		779	0.08808		779	0.06885		779	0.09173		779	0.06163		779	0.07567		779	0.05903
778	0.13016		778	0.09		778	0.06945		778	0.09235		778	0.06136		778	0.07701		778	0.05999
777	0.1298		777	0.08934		777	0.0697		777	0.09334		777	0.06221		777	0.07752		777	0.06044
776	0.13052		776	0.09059		776	0.07007		776	0.09205		776	0.06169		776	0.0765		776	0.05938
775	0.13156		775	0.09065		775	0.06994		775	0.09287		775	0.06219		775	0.07714		775	0.05928
774	0.13244		774	0.09052		774	0.0701		774	0.09399		774	0.0617		774	0.07684		774	0.06003
773	0.13262		773	0.09116		773	0.07108		773	0.09379		773	0.06273		773	0.07809		773	0.06044
772	0.13275		772	0.09166		772	0.07167		772	0.09459		772	0.06239		772	0.07748		772	0.06054
771	0.13362		771	0.09164		771	0.07153		771	0.09462		771	0.06268		771	0.078		771	0.06068
770	0.13397		770	0.09308		770	0.07194		770	0.09443		770	0.06327		770	0.07813		770	0.06087
769	0.13463		769	0.09311		769	0.07258		769	0.09575		769	0.06394		769	0.07911		769	0.06132
768	0.13479		768	0.09361		768	0.07159		768	0.0957		768	0.06287		768	0.07782		768	0.06098
767	0.13578		767	0.09423		767	0.07312		767	0.09608		767	0.06339		767	0.07879		767	0.06138
766	0.13708		766	0.09437		766	0.07285		766	0.0965		766	0.06334		766	0.07872		766	0.06093
765	0.13751		765	0.09523		765	0.07369		765	0.09647		765	0.06448		765	0.07926		765	0.06217
764	0.13747		764	0.09459		764	0.07288		764	0.09694		764	0.06383		764	0.07888		764	0.06099
763	0.13957		763	0.09598		763	0.07419		763	0.09724		763	0.06476		763	0.08008		763	0.06167
762	0.13977		762	0.0963		762	0.07545		762	0.0985		762	0.06489		762	0.07995		762	0.06185
761	0.14045		761	0.0973		761	0.07484		761	0.09827		761	0.06485		761	0.0798		761	0.06251
760	0.14131		760	0.09689		760	0.0755		760	0.09873		760	0.06521		760	0.08068		760	0.06279
759	0.14164		759	0.09851		759	0.07548		759	0.09933		759	0.06497		759	0.08078		759	0.06317
758	0.1422		758	0.09891		758	0.07622		758	0.09939		758	0.06551		758	0.08105		758	0.06289
757	0.14318		757	0.09871		757	0.07627		757	0.09976		757	0.06581		757	0.08094		757	0.06315
756	0.14388		756	0.09938		756	0.07644		756	0.10034		756	0.06563		756	0.08163		756	0.06332
755	0.14398		755	0.09956		755	0.0769		755	0.10016		755	0.06543		755	0.0807		755	0.06301
754	0.14492		754	0.10052		754	0.07726		754	0.10041		754	0.06626		754	0.08171		754	0.06376
753	0.14592		753	0.10138		753	0.07799		753	0.10177		753	0.06587		753	0.08193		753	0.06368
752	0.14715		752	0.1017		752	0.07894		752	0.1016		752	0.0668		752	0.08262		752	0.0637
751	0.1481		751	0.10279		751	0.07873		751	0.1027		751	0.06704		751	0.08308		751	0.06415
750	0.14816		750	0.10258		750	0.07878		750	0.10226		750	0.06575		750	0.0822		750	0.06376
749	0.14968		749	0.10381		749	0.08002		749	0.1039		749	0.06784		749	0.08407		749	0.0648
748	0.14972		748	0.10482		748	0.08014		748	0.10387		748	0.0678		748	0.0832		748	0.06494
747	0.15127		747	0.10494		747	0.08024		747	0.1042		747	0.06762		747	0.08352		747	0.06542
746	0.1514		746	0.10559		746	0.08126		746	0.10487		746	0.06802		746	0.08416		746	0.06535
745	0.15281		745	0.10616		745	0.0806		745	0.10491		745	0.06825		745	0.08404		745	0.06594
744	0.15309		744	0.10649		744	0.08177		744	0.10612		744	0.06855		744	0.08472		744	0.06558
743	0.15475		743	0.10757		743	0.08261		743	0.1055		743	0.06881		743	0.08449		743	0.06589
742	0.15539		742	0.108		742	0.08209		742	0.10693		742	0.06879		742	0.0853		742	0.06664
741	0.15636		741	0.10842		741	0.08204		741	0.10732		741	0.06881		741	0.08445		741	0.06572
740	0.15647		740	0.10844		740	0.08382		740	0.10725		740	0.06927		740	0.08461		740	0.06598
739	0.15791		739	0.1096		739	0.0836		739	0.10741		739	0.06965		739	0.08611		739	0.06624
738	0.15832		738	0.11083		738	0.08448		738	0.10891		738	0.07028		738	0.08594		738	0.06693
737	0.15942		737	0.11078		737	0.08525		737	0.10851		737	0.07001		737	0.08616		737	0.06633
736	0.1615		736	0.11222		736	0.08551		736	0.10962		736	0.07049		736	0.08674		736	0.06755
735	0.16132		735	0.11256		735	0.08627		735	0.11011		735	0.07049		735	0.08675		735	0.06733
734	0.16297		734	0.11337		734	0.08612		734	0.11125		734	0.07127		734	0.087		734	0.06746
733	0.16368		733	0.11488		733	0.08779		733	0.11165		733	0.0719		733	0.08802		733	0.06814
732	0.16558		732	0.11475		732	0.08696		732	0.11125		732	0.0718		732	0.08754		732	0.06739
731	0.16581		731	0.11645		731	0.08863		731	0.11269		731	0.07176		731	0.08789		731	0.06824
730	0.16779		730	0.11669		730	0.08854		730	0.11283		730	0.07166		730	0.08803		730	0.06898
729	0.16906		729	0.11734		729	0.09007		729	0.11433		729	0.07307		729	0.08908		729	0.06923
728	0.16973		728	0.11781		728	0.08938		728	0.11351		728	0.07236		728	0.08841		728	0.06814
727	0.17147		727	0.11939		727	0.09165		727	0.11524		727	0.07307		727	0.08918		727	0.06927
726	0.17185		726	0.11944		726	0.0914		726	0.11559		726	0.07302		726	0.08886		726	0.06914
725	0.1733		725	0.12098		725	0.09232		725	0.11657		725	0.07357		725	0.08968		725	0.07012
724	0.1748		724	0.12208		724	0.0923		724	0.11701		724	0.0737		724	0.09001		724	0.06936
723	0.17624		723	0.12258		723	0.09341		723	0.11792		723	0.07409		723	0.0905		723	0.07
722	0.17722		722	0.12468		722	0.09414		722	0.11892		722	0.07483		722	0.0905		722	0.07064
721	0.17887		721	0.12487		721	0.09399		721	0.11926		721	0.07465		721	0.09133		721	0.07028
720	0.17992		720	0.12554		720	0.09541		720	0.11983		720	0.07573		720	0.09223		720	0.07116
719	0.18138		719	0.12757		719	0.09607		719	0.12101		719	0.07583		719	0.09213		719	0.07092
718	0.18393		718	0.12942		718	0.09735		718	0.1218		718	0.07601		718	0.09283		718	0.07154
717	0.18443		717	0.12967		717	0.09822		717	0.12285		717	0.07652		717	0.09276		717	0.07139
716	0.18586		716	0.13071		716	0.09886		716	0.1237		716	0.07642		716	0.09339		716	0.07215
715	0.18763		715	0.13161		715	0.09996		715	0.12444		715	0.07668		715	0.09376		715	0.07214
714	0.18923		714	0.13279		714	0.09973		714	0.12536		714	0.07778		714	0.0934		714	0.0719
713	0.1907		713	0.13452		713	0.10108		713	0.12671		713	0.07789		713	0.09457		713	0.07232
712	0.19291		712	0.13568		712	0.10313		712	0.12786		712	0.07871		712	0.09478		712	0.07307
711	0.19481		711	0.13752		711	0.10368		711	0.12796		711	0.07908		711	0.09539		711	0.07364
710	0.19638		710	0.13844		710	0.10419		710	0.12908		710	0.07881		710	0.09592		710	0.07406
709	0.19899		709	0.13979		709	0.10582		709	0.13058		709	0.08004		709	0.09691		709	0.07407
708	0.20115		708	0.14204		708	0.10639		708	0.13093		708	0.08065		708	0.09679		708	0.07451
707	0.20283		707	0.14305		707	0.1087		707	0.13295		707	0.08109		707	0.09774		707	0.07442
706	0.20565		706	0.14498		706	0.10877		706	0.13344		706	0.08126		706	0.09765		706	0.07446
705	0.20734		705	0.14697		705	0.1107		705	0.13533		705	0.08221		705	0.09827		705	0.07559
704	0.20958		704	0.14806		704	0.11153		704	0.13733		704	0.08202		704	0.09788		704	0.07517
703	0.21228		703	0.15051		703	0.11251		703	0.13795		703	0.08261		703	0.09918		703	0.07587
702	0.21599		702	0.15246		702	0.11553		702	0.14005		702	0.08388		702	0.09984		702	0.07608
701	0.21768		701	0.15432		701	0.11604		701	0.1413		701	0.08417		701	0.1004		701	0.07654
700	0.22171		700	0.15687		700	0.11815		700	0.14295		700	0.08488		700	0.10121		700	0.0771
699	0.22403		699	0.15973		699	0.11973		699	0.14489		699	0.08569		699	0.10114		699	0.07684
698	0.22811		698	0.16249		698	0.12122		698	0.14783		698	0.08694		698	0.10313		698	0.07766
697	0.23114		697	0.16534		697	0.123		697	0.14855		697	0.08688		697	0.10322		697	0.07777
696	0.23504		696	0.16768		696	0.12577		696	0.15211		696	0.08878		696	0.10383		696	0.07914
695	0.23759		695	0.16988		695	0.127		695	0.15321		695	0.08838		695	0.10438		695	0.07836
694	0.24254		694	0.17328		694	0.1301		694	0.15687		694	0.09014		694	0.10515		694	0.07951
693	0.24729		693	0.17703		693	0.13199		693	0.15922		693	0.09095		693	0.10641		693	0.0803
692	0.25183		692	0.18121		692	0.13604		692	0.16225		692	0.09235		692	0.1077		692	0.08051
691	0.25652		691	0.18461		691	0.13834		691	0.16534		691	0.09378		691	0.10798		691	0.08084
690	0.26207		690	0.18954		690	0.1416		690	0.16884		690	0.09508		690	0.11019		690	0.082
689	0.26723		689	0.1937		689	0.14429		689	0.17231		689	0.09657		689	0.11117		689	0.08151
688	0.27331		688	0.19822		688	0.14791		688	0.17585		688	0.09762		688	0.11181		688	0.08232
687	0.28017		687	0.20371		687	0.15245		687	0.18146		687	0.09902		687	0.11343		687	0.08384
686	0.28577		686	0.20804		686	0.15564		686	0.18403		686	0.10053		686	0.11475		686	0.0842
685	0.29287		685	0.21446		685	0.16048		685	0.18935		685	0.10313		685	0.1165		685	0.08498
684	0.30029		684	0.21965		684	0.1651		684	0.1949		684	0.1041		684	0.11751		684	0.08493
683	0.30739		683	0.22504		683	0.16943		683	0.19947		683	0.1074		683	0.11965		683	0.08594
682	0.315		682	0.23161		682	0.17489		682	0.20497		682	0.10855		682	0.12079		682	0.08667
681	0.32372		681	0.23955		681	0.18029		681	0.21213		681	0.11128		681	0.12325		681	0.0881
680	0.33118		680	0.24542		680	0.18513		680	0.21792		680	0.1137		680	0.12512		680	0.08801
679	0.3401		679	0.25243		679	0.19153		679	0.22468		679	0.11612		679	0.12611		679	0.08907
678	0.34685		678	0.25977		678	0.19594		678	0.2317		678	0.1193		678	0.12901		678	0.09056
677	0.35562		677	0.26591		677	0.20258		677	0.23873		677	0.12167		677	0.13127		677	0.0912
676	0.36336		676	0.27268		676	0.20764		676	0.24598		676	0.12463		676	0.13337		676	0.09273
675	0.37062		675	0.27949		675	0.21329		675	0.25248		675	0.12772		675	0.13591		675	0.09362
674	0.37676		674	0.28488		674	0.21815		674	0.25986		674	0.13099		674	0.13864		674	0.09542
673	0.38282		673	0.29013		673	0.22338		673	0.26667		673	0.13389		673	0.14175		673	0.09642
672	0.38735		672	0.29444		672	0.22743		672	0.27292		672	0.13693		672	0.14338		672	0.09699
671	0.39273		671	0.2993		671	0.23149		671	0.28017		671	0.14047		671	0.14633		671	0.09822
670	0.39609		670	0.30291		670	0.23545		670	0.28461		670	0.14315		670	0.14941		670	0.09942
669	0.39872		669	0.30523		669	0.23778		669	0.28979		669	0.14631		669	0.15158		669	0.10065
668	0.40087		668	0.30801		668	0.24082		668	0.29469		668	0.14863		668	0.15456		668	0.10183
667	0.40159		667	0.30925		667	0.24218		667	0.29862		667	0.15148		667	0.15701		667	0.10343
666	0.40295		666	0.31083		666	0.24483		666	0.30221		666	0.1538		666	0.1602		666	0.10459
665	0.40316		665	0.31148		665	0.24536		665	0.30479		665	0.15606		665	0.16189		665	0.10559
664	0.40295		664	0.31162		664	0.24599		664	0.30771		664	0.15895		664	0.16393		664	0.10735
663	0.40219		663	0.31105		663	0.24648		663	0.30896		663	0.15988		663	0.16653		663	0.10818
662	0.40114		662	0.31054		662	0.2467		662	0.30958		662	0.16102		662	0.16671		662	0.10904
661	0.39923		661	0.30988		661	0.24585		661	0.31074		661	0.16217		661	0.1694		661	0.10973
660	0.39706		660	0.3079		660	0.24463		660	0.31025		660	0.16235		660	0.1693		660	0.11143
659	0.39569		659	0.30737		659	0.24454		659	0.3097		659	0.16354		659	0.1704		659	0.11245
658	0.3929		658	0.30501		658	0.243		658	0.30884		658	0.16364		658	0.17201		658	0.11306
657	0.39162		657	0.30386		657	0.24204		657	0.30861		657	0.16429		657	0.1728		657	0.11386
656	0.38959		656	0.30212		656	0.24151		656	0.30811		656	0.16425		656	0.17317		656	0.11482
655	0.38863		655	0.30262		655	0.23992		655	0.30675		655	0.1645		655	0.17413		655	0.11532
654	0.38641		654	0.29951		654	0.23888		654	0.30607		654	0.16363		654	0.1735		654	0.11502
653	0.38478		653	0.2985		653	0.23785		653	0.30463		653	0.16365		653	0.17397		653	0.11609
652	0.38449		652	0.29735		652	0.23713		652	0.30424		652	0.1638		652	0.17435		652	0.11645
651	0.38309		651	0.29664		651	0.23701		651	0.30326		651	0.16334		651	0.17388		651	0.11618
650	0.38344		650	0.29745		650	0.23674		650	0.30234		650	0.16363		650	0.17396		650	0.11662
649	0.38322		649	0.29635		649	0.23641		649	0.30277		649	0.16314		649	0.17494		649	0.11725
648	0.38369		648	0.29651		648	0.23662		648	0.30285		648	0.16414		648	0.17513		648	0.11747
647	0.38289		647	0.29673		647	0.23567		647	0.30136		647	0.16286		647	0.17405		647	0.11794
646	0.38434		646	0.29756		646	0.23697		646	0.30275		646	0.16412		646	0.17537		646	0.11832
645	0.38538		645	0.29854		645	0.23647		645	0.30281		645	0.16352		645	0.17525		645	0.11872
644	0.38661		644	0.29893		644	0.238		644	0.30397		644	0.16409		644	0.1758		644	0.11851
643	0.38768		643	0.30003		643	0.23828		643	0.30416		643	0.16405		643	0.17531		643	0.11842
642	0.38978		642	0.30176		642	0.23978		642	0.30526		642	0.16497		642	0.17687		642	0.11966
641	0.39197		641	0.30291		641	0.24056		641	0.30626		641	0.16544		641	0.17716		641	0.1192
640	0.3939		640	0.30463		640	0.24201		640	0.30812		640	0.16512		640	0.17751		640	0.11981
639	0.39623		639	0.30658		639	0.24284		639	0.3092		639	0.16673		639	0.17775		639	0.11972
638	0.39863		638	0.30891		638	0.24597		638	0.31161		638	0.16742		638	0.17898		638	0.12092
637	0.40097		637	0.3106		637	0.24638		637	0.31287		637	0.16843		637	0.17872		637	0.12079
636	0.40495		636	0.31414		636	0.24871		636	0.31611		636	0.16943		636	0.18065		636	0.12157
635	0.40695		635	0.31546		635	0.25083		635	0.31787		635	0.16948		635	0.1814		635	0.12178
634	0.41061		634	0.31955		634	0.25309		634	0.32107		634	0.17187		634	0.18261		634	0.12324
633	0.41439		633	0.32084		633	0.25535		633	0.32346		633	0.17278		633	0.18341		633	0.12264
632	0.4186		632	0.3249		632	0.2574		632	0.32715		632	0.17439		632	0.18526		632	0.12422
631	0.42213		631	0.3278		631	0.26028		631	0.32941		631	0.17562		631	0.18642		631	0.12446
630	0.42565		630	0.33144		630	0.2632		630	0.33332		630	0.17753		630	0.18776		630	0.12533
629	0.43034		629	0.33362		629	0.26481		629	0.33641		629	0.17883		629	0.18904		629	0.12565
628	0.43368		628	0.33771		628	0.26863		628	0.34078		628	0.18097		628	0.19057		628	0.12718
627	0.43822		627	0.34088		627	0.27108		627	0.34343		627	0.18256		627	0.19196		627	0.12767
626	0.4435		626	0.34628		626	0.27513		626	0.34869		626	0.18479		626	0.19439		626	0.12872
625	0.44762		625	0.34895		625	0.27765		625	0.35219		625	0.18635		625	0.19639		625	0.12976
624	0.45256		624	0.35297		624	0.28108		624	0.35691		624	0.18867		624	0.19795		624	0.13093
623	0.45623		623	0.35704		623	0.28469		623	0.36152		623	0.19059		623	0.1999		623	0.13169
622	0.46102		622	0.36087		622	0.28778		622	0.36557		622	0.19278		622	0.20197		622	0.13304
621	0.46566		621	0.36452		621	0.29102		621	0.37051		621	0.19437		621	0.20336		621	0.13402
620	0.47053		620	0.36884		620	0.29498		620	0.37488		620	0.19759		620	0.20617		620	0.13517
619	0.47517		619	0.37387		619	0.29841		619	0.38082		619	0.2005		619	0.20893		619	0.13664
618	0.47878		618	0.37637		618	0.30106		618	0.38437		618	0.20117		618	0.2106		618	0.13759
617	0.48279		617	0.38044		617	0.30448		617	0.38836		617	0.20453		617	0.21212		617	0.13818
616	0.48824		616	0.38406		616	0.30854		616	0.39428		616	0.20671		616	0.21593		616	0.14014
615	0.49193		615	0.38782		615	0.3108		615	0.39859		615	0.20901		615	0.21656		615	0.14107
614	0.4952		614	0.39082		614	0.31424		614	0.40246		614	0.21138		614	0.21955		614	0.14266
613	0.49825		613	0.39314		613	0.31695		613	0.40662		613	0.21333		613	0.22121		613	0.14358
612	0.50158		612	0.39663		612	0.31945		612	0.41033		612	0.21559		612	0.22327		612	0.14538
611	0.504		611	0.3987		611	0.32102		611	0.41346		611	0.21727		611	0.22509		611	0.14638
610	0.50515		610	0.40057		610	0.32279		610	0.41687		610	0.21872		610	0.22643		610	0.14739
609	0.50632		609	0.40173		609	0.32487		609	0.41962		609	0.22122		609	0.22866		609	0.14852
608	0.50629		608	0.40228		608	0.32488		608	0.42081		608	0.22161		608	0.2294		608	0.14855
607	0.50681		607	0.40352		607	0.32592		607	0.42323		607	0.22333		607	0.23081		607	0.14981
606	0.50679		606	0.40276		606	0.32611		606	0.42293		606	0.22322		606	0.23162		606	0.14985
605	0.50575		605	0.40291		605	0.32658		605	0.4245		605	0.22422		605	0.2329		605	0.15115
604	0.5044		604	0.40206		604	0.32557		604	0.42392		604	0.22508		604	0.23289		604	0.15142
603	0.50304		603	0.40053		603	0.32506		603	0.42425		603	0.22487		603	0.23379		603	0.15165
602	0.50138		602	0.399		602	0.32397		602	0.4227		602	0.22477		602	0.23391		602	0.15135
601	0.4998		601	0.39758		601	0.32221		601	0.42154		601	0.2246		601	0.23364		601	0.15258
600	0.49677		600	0.39572		600	0.32116		600	0.42041		600	0.22453		600	0.23381		600	0.15196
599	0.49472		599	0.39369		599	0.32039		599	0.41857		599	0.22428		599	0.23363		599	0.15178
598	0.49268		598	0.39177		598	0.31827		598	0.41692		598	0.22296		598	0.23274		598	0.152
597	0.49033		597	0.39018		597	0.31688		597	0.41478		597	0.22266		597	0.23262		597	0.15227
596	0.48768		596	0.38806		596	0.31483		596	0.41394		596	0.22194		596	0.23184		596	0.15184
595	0.48551		595	0.38584		595	0.31456		595	0.4113		595	0.22145		595	0.23071		595	0.15173
594	0.48349		594	0.38457		594	0.31283		594	0.40957		594	0.21966		594	0.231		594	0.1515
593	0.48263		593	0.38319		593	0.31151		593	0.40873		593	0.22017		593	0.23092		593	0.15213
592	0.48069		592	0.38163		592	0.31016		592	0.40661		592	0.2187		592	0.23057		592	0.15111
591	0.47973		591	0.3806		591	0.31006		591	0.40491		591	0.21845		591	0.22956		591	0.15164
590	0.47799		590	0.37915		590	0.30829		590	0.40441		590	0.21762		590	0.22896		590	0.15168
589	0.47791		589	0.37929		589	0.30758		589	0.40303		589	0.21746		589	0.22885		589	0.1517
588	0.47703		588	0.37903		588	0.30746		588	0.40127		588	0.21753		588	0.22932		588	0.15171
587	0.47716		587	0.37815		587	0.30637		587	0.40044		587	0.2165		587	0.2285		587	0.15094
586	0.4765		586	0.37714		586	0.3069		586	0.40036		586	0.21606		586	0.22817		586	0.15208
585	0.47634		585	0.37754		585	0.30593		585	0.4001		585	0.21632		585	0.22839		585	0.1516
584	0.47645		584	0.37739		584	0.30621		584	0.39963		584	0.21549		584	0.22783		584	0.15161
583	0.47673		583	0.37788		583	0.30566		583	0.39904		583	0.21558		583	0.22776		583	0.15172
582	0.477		582	0.37769		582	0.30575		582	0.39856		582	0.21553		582	0.22796		582	0.152
581	0.4783		581	0.37859		581	0.3061		581	0.3992		581	0.2153		581	0.22819		581	0.15181
580	0.47855		580	0.37827		580	0.30707		580	0.39876		580	0.21493		580	0.22741		580	0.15141
579	0.48034		579	0.37961		579	0.30768		579	0.39899		579	0.21547		579	0.22846		579	0.15308
578	0.48098		578	0.38009		578	0.30711		578	0.39938		578	0.21602		578	0.22899		578	0.1519
577	0.48119		577	0.3812		577	0.30769		577	0.39956		577	0.21516		577	0.22844		577	0.15259
576	0.483		576	0.38222		576	0.30857		576	0.40083		576	0.21579		576	0.22912		576	0.15328
575	0.4844		575	0.38231		575	0.30932		575	0.40102		575	0.21586		575	0.22885		575	0.1529
574	0.48608		574	0.38419		574	0.31004		574	0.40222		574	0.21625		574	0.2298		574	0.1537
573	0.48744		573	0.38505		573	0.31149		573	0.40255		573	0.21634		573	0.22913		573	0.15364
572	0.48938		572	0.38682		572	0.31215		572	0.40384		572	0.21707		572	0.23082		572	0.15403
571	0.49084		571	0.38789		571	0.31281		571	0.40462		571	0.21726		571	0.2304		571	0.15409
570	0.49249		570	0.38857		570	0.31375		570	0.40517		570	0.21734		570	0.2308		570	0.15453
569	0.49414		569	0.39074		569	0.31459		569	0.40644		569	0.2188		569	0.23134		569	0.15579
568	0.49563		568	0.39221		568	0.31607		568	0.40777		568	0.21865		568	0.23178		568	0.15484
567	0.49684		567	0.39308		567	0.31671		567	0.40896		567	0.21878		567	0.23208		567	0.15567
566	0.4993		566	0.39445		566	0.31794		566	0.41018		566	0.21918		566	0.23242		566	0.15615
565	0.50158		565	0.39565		565	0.31921		565	0.41154		565	0.22005		565	0.23352		565	0.15615
564	0.50342		564	0.39849		564	0.32109		564	0.41302		564	0.22096		564	0.23411		564	0.157
563	0.50615		563	0.40026		563	0.32226		563	0.41437		563	0.22118		563	0.23476		563	0.15773
562	0.50801		562	0.40149		562	0.32295		562	0.41627		562	0.22246		562	0.23468		562	0.15802
561	0.51088		561	0.40399		561	0.32522		561	0.41823		561	0.22297		561	0.23593		561	0.15844
560	0.51293		560	0.40532		560	0.32663		560	0.41962		560	0.22239		560	0.23605		560	0.15918
559	0.51508		559	0.40721		559	0.32813		559	0.42111		559	0.22418		559	0.23672		559	0.15872
558	0.51805		558	0.40905		558	0.33009		558	0.4231		558	0.2248		558	0.23791		558	0.15963
557	0.51965		557	0.41122		557	0.3312		557	0.42481		557	0.22499		557	0.23825		557	0.15988
556	0.52297		556	0.41294		556	0.33229		556	0.42653		556	0.22597		556	0.23931		556	0.1603
555	0.5255		555	0.41543		555	0.33386		555	0.42909		555	0.2274		555	0.24038		555	0.16146
554	0.52786		554	0.41774		554	0.33577		554	0.43091		554	0.22819		554	0.24106		554	0.161
553	0.5307		553	0.41966		553	0.3377		553	0.4322		553	0.22833		553	0.24146		553	0.1613
552	0.53412		552	0.42236		552	0.34001		552	0.43492		552	0.22945		552	0.24212		552	0.16254
551	0.53601		551	0.42466		551	0.3424		551	0.43731		551	0.23091		551	0.24347		551	0.16307
550	0.54019		550	0.42733		550	0.34276		550	0.43906		550	0.2317		550	0.24393		550	0.16323
549	0.5422		549	0.42948		549	0.34529		549	0.44128		549	0.23201		549	0.24546		549	0.16498
548	0.54502		548	0.43179		548	0.34715		548	0.44334		548	0.23314		548	0.24581		548	0.16421
547	0.54938		547	0.43533		547	0.34968		547	0.44593		547	0.23416		547	0.24687		547	0.16444
546	0.55201		546	0.43689		546	0.35163		546	0.44838		546	0.23557		546	0.2482		546	0.16592
545	0.55566		545	0.44033		545	0.3543		545	0.4518		545	0.23722		545	0.2498		545	0.16637
544	0.55882		544	0.44307		544	0.35666		544	0.45429		544	0.23805		544	0.25016		544	0.16714
543	0.56222		543	0.44563		543	0.35858		543	0.45738		543	0.23935		543	0.25133		543	0.16743
542	0.56592		542	0.44885		542	0.36057		542	0.45915		542	0.24002		542	0.25251		542	0.16874
541	0.56998		541	0.45103		541	0.36402		541	0.46262		541	0.24149		541	0.2539		541	0.16956
540	0.57257		540	0.45521		540	0.36595		540	0.46589		540	0.24277		540	0.25514		540	0.16992
539	0.57643		539	0.45717		539	0.36795		539	0.46816		539	0.24403		539	0.25588		539	0.17014
538	0.58		538	0.46058		538	0.37036		538	0.47112		538	0.2455		538	0.25708		538	0.17096
537	0.58423		537	0.46391		537	0.37351		537	0.47469		537	0.24645		537	0.25849		537	0.17217
536	0.58818		536	0.46705		536	0.37571		536	0.47781		536	0.2485		536	0.25993		536	0.17259
535	0.59246		535	0.47008		535	0.37893		535	0.48094		535	0.24989		535	0.26062		535	0.17368
534	0.59575		534	0.47361		534	0.38049		534	0.48469		534	0.25085		534	0.26236		534	0.17356
533	0.60056		533	0.47708		533	0.3842		533	0.48843		533	0.25259		533	0.26335		533	0.17467
532	0.6051		532	0.481		532	0.38737		532	0.49169		532	0.25463		532	0.26524		532	0.17686
531	0.61066		531	0.48482		531	0.39056		531	0.49508		531	0.25578		531	0.2673		531	0.17756
530	0.6141		530	0.48908		530	0.39295		530	0.49929		530	0.25748		530	0.26819		530	0.17785
529	0.61905		529	0.49211		529	0.39587		529	0.50314		529	0.25952		529	0.26962		529	0.17846
528	0.623		528	0.49658		528	0.39954		528	0.5073		528	0.26026		528	0.27076		528	0.17897
527	0.62804		527	0.49983		527	0.40287		527	0.51166		527	0.26284		527	0.27292		527	0.1809
526	0.63395		526	0.5048		526	0.40655		526	0.51512		526	0.26429		526	0.27486		526	0.18203
525	0.63775		525	0.50838		525	0.40942		525	0.5197		525	0.26643		525	0.27574		525	0.18225
524	0.64256		524	0.51194		524	0.41259		524	0.52348		524	0.26797		524	0.27737		524	0.18228
523	0.64827		523	0.51722		523	0.41736		523	0.52846		523	0.26981		523	0.27926		523	0.18446
522	0.65315		522	0.52076		522	0.41924		522	0.5331		522	0.27176		522	0.28019		522	0.18477
521	0.65894		521	0.52586		521	0.4247		521	0.53793		521	0.27331		521	0.28338		521	0.1866
520	0.66453		520	0.53075		520	0.42824		520	0.54413		520	0.27622		520	0.28484		520	0.18708
519	0.66966		519	0.53514		519	0.43211		519	0.54785		519	0.27782		519	0.28616		519	0.18791
518	0.67558		518	0.53978		518	0.43521		518	0.55289		518	0.28052		518	0.28834		518	0.18862
517	0.68081		517	0.54518		517	0.43979		517	0.55877		517	0.28211		517	0.29069		517	0.19008
516	0.68756		516	0.55082		516	0.44428		516	0.5638		516	0.28482		516	0.29309		516	0.19142
515	0.69338		515	0.55541		515	0.44847		515	0.56972		515	0.28724		515	0.29427		515	0.19257
514	0.69949		514	0.55998		514	0.45285		514	0.5747		514	0.2896		514	0.29639		514	0.19301
513	0.70571		513	0.56576		513	0.45718		513	0.58101		513	0.29272		513	0.29864		513	0.1949
512	0.71225		512	0.5711		512	0.46225		512	0.58697		512	0.29475		512	0.30113		512	0.19596
511	0.71856		511	0.57647		511	0.46678		511	0.59288		511	0.29785		511	0.30306		511	0.19731
510	0.72539		510	0.5817		510	0.47127		510	0.59885		510	0.30009		510	0.30565		510	0.19769
509	0.73248		509	0.58784		509	0.4757		509	0.60537		509	0.3029		509	0.30778		509	0.19887
508	0.7389		508	0.59364		508	0.48156		508	0.61257		508	0.30664		508	0.31		508	0.20078
507	0.74661		507	0.59949		507	0.48652		507	0.62003		507	0.30952		507	0.31255		507	0.20191
506	0.75348		506	0.60649		506	0.49173		506	0.6269		506	0.31273		506	0.31594		506	0.20308
505	0.76004		505	0.61276		505	0.49729		505	0.63387		505	0.31561		505	0.31846		505	0.20542
504	0.76818		504	0.61811		504	0.50257		504	0.64083		504	0.31916		504	0.32119		504	0.20592
503	0.77568		503	0.62541		503	0.5085		503	0.64939		503	0.32272		503	0.32448		503	0.20776
502	0.78401		502	0.63221		502	0.51497		502	0.65812		502	0.32707		502	0.32777		502	0.21
501	0.78993		501	0.6382		501	0.51964		501	0.66445		501	0.32966		501	0.33		501	0.21022
500	0.79859		500	0.64565		500	0.52664		500	0.67362		500	0.33365		500	0.33297		500	0.21247
499	0.80664		499	0.65306		499	0.53279		499	0.68183		499	0.33821		499	0.33676		499	0.21433
498	0.81474		498	0.65975		498	0.53801		498	0.69066		498	0.34148		498	0.34056		498	0.21604
497	0.82378		497	0.66655		497	0.54491		497	0.70013		497	0.34625		497	0.34377		497	0.21722
496	0.83002		496	0.67326		496	0.55022		496	0.70778		496	0.34971		496	0.34681		496	0.21878
495	0.83918		495	0.68046		495	0.55763		495	0.71748		495	0.35461		495	0.35094		495	0.22065
494	0.84697		494	0.68909		494	0.56331		494	0.72698		494	0.35877		494	0.35494		494	0.22298
493	0.85503		493	0.69662		493	0.57078		493	0.73638		493	0.36394		493	0.35775		493	0.22494
492	0.86359		492	0.70289		492	0.57746		492	0.74603		492	0.36817		492	0.36228		492	0.22658
491	0.87187		491	0.71052		491	0.58375		491	0.75747		491	0.37356		491	0.36665		491	0.2285
490	0.87952		490	0.7174		490	0.5897		490	0.76605		490	0.37801		490	0.3705		490	0.2296
489	0.88781		489	0.72545		489	0.59684		489	0.77623		489	0.3831		489	0.37506		489	0.23216
488	0.89608		488	0.73239		488	0.6033		488	0.78657		488	0.38854		488	0.37848		488	0.23414
487	0.90362		487	0.73997		487	0.61062		487	0.79672		487	0.39397		487	0.38388		487	0.2367
486	0.91253		486	0.74761		486	0.61723		486	0.80714		486	0.39914		486	0.38927		486	0.23881
485	0.92057		485	0.75463		485	0.62366		485	0.81724		485	0.40476		485	0.39349		485	0.2414
484	0.92892		484	0.76189		484	0.63052		484	0.82858		484	0.41059		484	0.39839		484	0.24371
483	0.9359		483	0.77024		483	0.63755		483	0.83861		483	0.41626		483	0.40366		483	0.2461
482	0.94441		482	0.77735		482	0.64399		482	0.84945		482	0.42178		482	0.40847		482	0.2485
481	0.95212		481	0.78357		481	0.65017		481	0.86011		481	0.42784		481	0.41296		481	0.2509
480	0.9597		480	0.79152		480	0.65769		480	0.87089		480	0.43384		480	0.41896		480	0.25348
479	0.96733		479	0.79767		479	0.66409		479	0.88128		479	0.43928		479	0.42453		479	0.2562
478	0.97692		478	0.806		478	0.67206		478	0.89324		478	0.446		478	0.42998		478	0.25899
477	0.98304		477	0.813		477	0.67823		477	0.90402		477	0.45182		477	0.43605		477	0.26156
476	0.99082		476	0.81925		476	0.68465		476	0.91473		476	0.45762		476	0.44032		476	0.26404
475	0.99833		475	0.82626		475	0.69135		475	0.92573		475	0.4647		475	0.44696		475	0.26706
474	1.00639		474	0.83344		474	0.69843		474	0.9362		474	0.47063		474	0.45154		474	0.27024
473	1.014		473	0.84107		473	0.70566		473	0.9482		473	0.47735		473	0.45833		473	0.27278
472	1.02185		472	0.8478		472	0.71223		472	0.95928		472	0.48426		472	0.46516		472	0.27628
471	1.02911		471	0.85594		471	0.71889		471	0.97098		471	0.491		471	0.47043		471	0.27888
470	1.03679		470	0.86176		470	0.72499		470	0.98132		470	0.49729		470	0.47605		470	0.28237
469	1.04506		469	0.87077		469	0.73323		469	0.99384		469	0.50477		469	0.48462		469	0.28616
468	1.052		468	0.87698		468	0.74012		468	1.00503		468	0.5123		468	0.4908		468	0.28939
467	1.06004		467	0.88414		467	0.74687		467	1.01676		467	0.51887		467	0.49798		467	0.29299
466	1.06687		466	0.89176		466	0.75334		466	1.02801		466	0.52616		466	0.50382		466	0.2965
465	1.0752		465	0.89837		465	0.76055		465	1.03997		465	0.53368		465	0.51196		465	0.30098
464	1.08089		464	0.90502		464	0.76667		464	1.05114		464	0.54022		464	0.51807		464	0.30331
463	1.08898		463	0.91243		463	0.77359		463	1.06225		463	0.54758		463	0.52514		463	0.30723
462	1.09517		462	0.91826		462	0.78011		462	1.07335		462	0.55517		462	0.53271		462	0.31052
461	1.1009		461	0.92445		461	0.7856		461	1.08442		461	0.56199		461	0.53933		461	0.31431
460	1.10861		460	0.93175		460	0.79277		460	1.09658		460	0.56993		460	0.5471		460	0.31913
459	1.11376		459	0.93699		459	0.79928		459	1.10738		459	0.57711		459	0.5541		459	0.32305
458	1.1208		458	0.94359		458	0.8053		458	1.11816		458	0.5839		458	0.56189		458	0.32654
457	1.12551		457	0.94939		457	0.8103		457	1.12827		457	0.59212		457	0.56851		457	0.3302
456	1.13238		456	0.95488		456	0.8165		456	1.1398		456	0.59853		456	0.57729		456	0.33478
455	1.13796		455	0.96016		455	0.82149		455	1.14905		455	0.60609		455	0.5842		455	0.33961
454	1.1426		454	0.96541		454	0.82758		454	1.15948		454	0.61283		454	0.59221		454	0.34352
453	1.14733		453	0.9696		453	0.83178		453	1.16889		453	0.62021		453	0.59893		453	0.34786
452	1.15153		452	0.97499		452	0.83773		452	1.17869		452	0.62694		452	0.60665		452	0.35131
451	1.15541		451	0.97921		451	0.84175		451	1.18712		451	0.63349		451	0.61384		451	0.35555
450	1.15992		450	0.98354		450	0.84612		450	1.19622		450	0.64093		450	0.62264		450	0.36119
449	1.16348		449	0.98592		449	0.84976		449	1.20484		449	0.647		449	0.62859		449	0.36469
448	1.16744		448	0.98964		448	0.85408		448	1.21204		448	0.6534		448	0.63571		448	0.36935
447	1.16952		447	0.99327		447	0.85854		447	1.22028		447	0.65972		447	0.64307		447	0.37373
446	1.17184		446	0.99618		446	0.8616		446	1.22715		446	0.66517		446	0.64987		446	0.37781
445	1.17393		445	0.99917		445	0.86408		445	1.23414		445	0.67097		445	0.65566		445	0.38179
444	1.1765		444	1.00158		444	0.86759		444	1.23931		444	0.6768		444	0.66264		444	0.38629
443	1.17834		443	1.00402		443	0.87037		443	1.24616		443	0.68189		443	0.67015		443	0.3911
442	1.18004		442	1.00499		442	0.8722		442	1.25123		442	0.68702		442	0.6759		442	0.39496
441	1.18041		441	1.00744		441	0.87456		441	1.2554		441	0.69192		441	0.68045		441	0.39864
440	1.18222		440	1.0089		440	0.87647		440	1.26128		440	0.69611		440	0.68784		440	0.40324
439	1.18286		439	1.00964		439	0.87824		439	1.2658		439	0.70023		439	0.69242		439	0.40686
438	1.18427		438	1.01161		438	0.88031		438	1.26997		438	0.70469		438	0.69868		438	0.41064
437	1.18532		437	1.01335		437	0.8821		437	1.27375		437	0.70855		437	0.70372		437	0.41428
436	1.18652		436	1.01353		436	0.88358		436	1.27852		436	0.71304		436	0.70857		436	0.41905
435	1.18727		435	1.01555		435	0.88606		435	1.28199		435	0.71655		435	0.71423		435	0.42246
434	1.18814		434	1.01621		434	0.88751		434	1.28592		434	0.71996		434	0.71866		434	0.4256
433	1.18816		433	1.01716		433	0.88813		433	1.28949		433	0.72325		433	0.72388		433	0.42928
432	1.19025		432	1.01892		432	0.89024		432	1.29368		432	0.72745		432	0.7286		432	0.433
431	1.19008		431	1.01961		431	0.89183		431	1.29605		431	0.72991		431	0.73185		431	0.43581
430	1.19134		430	1.0209		430	0.8926		430	1.29958		430	0.7339		430	0.73654		430	0.4395
429	1.19209		429	1.02182		429	0.89416		429	1.30333		429	0.73633		429	0.7407		429	0.4429
428	1.19334		428	1.0233		428	0.8956		428	1.3064		428	0.7395		428	0.74481		428	0.44573
427	1.19414		427	1.0242		427	0.89639		427	1.31009		427	0.74284		427	0.7482		427	0.44827
426	1.19444		426	1.02509		426	0.89844		426	1.31203		426	0.74521		426	0.75182		426	0.45138
425	1.19626		425	1.02678		425	0.89986		425	1.31488		425	0.74727		425	0.75574		425	0.45368
424	1.19715		424	1.02841		424	0.90056		424	1.31854		424	0.75037		424	0.7586		424	0.45637
423	1.1982		423	1.02916		423	0.90224		423	1.32122		423	0.75303		423	0.76294		423	0.45892
422	1.19914		422	1.0309		422	0.90409		422	1.32457		422	0.75508		422	0.76533		422	0.46165
421	1.20046		421	1.03161		421	0.90467		421	1.32751		421	0.7579		421	0.76853		421	0.46318
420	1.20218		420	1.03301		420	0.90719		420	1.33106		420	0.76072		420	0.77145		420	0.46615
419	1.20207		419	1.03328		419	0.90799		419	1.33303		419	0.76338		419	0.77546		419	0.46778
418	1.20403		418	1.03512		418	0.91001		418	1.33677		418	0.76618		418	0.77781		418	0.47009
417	1.20517		417	1.03699		417	0.91133		417	1.33938		417	0.76812		417	0.78078		417	0.47225
416	1.20698		416	1.03848		416	0.91241		416	1.34328		416	0.77061		416	0.78422		416	0.47478
415	1.20794		415	1.03965		415	0.91441		415	1.34572		415	0.77341		415	0.78675		415	0.47599
414	1.20889		414	1.04133		414	0.91538		414	1.34942		414	0.77549		414	0.78946		414	0.47858
413	1.21082		413	1.04248		413	0.91735		413	1.35225		413	0.77853		413	0.79259		413	0.48054
412	1.2121		412	1.04458		412	0.91911		412	1.35506		412	0.78082		412	0.7961		412	0.48127
411	1.21344		411	1.04489		411	0.92048		411	1.3589		411	0.78313		411	0.79823		411	0.48449
410	1.2132		410	1.04605		410	0.92157		410	1.3599		410	0.78496		410	0.80084		410	0.48567
409	1.21447		409	1.04629		409	0.92229		409	1.36382		409	0.78724		409	0.80393		409	0.48697
408	1.21438		408	1.04798		408	0.92489		408	1.36611		408	0.78997		408	0.80526		408	0.48947
407	1.21642		407	1.04927		407	0.92537		407	1.3678		407	0.79202		407	0.80901		407	0.4904
406	1.21704		406	1.04934		406	0.92572		406	1.37159		406	0.79451		406	0.81121		406	0.4927
405	1.21737		405	1.05049		405	0.92758		405	1.37451		405	0.79641		405	0.81398		405	0.49453
404	1.21759		404	1.05106		404	0.92792		404	1.37554		404	0.79888		404	0.81679		404	0.49613
403	1.21841		403	1.05184		403	0.92911		403	1.3785		403	0.80085		403	0.82018		403	0.49831
402	1.2184		402	1.05291		402	0.93018		402	1.38054		402	0.80265		402	0.82271		402	0.50066
401	1.21742		401	1.05223		401	0.9309		401	1.38232		401	0.80448		401	0.82389		401	0.50193
400	1.21765		400	1.05207		400	0.93066		400	1.38283		400	0.80611		400	0.82641		400	0.50296
399	1.21671		399	1.05148		399	0.93074		399	1.38351		399	0.80762		399	0.82873		399	0.50484
398	1.21566		398	1.05079		398	0.93084		398	1.38379		398	0.80857		398	0.83007		398	0.50601
397	1.21391		397	1.05006		397	0.92982		397	1.38394		397	0.80971		397	0.83163		397	0.50741
396	1.21372		396	1.04958		396	0.92922		396	1.38424		396	0.81133		396	0.83378		396	0.50921
395	1.21066		395	1.04748		395	0.92785		395	1.38402		395	0.81087		395	0.83475		395	0.50985
394	1.20891		394	1.04636		394	0.92642		394	1.38328		394	0.81114		394	0.83583		394	0.51088
393	1.20565		393	1.04431		393	0.92455		393	1.38043		393	0.81096		393	0.83625		393	0.51126
392	1.20246		392	1.04097		392	0.92345		392	1.37907		392	0.81079		392	0.83638		392	0.51189
391	1.19878		391	1.03797		391	0.92171		391	1.37629		391	0.8103		391	0.83679		391	0.5125
390	1.19456		390	1.03454		390	0.91745		390	1.37248		390	0.80901		390	0.83538		390	0.51286
389	1.18923		389	1.03157		389	0.91529		389	1.36957		389	0.80805		389	0.83501		389	0.51305
388	1.1855		388	1.02659		388	0.91222		388	1.36381		388	0.80587		388	0.834		388	0.51276
387	1.17985		387	1.02243		387	0.90781		387	1.35877		387	0.80266		387	0.8322		387	0.5124
386	1.17383		386	1.01667		386	0.90354		386	1.35257		386	0.80006		386	0.82978		386	0.51091
385	1.16826		385	1.01276		385	0.89975		385	1.34714		385	0.79771		385	0.82881		385	0.51084
384	1.1622		384	1.00717		384	0.89541		384	1.34025		384	0.79475		384	0.82468		384	0.50952
383	1.1557		383	1.00126		383	0.88925		383	1.33242		383	0.79132		383	0.82273		383	0.50828
382	1.14855		382	0.9947		382	0.88494		382	1.32628		382	0.78691		382	0.81972		382	0.50668
381	1.14231		381	0.98918		381	0.8794		381	1.3185		381	0.78416		381	0.81654		381	0.50708
380	1.13548		380	0.98322		380	0.87399		380	1.31054		380	0.77985		380	0.81252		380	0.50562
379	1.12743		379	0.97671		379	0.86794		379	1.30176		379	0.77491		379	0.80856		379	0.5028
378	1.12049		378	0.96946		378	0.862		378	1.29358		378	0.77009		378	0.80416		378	0.50117
377	1.11081		377	0.96212		377	0.8553		377	1.28343		377	0.76474		377	0.7987		377	0.49768
376	1.10372		376	0.95542		376	0.84879		376	1.27549		376	0.76003		376	0.79572		376	0.49673
375	1.09529		375	0.94798		375	0.8426		375	1.26559		375	0.75529		375	0.7913		375	0.49386
374	1.08804		374	0.942		374	0.83835		374	1.25676		374	0.75024		374	0.78632		374	0.49196
373	1.08085		373	0.93539		373	0.83151		373	1.24701		373	0.7451		373	0.78053		373	0.48918
372	1.07148		372	0.92779		372	0.82459		372	1.23777		372	0.73951		372	0.77548		372	0.48641
371	1.06434		371	0.92261		371	0.81954		371	1.22812		371	0.73426		371	0.77074		371	0.48433
370	1.05603		370	0.91431		370	0.81361		370	1.2192		370	0.72888		370	0.76555		370	0.48179
369	1.04907		369	0.9077		369	0.8071		369	1.21004		369	0.72416		369	0.76107		369	0.47906
368	1.0409		368	0.90002		368	0.80043		368	1.20253		368	0.71956		368	0.75651		368	0.47752
367	1.03568		367	0.89528		367	0.79619		367	1.1943		367	0.71541		367	0.75345		367	0.47524
366	1.02782		366	0.8882		366	0.7894		366	1.18537		366	0.70988		366	0.749		366	0.4739
365	1.01942		365	0.88214		365	0.78323		365	1.17663		365	0.70497		365	0.74446		365	0.47024
364	1.01347		364	0.87615		364	0.77873		364	1.1687		364	0.70027		364	0.73934		364	0.46805
363	1.00548		363	0.86973		363	0.77338		363	1.1601		363	0.69521		363	0.7336		363	0.46617
362	1.00165		362	0.86479		362	0.76889		362	1.1524		362	0.69236		362	0.73196		362	0.46514
361	0.99354		361	0.85803		361	0.76308		361	1.14251		361	0.68673		361	0.72723		361	0.46242
360	0.98816		360	0.85283		360	0.75808		360	1.13551		360	0.68154		360	0.72248		360	0.46074
359	0.98023		359	0.84782		359	0.75331		359	1.1274		359	0.67774		359	0.71829		359	0.45904
358	0.9768		358	0.84333		358	0.75025		358	1.12177		358	0.67435		358	0.71552		358	0.45764
357	0.97144		357	0.83727		357	0.74488		357	1.11395		357	0.67118		357	0.71147		357	0.45516
356	0.9662		356	0.83386		356	0.74129		356	1.10845		356	0.66712		356	0.70799		356	0.45279
355	0.96317		355	0.82963		355	0.73884		355	1.10358		355	0.6646		355	0.70451		355	0.45337
354	0.9576		354	0.8246		354	0.73248		354	1.09587		354	0.66018		354	0.69949		354	0.44991
353	0.95208		353	0.82216		353	0.73124		353	1.09054		353	0.65825		353	0.69776		353	0.45032
352	0.94956		352	0.81998		352	0.72845		352	1.08659		352	0.65548		352	0.6975		352	0.4493
351	0.94767		351	0.81986		351	0.72797		351	1.0808		351	0.65389		351	0.69589		351	0.44843
350	0.9453		350	0.81675		350	0.72552		350	1.0781		350	0.65174		350	0.69355		350	0.44705
349	0.94144		349	0.81294		349	0.72165		349	1.07457		349	0.64977		349	0.68997		349	0.44585
348	0.93643		348	0.81025		348	0.72038		348	1.06871		348	0.6467		348	0.68745		348	0.44361
347	0.93816		347	0.81231		347	0.71907		347	1.06622		347	0.64683		347	0.69028		347	0.44618
346	0.93712		346	0.81044		346	0.71887		346	1.06584		346	0.64592		346	0.68717		346	0.44468
345	0.93639		345	0.81		345	0.72048		345	1.06056		345	0.64801		345	0.69038		345	0.44673
344	0.9314		344	0.80428		344	0.71764		344	1.05745		344	0.64012		344	0.68417		344	0.44248
343	0.93045		343	0.80723		343	0.71551		343	1.05253		343	0.64152		343	0.68303		343	0.44372
342	0.92868		342	0.80596		342	0.71487		342	1.04962		342	0.64029		342	0.68516		342	0.44363
341	0.92857		341	0.80314		341	0.71466		341	1.04525		341	0.64032		341	0.68272		341	0.44525
340	0.92587		340	0.8055		340	0.71406		340	1.03776		340	0.63728		340	0.68185		340	0.44453
339	0.91748		339	0.80082		339	0.70868		339	1.03005		339	0.6339		339	0.67927		339	0.44357
338	0.91589		338	0.7949		338	0.70692		338	1.01982		338	0.63162		338	0.67607		338	0.44279
337	0.90376		337	0.79245		337	0.70366		337	1.00952		337	0.62774		337	0.67592		337	0.43993
336	0.89745		336	0.78658		336	0.69747		336	0.99435		336	0.62574		336	0.66863		336	0.43952
335	0.88262		335	0.77301		335	0.68694		335	0.97893		335	0.61565		335	0.66414		335	0.43495
334	0.87789		334	0.76864		334	0.68011		334	0.95758		334	0.60543		334	0.65555		334	0.43598
333	0.85691		333	0.74733		333	0.67214		333	0.93317		333	0.60197		333	0.64647		333	0.42735
332	0.84451		332	0.7447		332	0.66762		332	0.91725		332	0.59138		332	0.63927		332	0.4253
331	0.82483		331	0.72399		331	0.64544		331	0.88533		331	0.58017		331	0.62954		331	0.41488
330	0.80494		330	0.71132		330	0.63706		330	0.86075		330	0.56551		330	0.61622		330	0.41079
329	0.78358		329	0.6911		329	0.62328		329	0.83298		329	0.55225		329	0.6084		329	0.41096
328	0.76103		328	0.68252		328	0.60435		328	0.80931		328	0.53801		328	0.58961		328	0.40587
327	0.73353		327	0.65734		327	0.5886		327	0.76668		327	0.5279		327	0.57304		327	0.39124
326	0.71103		326	0.63513		326	0.57318		326	0.73849		326	0.51372		326	0.56033		326	0.3885
325	0.6749		325	0.61478		325	0.54992		325	0.70391		325	0.48055		325	0.53807		325	0.37458
324	0.66297		324	0.59793		324	0.53133		324	0.6713		324	0.47132		324	0.52229		324	0.3654
323	0.64271		323	0.57559		323	0.51717		323	0.65166		323	0.457		323	0.50918		323	0.35507
322	0.62265		322	0.56131		322	0.4946		322	0.63058		322	0.44756		322	0.49566		322	0.35445
321	0.60344		321	0.5379		321	0.47855		321	0.60202		321	0.42837		321	0.47656		321	0.34102
320	0.58096		320	0.5298		320	0.46634		320	0.59469		320	0.42072		320	0.46594		320	0.33512
319	0.56819		319	0.51491		319	0.45817		319	0.56594		319	0.40799		319	0.45565		319	0.3303
318	0.49399		318	0.44776		318	0.39155		318	0.49418		318	0.34921		318	0.39315		318	0.27522
317	0.48826		317	0.43302		317	0.3793		317	0.4763		317	0.33673		317	0.37477		317	0.2584
316	0.47089		316	0.42415		316	0.3681		316	0.46148		316	0.32596		316	0.36672		316	0.25744
315	0.45341		315	0.41635		315	0.35317		315	0.44362		315	0.31328		315	0.35659		315	0.25216
314	0.43218		314	0.40435		314	0.34462		314	0.42725		314	0.30874		314	0.3494		314	0.24475
313	0.44035		313	0.39233		313	0.34367		313	0.42896		313	0.29868		313	0.35541		313	0.23488
312	0.44769		312	0.39262		312	0.33718		312	0.43021		312	0.30978		312	0.35397		312	0.24381
311	0.43864		311	0.39197		311	0.34123		311	0.42975		311	0.30512		311	0.348		311	0.23574
310	0.42929		310	0.37971		310	0.32928		310	0.40488		310	0.29223		310	0.34012		310	0.23433
309	0.4155		309	0.3767		309	0.32355		309	0.39971		309	0.28228		309	0.32833		309	0.23746
308	0.49518		308	0.41216		308	0.3485		308	0.43425		308	0.26075		308	0.28149		308	0.18967
307	0.48991		307	0.4096		307	0.34509		307	0.43184		307	0.26186		307	0.28327		307	0.19125
306	0.48991		306	0.40974		306	0.34529		306	0.4327		306	0.26208		306	0.28019		306	0.18902
305	0.49562		305	0.41414		305	0.34572		305	0.43197		305	0.26301		305	0.28199		305	0.19082
304	0.49437		304	0.41243		304	0.34687		304	0.43358		304	0.2608		304	0.28159		304	0.18947
303	0.49119		303	0.41227		303	0.34475		303	0.43547		303	0.26018		303	0.28347		303	0.1901
302	0.49869		302	0.41392		302	0.34151		302	0.43441		302	0.26183		302	0.28177		302	0.19288
301	0.50197		301	0.41139		301	0.34694		301	0.43566		301	0.26375		301	0.28592		301	0.18743
300	0.49605		300	0.41452		300	0.3502		300	0.43606		300	0.26401		300	0.28337		300	0.19634

## Sheet: Tabelle2
Raw data Figure 7a: cumulative sedimentation coefficient distribution measued at 550 nm
sedimentation coefficient / sved	Qext / -
12703.1	0
12963	0.02107
13228.3	0.05552
13499	0.10196
13775.2	0.15574
14057.1	0.21113
14344.8	0.26442
14638.3	0.31494
14937.9	0.36414
15243.6	0.41436
15555.5	0.46773
15873.8	0.52508
16198.6	0.58516
16530.1	0.64513
16868.4	0.70214
17213.6	0.75438
17565.8	0.80173
17925.3	0.84481
18292.1	0.88382
18666.4	0.91798
19048.4	0.94629
19438.2	0.96863
19836	0.98588
20241.9	1

## Sheet: Tabelle3
Raw data Figure 7b - UV/Vis spectra of the sedimentation coefficient intervals 1-5
wavelength / nm	interval 1 turbidity / a.u.	interval 2 turbidity / a.u.	interval 3 turbidity / a.u.	interval 4 turbidity / a.u.	interval 5 turbidity / a.u.
540.53	0.25631	0.26611	0.26905	0.2752	0.24714
541.616	0.2508	0.26719	0.2623	0.27242	0.24332
542.701	0.24828	0.26446	0.25726	0.27093	0.238
543.785	0.24827	0.25659	0.25367	0.26413	0.23381
544.869	0.24462	0.25184	0.2472	0.26104	0.22631
545.952	0.24108	0.24599	0.2405	0.25362	0.22206
547.035	0.24042	0.23796	0.23829	0.24821	0.22007
548.118	0.23791	0.23322	0.23528	0.23958	0.22409
549.2	0.23099	0.23119	0.23035	0.23331	0.22666
550.282	0.22676	0.22681	0.22683	0.22687	0.2267
551.363	0.22267	0.22204	0.22277	0.22272	0.2226
552.444	0.21916	0.21836	0.21793	0.21769	0.22078
553.525	0.2164	0.21289	0.21663	0.21405	0.21652
554.605	0.21473	0.20777	0.21222	0.20969	0.21143
555.684	0.21139	0.2037	0.20611	0.20754	0.20422
556.763	0.20666	0.20104	0.20171	0.2049	0.19909
557.842	0.20301	0.1959	0.19898	0.19976	0.19409
558.92	0.20046	0.1933	0.19151	0.19862	0.18475
559.998	0.19517	0.19133	0.18681	0.19506	0.18092	7b
561.075	0.19374	0.18871	0.18434	0.19124	0.18
562.152	0.1903	0.1867	0.18055	0.18805	0.17918
563.229	0.18733	0.18565	0.17622	0.1878	0.17181
564.305	0.18526	0.18195	0.17518	0.18314	0.17503
565.38	0.18358	0.17806	0.17343	0.18144	0.1748
566.456	0.18105	0.17425	0.17155	0.17967	0.17078
567.53	0.17756	0.17509	0.16778	0.17844	0.16726
568.605	0.17525	0.17331	0.16478	0.1775	0.16848
569.678	0.17366	0.17219	0.16354	0.17557	0.16711
570.752	0.17394	0.16975	0.16301	0.17413	0.16121
571.825	0.17077	0.1699	0.16081	0.1716	0.16117
572.897	0.16913	0.16678	0.16053	0.16796	0.16237
573.969	0.16829	0.16337	0.1619	0.16312	0.16244
575.041	0.16556	0.16051	0.16149	0.16121	0.15926
576.112	0.16265	0.16129	0.15855	0.15983	0.15812
577.183	0.16277	0.15937	0.15827	0.15841	0.15485
578.253	0.16371	0.15737	0.15797	0.15773	0.15272
579.323	0.16284	0.15782	0.15769	0.15741	0.1551
580.393	0.1621	0.15853	0.15628	0.1577	0.15452
581.462	0.16091	0.15727	0.15791	0.15557	0.15837
582.53	0.16045	0.15704	0.15967	0.1537	0.16188
583.598	0.16177	0.1569	0.15874	0.15507	0.15901
584.666	0.16255	0.15454	0.15801	0.15331	0.15881
585.733	0.16286	0.15501	0.15752	0.15335	0.15605
586.8	0.16483	0.15424	0.15691	0.15571	0.15278
587.866	0.1645	0.15416	0.15692	0.157	0.14978
588.932	0.1623	0.15418	0.15687	0.15582	0.1512
589.998	0.16145	0.15541	0.15781	0.15791	0.14862
591.063	0.16017	0.15684	0.1576	0.15934	0.14882
592.127	0.15918	0.15567	0.16039	0.15734	0.15248
593.192	0.16092	0.15488	0.15928	0.15766	0.15379
594.255	0.16169	0.15452	0.16108	0.15767	0.15478
595.319	0.16329	0.15485	0.15966	0.15887	0.15399
596.381	0.16411	0.15407	0.16198	0.1569	0.15897
597.444	0.16404	0.15664	0.16099	0.15868	0.15908
598.506	0.16406	0.15877	0.16126	0.16001	0.15975
599.567	0.16359	0.16187	0.1619	0.16194	0.16017
600.628	0.16302	0.16525	0.16229	0.16313	0.16024
601.689	0.16236	0.16726	0.16202	0.16575	0.15651
602.749	0.16486	0.1673	0.16236	0.16825	0.15468
603.809	0.166	0.16852	0.16503	0.17102	0.1524
604.868	0.16862	0.17037	0.16583	0.17299	0.15287
605.927	0.17004	0.17024	0.16937	0.17529	0.15491
606.986	0.17291	0.17245	0.17037	0.1772	0.15618
608.044	0.17498	0.17523	0.17341	0.17758	0.15916
609.101	0.17614	0.17925	0.17333	0.17868	0.16252
610.158	0.1788	0.18089	0.17718	0.17949	0.16512
611.215	0.18275	0.1833	0.17901	0.18075	0.1682
612.271	0.1867	0.18472	0.1843	0.18302	0.16987
613.327	0.19077	0.18521	0.18979	0.18369	0.17101
614.382	0.19342	0.18807	0.19442	0.18421	0.17524
615.437	0.1941	0.19101	0.19798	0.18537	0.1784
616.492	0.19681	0.19489	0.2014	0.18604	0.18142
617.546	0.20099	0.19791	0.20307	0.18888	0.18669
618.6	0.20519	0.20183	0.20353	0.19361	0.18616
619.653	0.20703	0.20347	0.20668	0.19725	0.18876
620.705	0.21117	0.20538	0.2111	0.19911	0.19505
621.758	0.21563	0.20901	0.21424	0.20278	0.19695
622.81	0.21732	0.21458	0.21782	0.20617	0.19837
623.861	0.21908	0.21938	0.224	0.2083	0.20699
624.912	0.2251	0.22233	0.23146	0.21208	0.21056
625.962	0.23017	0.23035	0.23277	0.21993	0.20847
627.013	0.23327	0.23567	0.23918	0.22571	0.21208
628.062	0.23979	0.2384	0.24657	0.22735	0.22016
629.111	0.24351	0.24602	0.24874	0.23335	0.22072
630.16	0.24553	0.2556	0.25169	0.23822	0.22271
631.209	0.25043	0.26159	0.2565	0.24333	0.22777
632.256	0.25423	0.26881	0.26022	0.24997	0.22814
633.304	0.25974	0.27572	0.26611	0.25718	0.22817
634.351	0.26618	0.2823	0.27346	0.26198	0.23048
635.397	0.27673	0.28709	0.27932	0.26825	0.23779
636.444	0.28305	0.29024	0.28866	0.27255	0.2434
637.489	0.28954	0.29741	0.29735	0.27516	0.25236
638.535	0.29399	0.30523	0.30422	0.2817	0.25957
639.579	0.30133	0.31235	0.31012	0.2916	0.267
640.624	0.30525	0.32173	0.31855	0.29914	0.27122
641.668	0.31071	0.33409	0.32629	0.30634	0.27874
642.711	0.31944	0.34196	0.33646	0.31684	0.28184
643.754	0.32861	0.35184	0.3453	0.32512	0.28693
644.797	0.33716	0.36016	0.35803	0.33186	0.29398
645.839	0.34909	0.36814	0.37036	0.34008	0.30281
646.881	0.36067	0.37599	0.38342	0.35094	0.30666
647.922	0.37201	0.38546	0.39565	0.35844	0.31643
648.963	0.38134	0.39885	0.40635	0.36812	0.32332
650.003	0.39251	0.41325	0.41608	0.37888	0.33218
651.043	0.40488	0.42422	0.42863	0.38921	0.33727
652.083	0.41844	0.43814	0.43884	0.39935	0.34667
653.122	0.43019	0.45457	0.44967	0.41228	0.35251
654.161	0.44177	0.46901	0.46402	0.42595	0.35841
655.199	0.45281	0.48412	0.47884	0.43544	0.36924
656.237	0.46452	0.50279	0.49219	0.44626	0.38243
657.274	0.47614	0.5193	0.50658	0.46056	0.39143
658.311	0.49149	0.53289	0.52182	0.47362	0.40383
659.347	0.50862	0.54854	0.53515	0.48683	0.41564
660.383	0.52412	0.56325	0.55094	0.50359	0.42334
661.419	0.54161	0.57677	0.56576	0.51823	0.43488
662.454	0.56062	0.59111	0.58425	0.52871	0.44677
663.489	0.57599	0.60876	0.60075	0.54305	0.46128
664.523	0.59453	0.62438	0.62036	0.55614	0.47541
665.557	0.61718	0.6415	0.63946	0.5699	0.49003
666.59	0.6365	0.66061	0.65967	0.58731	0.50037
667.623	0.65325	0.68018	0.67905	0.60877	0.51037
668.656	0.67219	0.70118	0.69911	0.626	0.51725
669.688	0.69068	0.71988	0.72173	0.64494	0.52635
670.719	0.70401	0.7447	0.73873	0.66634	0.53634
671.75	0.72258	0.76565	0.76083	0.68399	0.54795
672.781	0.74188	0.78872	0.78155	0.70352	0.55776
673.811	0.76423	0.80783	0.80701	0.72274	0.5714
674.841	0.78483	0.83248	0.82992	0.74326	0.58773
675.871	0.8123	0.84909	0.85924	0.7633	0.59848
676.9	0.83035	0.87392	0.88392	0.78193	0.61526
677.928	0.85544	0.89436	0.91001	0.80129	0.63424
678.956	0.87406	0.92141	0.93049	0.82409	0.65231
679.984	0.89605	0.94456	0.95343	0.84305	0.66771
681.011	0.91433	0.9728	0.97304	0.86343	0.68543
682.038	0.9338	0.99726	0.99606	0.88842	0.69144
683.064	0.94941	1.02561	1.01768	0.91205	0.70399
684.09	0.97246	1.04812	1.04458	0.93407	0.71743
685.116	0.99096	1.07613	1.06663	0.95943	0.7348
686.141	1.0122	1.09508	1.09621	0.98203	0.75436
687.165	1.03777	1.11636	1.12208	1.01146	0.76881
688.189	1.06017	1.13927	1.1493	1.03467	0.79018
689.213	1.08163	1.16303	1.17141	1.06449	0.7992
690.236	1.09957	1.18586	1.19909	1.08965	0.8081
691.259	1.12007	1.20761	1.22665	1.11326	0.81905
692.282	1.13589	1.23507	1.24945	1.13225	0.84066
693.304	1.15607	1.25603	1.27228	1.15523	0.85038
694.325	1.1712	1.27486	1.29935	1.17489	0.87048
695.346	1.19404	1.29234	1.31826	1.19792	0.89247
696.367	1.20614	1.3209	1.33033	1.22277	0.90389
697.387	1.22366	1.339	1.35076	1.24667	0.91519
698.407	1.24277	1.35579	1.37714	1.26448	0.93338
699.426	1.2611	1.37647	1.39879	1.27942	0.94388
700.445	1.26883	1.40225	1.41958	1.2965	0.95035
701.463	1.2808	1.42793	1.43827	1.31249	0.96095
702.481	1.29566	1.44737	1.45753	1.32568	0.97913
703.499	1.30773	1.47015	1.46761	1.34751	0.99404
704.516	1.31735	1.49234	1.47714	1.36602	1.01147
705.533	1.32811	1.50933	1.48825	1.38664	1.01895
706.549	1.33727	1.5223	1.50118	1.40493	1.04107
707.565	1.34925	1.5354	1.51049	1.42594	1.04556
708.58	1.35537	1.54828	1.52436	1.43886	1.05289
709.595	1.35622	1.56122	1.53702	1.45515	1.06675
710.609	1.37197	1.56456	1.55363	1.4654	1.09037
711.623	1.38281	1.56736	1.5704	1.47629	1.09931
712.637	1.38697	1.57467	1.58532	1.48264	1.12111
713.65	1.39567	1.57973	1.59236	1.49639	1.13148
714.663	1.40884	1.57759	1.60396	1.51023	1.1416
715.675	1.41228	1.57986	1.61244	1.51975	1.15638
716.687	1.41127	1.58169	1.61937	1.52912	1.16171
717.698	1.40753	1.58331	1.62204	1.53837	1.18006
718.709	1.40501	1.58351	1.62257	1.5492	1.18853
719.72	1.40389	1.58271	1.62548	1.55306	1.19614
720.73	1.39794	1.58214	1.62721	1.56751	1.19002
721.74	1.39639	1.58229	1.62756	1.57714	1.19469
722.749	1.39622	1.57608	1.63298	1.58159	1.19711
723.757	1.38811	1.57358	1.63741	1.58243	1.20849
724.766	1.38005	1.57447	1.63453	1.58876	1.21876
725.774	1.37535	1.56964	1.63492	1.58137	1.24215
726.781	1.372	1.56568	1.62921	1.58349	1.25409
727.788	1.36601	1.56396	1.62163	1.59238	1.25068
728.795	1.35839	1.55914	1.61885	1.59002	1.26109
729.801	1.34989	1.55735	1.6138	1.5846	1.27148
730.806	1.33634	1.55746	1.60282	1.58891	1.27675
731.812	1.32251	1.55297	1.597	1.58233	1.28584
732.816	1.31321	1.54054	1.59123	1.57654	1.29255
733.821	1.30688	1.52878	1.58544	1.57173	1.2927
734.825	1.29139	1.52137	1.57234	1.57392	1.28904
735.828	1.28462	1.50727	1.56195	1.5713	1.28645
736.831	1.27818	1.49156	1.55232	1.57395	1.28382
737.834	1.26511	1.48337	1.54258	1.56468	1.28647
738.836	1.24681	1.47181	1.533	1.56489	1.27948
739.838	1.24237	1.45041	1.5328	1.55419	1.27546
740.839	1.23309	1.43548	1.52863	1.54193	1.27618
741.84	1.22842	1.41454	1.52159	1.53039	1.27565
742.84	1.21467	1.39922	1.51145	1.52318	1.27383
743.84	1.2019	1.38932	1.49729	1.50462	1.29041
744.84	1.18773	1.37627	1.48348	1.49172	1.29598
745.839	1.1636	1.36593	1.47025	1.47735	1.29603
746.837	1.14001	1.35334	1.45912	1.46288	1.30021
747.836	1.12374	1.34403	1.44319	1.44698	1.30388
748.833	1.11236	1.32354	1.43282	1.43411	1.28969
749.831	1.09818	1.3037	1.41791	1.42218	1.28169
750.828	1.08857	1.28951	1.39851	1.4121	1.28257
751.824	1.07513	1.27974	1.37875	1.39257	1.28343
752.82	1.05698	1.26256	1.36084	1.38046	1.27894
753.816	1.04204	1.24819	1.3446	1.37168	1.27905
754.811	1.02841	1.23068	1.33171	1.35679	1.28155
755.805	1.01328	1.20556	1.31846	1.34804	1.26118
756.8	0.99768	1.18311	1.30619	1.33819	1.25615
757.793	0.9844	1.16668	1.29273	1.32693	1.2445
758.787	0.97012	1.14491	1.27385	1.30912	1.24174
759.78	0.9512	1.13125	1.25317	1.29393	1.23976
760.772	0.93305	1.1213	1.23269	1.27797	1.24594
761.764	0.91968	1.10943	1.21264	1.25602	1.24601
762.756	0.90719	1.08932	1.19499	1.24132	1.2468
763.747	0.89005	1.07975	1.17841	1.22714	1.23431
764.738	0.87292	1.06999	1.15681	1.217	1.21562
765.728	0.86444	1.04901	1.13897	1.2018	1.20858
766.718	0.84117	1.03817	1.11334	1.19816	1.18509
767.707	0.82522	1.01425	1.10294	1.17246	1.1728
768.696	0.81073	0.98835	1.08516	1.16251	1.15642
769.685	0.79544	0.96442	1.0691	1.14451	1.14451
770.673	0.77805	0.94082	1.05884	1.12786	1.11976
771.66	0.77019	0.91231	1.05608	1.10703	1.11406
772.648	0.75862	0.90402	1.03227	1.09692	1.10548
773.634	0.74274	0.89591	1.01254	1.07791	1.11199
774.621	0.72765	0.88489	0.99552	1.05947	1.10949
775.607	0.72027	0.87033	0.974	1.03857	1.10531
776.592	0.70314	0.86485	0.9491	1.02876	1.09356
777.577	0.68623	0.84505	0.93199	1.02259	1.0704
778.562	0.67379	0.82862	0.91474	1.00852	1.04958
779.546	0.65718	0.81477	0.9011	0.99623	1.04141
780.529	0.63813	0.80438	0.88808	0.9854	1.03064
781.513	0.6317	0.78494	0.87564	0.96632	1.0206
782.495	0.62454	0.77676	0.86279	0.94188	1.02549
783.478	0.62016	0.75513	0.85567	0.93085	1.01808
784.46	0.61109	0.73647	0.84195	0.91548	1.00556
785.441	0.60316	0.72119	0.82662	0.90619	0.99785
786.422	0.58997	0.70454	0.81886	0.89078	0.99787
787.403	0.57207	0.69211	0.80432	0.8803	0.98789
788.383	0.55644	0.69007	0.77994	0.86494	0.97363
789.363	0.54862	0.68187	0.76595	0.84871	0.96519
790.342	0.54099	0.66905	0.75314	0.83117	0.95832
791.321	0.52201	0.66356	0.72965	0.82422	0.93689
792.299	0.51196	0.64858	0.71585	0.80918	0.93042
793.277	0.49383	0.63522	0.70809	0.79553	0.92896
794.255	0.48268	0.61788	0.69339	0.79704	0.90751
795.232	0.46641	0.60862	0.68181	0.78175	0.89947
796.209	0.45761	0.59846	0.6677	0.7692	0.89283
797.185	0.45792	0.58022	0.65752	0.76206	0.86822
798.161	0.46174	0.56125	0.64841	0.75145	0.86008
799.136	0.4521	0.55673	0.63486	0.73432	0.85085
800.111	0.44362	0.54615	0.6208	0.72553	0.83049
801.085	0.4409	0.53567	0.61102	0.71333	0.81842
802.059	0.42431	0.53424	0.59267	0.70882	0.81177
803.033	0.42166	0.52172	0.58484	0.6899	0.80257
804.006	0.40776	0.51016	0.57806	0.67882	0.79874
804.979	0.39741	0.50722	0.56714	0.67445	0.78657
805.951	0.39492	0.48924	0.56607	0.65316	0.79342
806.923	0.38467	0.47912	0.56145	0.63353	0.79381
807.894	0.36392	0.48439	0.54281	0.6313	0.7778
808.865	0.36212	0.47918	0.53168	0.61864	0.77311
809.835	0.36549	0.45883	0.52828	0.60152	0.77282
810.806	0.35782	0.44925	0.51915	0.5965	0.75077
811.775	0.35436	0.4418	0.51643	0.57967	0.74377
812.744	0.3496	0.4257	0.51349	0.56856	0.74383
813.713	0.34714	0.41252	0.5056	0.56001	0.73612
814.681	0.3371	0.4129	0.48853	0.55333	0.73354
815.649	0.33189	0.41079	0.47363	0.54984	0.7263
816.617	0.32881	0.40266	0.45986	0.5475	0.71632
817.584	0.31758	0.40173	0.45158	0.5361	0.70843
818.55	0.30797	0.39453	0.4443	0.52778	0.70283
819.516	0.294	0.38893	0.4403	0.52133	0.69304
820.482	0.27641	0.38744	0.42974	0.51057	0.69257
821.447	0.26875	0.3819	0.42118	0.50166	0.68503
822.412	0.26632	0.37145	0.41385	0.49597	0.67197
823.376	0.26127	0.36624	0.40718	0.48492	0.67287
824.34	0.26012	0.35784	0.39948	0.47679	0.66932
825.304	0.26451	0.34348	0.39858	0.47087	0.65697
826.267	0.26375	0.33451	0.39298	0.46779	0.64627
827.229	0.26423	0.32837	0.38586	0.46202	0.64304
828.191	0.263	0.32345	0.37779	0.45528	0.62947
829.153	0.25443	0.32344	0.36922	0.44877	0.61703
830.114	0.25095	0.31498	0.36904	0.44262	0.61055
831.075	0.24684	0.31068	0.36311	0.43369	0.61106
832.035	0.23607	0.31153	0.35344	0.4303	0.60025
832.995	0.23105	0.30303	0.34934	0.42898	0.59112
833.955	0.22888	0.29289	0.34793	0.42452	0.5878
834.914	0.2255	0.28844	0.33997	0.41442	0.57944
835.873	0.20582	0.2943	0.32964	0.41395	0.5599
836.831	0.20926	0.28699	0.32473	0.40839	0.55306
837.788	0.20737	0.28523	0.3197	0.3966	0.55487
838.746	0.21132	0.27658	0.31537	0.38407	0.552
839.703	0.20176	0.28081	0.30319	0.38665	0.54249
840.659	0.21688	0.266	0.30195	0.37791	0.54151
841.615	0.20922	0.25777	0.3028	0.3662	0.53578
842.571	0.21277	0.24814	0.29619	0.36734	0.51508
843.526	0.2099	0.24812	0.28651	0.37121	0.49471
844.48	0.20444	0.24297	0.28173	0.3659	0.48966
845.435	0.20131	0.23805	0.27566	0.36336	0.48479
846.388	0.19564	0.23701	0.26844	0.35617	0.48002
847.342	0.18588	0.23266	0.27025	0.34033	0.48998
848.295	0.17722	0.2346	0.26884	0.3263	0.49428
849.247	0.17661	0.22934	0.26877	0.30975	0.49298
850.199	0.17378	0.22134	0.26848	0.30031	0.47891
851.151	0.18237	0.20682	0.27	0.29311	0.47159
852.102	0.17943	0.21009	0.25966	0.29693	0.45835
853.052	0.18255	0.2003	0.25782	0.29314	0.4507
854.003	0.18703	0.18852	0.25786	0.29054	0.44716
854.953	0.17962	0.18771	0.25661	0.28106	0.46433
855.902	0.1653	0.19665	0.24702	0.28329	0.45695
856.851	0.166	0.18597	0.24837	0.27693	0.44988
857.799	0.16267	0.18035	0.2432	0.2707	0.43925
858.747	0.15443	0.18561	0.23841	0.27146	0.43131
859.695	0.14921	0.1897	0.22251	0.28228	0.40118
860.642	0.15162	0.18675	0.21341	0.2879	0.38637
861.589	0.1479	0.1899	0.20722	0.28553	0.37526
862.535	0.14836	0.18857	0.20597	0.28585	0.37538
863.481	0.15688	0.17583	0.20572	0.27789	0.3738
864.427	0.14988	0.17526	0.20548	0.27239	0.37081
865.372	0.15316	0.1673	0.21074	0.26279	0.37221
866.316	0.15129	0.16536	0.20767	0.2608	0.37392
867.26	0.14724	0.15898	0.20985	0.25828	0.3758
868.204	0.13585	0.16812	0.20468	0.26073	0.37231
869.147	0.1395	0.16057	0.20528	0.25293	0.37929
870.09	0.13035	0.16465	0.19765	0.25351	0.371
871.032	0.13024	0.15712	0.19665	0.24692	0.37502
871.974	0.12516	0.15847	0.19087	0.23775	0.37633
872.916	0.12584	0.15069	0.18881	0.22885	0.37664
873.857	0.12631	0.14751	0.1899	0.21913	0.38071
874.797	0.12137	0.14289	0.1894	0.2103	0.38876
875.737	0.11405	0.14771	0.18354	0.21124	0.37354
876.677	0.1125	0.14528	0.18135	0.21481	0.35664
877.616	0.11189	0.14563	0.17672	0.21506	0.34995
878.555	0.10591	0.14678	0.17235	0.21737	0.34449
879.494	0.10527	0.1462	0.17119	0.21456	0.3383
880.432	0.10603	0.14183	0.17141	0.20801	0.34341
881.369	0.10101	0.14458	0.16688	0.2006	0.34703
882.306	0.09618	0.14406	0.16215	0.19894	0.33878
883.243	0.1015	0.13851	0.1627	0.19568	0.33333
884.179	0.1051	0.12935	0.16426	0.19328	0.33404
885.115	0.1075	0.12564	0.1615	0.19592	0.32568
886.05	0.11179	0.11771	0.16312	0.19252	0.3289
886.985	0.10863	0.11827	0.16113	0.18896	0.33342
887.919	0.10672	0.11676	0.15695	0.19197	0.32171
888.853	0.10564	0.12133	0.15212	0.18584	0.32768
889.787	0.10107	0.12252	0.14755	0.18217	0.3215
890.72	0.0993	0.12537	0.14318	0.18381	0.31134
891.653	0.10028	0.12339	0.14227	0.18293	0.30668
892.585	0.09571	0.12624	0.13927	0.17908	0.31205
893.517	0.09291	0.1262	0.13541	0.17967	0.30041
894.448	0.09227	0.12345	0.13454	0.17477	0.30122
895.379	0.08869	0.12194	0.13107	0.17167	0.29747
896.309	0.08945	0.11678	0.13377	0.16789	0.28362
897.24	0.09036	0.11122	0.13352	0.16174	0.27458
898.169	0.09112	0.10734	0.13456	0.15972	0.26996
899.098	0.09107	0.10555	0.1376	0.15762	0.26708

## Sheet: Tabelle4
Raw data Figure 7d: gold nanorod diameter data
3.92952e-08	3.89154e-08	3.85511e-08	3.82012e-08	3.78649e-08	3.75412e-08	3.72294e-08	3.69287e-08	3.66385e-08	3.63582e-08	3.60873e-08	3.58252e-08	3.55714e-08	3.53255e-08	3.50871e-08	3.48559e-08	3.46315e-08	3.44134e-08	3.42016e-08	3.39956e-08	3.37951e-08	3.36001e-08	3.34101e-08	3.3225e-08	3.30446e-08	3.28686e-08	3.2697e-08	3.25295e-08	3.23659e-08	3.22062e-08	3.20501e-08	3.18975e-08	3.17483e-08	3.16024e-08	3.14596e-08	3.13199e-08	3.11831e-08	3.10491e-08	3.09178e-08	3.07892e-08	3.06631e-08	3.05395e-08	3.04183e-08	3.02994e-08	3.01827e-08	3.00682e-08	2.99558e-08	2.98455e-08	2.97371e-08	2.96306e-08
3.96242e-08	3.92413e-08	3.8874e-08	3.85212e-08	3.8182e-08	3.78556e-08	3.75412e-08	3.7238e-08	3.69454e-08	3.66628e-08	3.63896e-08	3.61253e-08	3.58694e-08	3.56215e-08	3.53811e-08	3.5148e-08	3.49216e-08	3.47018e-08	3.44882e-08	3.42804e-08	3.40783e-08	3.38816e-08	3.36901e-08	3.35034e-08	3.33215e-08	3.31441e-08	3.29711e-08	3.28021e-08	3.26372e-08	3.24762e-08	3.23188e-08	3.21649e-08	3.20145e-08	3.18674e-08	3.17234e-08	3.15825e-08	3.14446e-08	3.13095e-08	3.11771e-08	3.10474e-08	3.09203e-08	3.07957e-08	3.06735e-08	3.05536e-08	3.04359e-08	3.03205e-08	3.02071e-08	3.00959e-08	2.99866e-08	2.98792e-08
3.98487e-08	3.94636e-08	3.90942e-08	3.87394e-08	3.83984e-08	3.80701e-08	3.77539e-08	3.7449e-08	3.71548e-08	3.68706e-08	3.65958e-08	3.633e-08	3.60727e-08	3.58233e-08	3.55816e-08	3.53472e-08	3.51196e-08	3.48985e-08	3.46836e-08	3.44748e-08	3.42715e-08	3.40737e-08	3.38811e-08	3.36934e-08	3.35104e-08	3.3332e-08	3.3158e-08	3.29881e-08	3.28223e-08	3.26603e-08	3.2502e-08	3.23473e-08	3.21961e-08	3.20481e-08	3.19033e-08	3.17616e-08	3.16229e-08	3.14871e-08	3.1354e-08	3.12236e-08	3.10957e-08	3.09704e-08	3.08475e-08	3.07269e-08	3.06086e-08	3.04925e-08	3.03786e-08	3.02666e-08	3.01567e-08	3.00488e-08
4.00335e-08	3.96466e-08	3.92755e-08	3.89191e-08	3.85765e-08	3.82467e-08	3.7929e-08	3.76227e-08	3.73271e-08	3.70416e-08	3.67656e-08	3.64985e-08	3.624e-08	3.59895e-08	3.57467e-08	3.55112e-08	3.52825e-08	3.50604e-08	3.48446e-08	3.46347e-08	3.44306e-08	3.42318e-08	3.40383e-08	3.38498e-08	3.3666e-08	3.34868e-08	3.33119e-08	3.31413e-08	3.29747e-08	3.28119e-08	3.26529e-08	3.24975e-08	3.23455e-08	3.21969e-08	3.20515e-08	3.19091e-08	3.17698e-08	3.16333e-08	3.14996e-08	3.13686e-08	3.12401e-08	3.11142e-08	3.09908e-08	3.08696e-08	3.07508e-08	3.06342e-08	3.05197e-08	3.04073e-08	3.02969e-08	3.01884e-08
4.01977e-08	3.98092e-08	3.94365e-08	3.90787e-08	3.87347e-08	3.84036e-08	3.80846e-08	3.7777e-08	3.74802e-08	3.71935e-08	3.69164e-08	3.66482e-08	3.63886e-08	3.61372e-08	3.58933e-08	3.56568e-08	3.54272e-08	3.52042e-08	3.49875e-08	3.47768e-08	3.45718e-08	3.43723e-08	3.4178e-08	3.39886e-08	3.38041e-08	3.36242e-08	3.34486e-08	3.32773e-08	3.311e-08	3.29466e-08	3.27869e-08	3.26309e-08	3.24783e-08	3.23291e-08	3.2183e-08	3.20401e-08	3.19002e-08	3.17631e-08	3.16289e-08	3.14974e-08	3.13684e-08	3.1242e-08	3.1118e-08	3.09964e-08	3.08771e-08	3.076e-08	3.0645e-08	3.05322e-08	3.04213e-08	3.03124e-08
4.03494e-08	3.99594e-08	3.95854e-08	3.92262e-08	3.88809e-08	3.85485e-08	3.82283e-08	3.79196e-08	3.76217e-08	3.73339e-08	3.70557e-08	3.67866e-08	3.6526e-08	3.62736e-08	3.60289e-08	3.57915e-08	3.5561e-08	3.53372e-08	3.51196e-08	3.49081e-08	3.47024e-08	3.45021e-08	3.4307e-08	3.4117e-08	3.39318e-08	3.37512e-08	3.35749e-08	3.3403e-08	3.3235e-08	3.3071e-08	3.29108e-08	3.27542e-08	3.2601e-08	3.24512e-08	3.23046e-08	3.21612e-08	3.20207e-08	3.18832e-08	3.17484e-08	3.16164e-08	3.1487e-08	3.13601e-08	3.12356e-08	3.11136e-08	3.09938e-08	3.08763e-08	3.07609e-08	3.06476e-08	3.05363e-08	3.0427e-08
4.04936e-08	4.01023e-08	3.97269e-08	3.93664e-08	3.90199e-08	3.86863e-08	3.8365e-08	3.80552e-08	3.77562e-08	3.74674e-08	3.71882e-08	3.69181e-08	3.66567e-08	3.64033e-08	3.61577e-08	3.59195e-08	3.56882e-08	3.54636e-08	3.52453e-08	3.5033e-08	3.48265e-08	3.46255e-08	3.44298e-08	3.42391e-08	3.40532e-08	3.38719e-08	3.36951e-08	3.35225e-08	3.3354e-08	3.31894e-08	3.30286e-08	3.28714e-08	3.27177e-08	3.25673e-08	3.24203e-08	3.22763e-08	3.21353e-08	3.19973e-08	3.18621e-08	3.17296e-08	3.15997e-08	3.14724e-08	3.13475e-08	3.1225e-08	3.11048e-08	3.09868e-08	3.0871e-08	3.07573e-08	3.06457e-08	3.0536e-08
4.06336e-08	4.0241e-08	3.98643e-08	3.95026e-08	3.91548e-08	3.88201e-08	3.84977e-08	3.81868e-08	3.78868e-08	3.7597e-08	3.73169e-08	3.70458e-08	3.67835e-08	3.65292e-08	3.62828e-08	3.60437e-08	3.58117e-08	3.55863e-08	3.53672e-08	3.51542e-08	3.4947e-08	3.47453e-08	3.45489e-08	3.43575e-08	3.4171e-08	3.39891e-08	3.38117e-08	3.36385e-08	3.34694e-08	3.33043e-08	3.31429e-08	3.29852e-08	3.28309e-08	3.26801e-08	3.25325e-08	3.2388e-08	3.22466e-08	3.21081e-08	3.19724e-08	3.18394e-08	3.17091e-08	3.15813e-08	3.1456e-08	3.13331e-08	3.12125e-08	3.10941e-08	3.0978e-08	3.08639e-08	3.07518e-08	3.06418e-08
4.07718e-08	4.03778e-08	3.99999e-08	3.96369e-08	3.9288e-08	3.89522e-08	3.86287e-08	3.83167e-08	3.80157e-08	3.77249e-08	3.74438e-08	3.71719e-08	3.69086e-08	3.66535e-08	3.64062e-08	3.61664e-08	3.59335e-08	3.57073e-08	3.54876e-08	3.52738e-08	3.50659e-08	3.48636e-08	3.46665e-08	3.44745e-08	3.42873e-08	3.41048e-08	3.39268e-08	3.3753e-08	3.35833e-08	3.34176e-08	3.32557e-08	3.30974e-08	3.29427e-08	3.27913e-08	3.26432e-08	3.24983e-08	3.23564e-08	3.22174e-08	3.20813e-08	3.19479e-08	3.18171e-08	3.16889e-08	3.15632e-08	3.14398e-08	3.13188e-08	3.12001e-08	3.10835e-08	3.0969e-08	3.08566e-08	3.07462e-08
4.091e-08	4.05147e-08	4.01355e-08	3.97713e-08	3.94212e-08	3.90842e-08	3.87596e-08	3.84466e-08	3.81446e-08	3.78528e-08	3.75708e-08	3.72979e-08	3.70337e-08	3.67778e-08	3.65297e-08	3.6289e-08	3.60554e-08	3.58284e-08	3.56079e-08	3.53935e-08	3.51849e-08	3.49818e-08	3.47841e-08	3.45914e-08	3.44036e-08	3.42205e-08	3.40419e-08	3.38675e-08	3.36973e-08	3.3531e-08	3.33685e-08	3.32098e-08	3.30545e-08	3.29026e-08	3.2754e-08	3.26086e-08	3.24662e-08	3.23268e-08	3.21902e-08	3.20563e-08	3.19251e-08	3.17965e-08	3.16703e-08	3.15466e-08	3.14252e-08	3.1306e-08	3.1189e-08	3.10742e-08	3.09614e-08	3.08506e-08
4.10496e-08	4.06529e-08	4.02724e-08	3.9907e-08	3.95557e-08	3.92176e-08	3.88919e-08	3.85778e-08	3.82747e-08	3.7982e-08	3.7699e-08	3.74252e-08	3.71601e-08	3.69033e-08	3.66544e-08	3.64129e-08	3.61784e-08	3.59507e-08	3.57295e-08	3.55143e-08	3.5305e-08	3.51012e-08	3.49028e-08	3.47095e-08	3.45211e-08	3.43373e-08	3.41581e-08	3.39831e-08	3.38123e-08	3.36455e-08	3.34825e-08	3.33232e-08	3.31674e-08	3.3015e-08	3.28659e-08	3.272e-08	3.25771e-08	3.24372e-08	3.23001e-08	3.21658e-08	3.20342e-08	3.19051e-08	3.17785e-08	3.16544e-08	3.15325e-08	3.1413e-08	3.12956e-08	3.11804e-08	3.10672e-08	3.0956e-08
4.11916e-08	4.07936e-08	4.04117e-08	4.00451e-08	3.96925e-08	3.93533e-08	3.90265e-08	3.87113e-08	3.84072e-08	3.81134e-08	3.78294e-08	3.75547e-08	3.72887e-08	3.70311e-08	3.67812e-08	3.65389e-08	3.63037e-08	3.60752e-08	3.58531e-08	3.56372e-08	3.54272e-08	3.52227e-08	3.50237e-08	3.48297e-08	3.46406e-08	3.44562e-08	3.42764e-08	3.41008e-08	3.39294e-08	3.3762e-08	3.35984e-08	3.34386e-08	3.32822e-08	3.31293e-08	3.29797e-08	3.28333e-08	3.26899e-08	3.25496e-08	3.2412e-08	3.22772e-08	3.21452e-08	3.20156e-08	3.18886e-08	3.1764e-08	3.16418e-08	3.15218e-08	3.14041e-08	3.12884e-08	3.11749e-08	3.10633e-08
4.13368e-08	4.09374e-08	4.05542e-08	4.01863e-08	3.98325e-08	3.9492e-08	3.91641e-08	3.88478e-08	3.85426e-08	3.82478e-08	3.79629e-08	3.76872e-08	3.74203e-08	3.71617e-08	3.6911e-08	3.66678e-08	3.64317e-08	3.62024e-08	3.59796e-08	3.5763e-08	3.55522e-08	3.5347e-08	3.51472e-08	3.49526e-08	3.47628e-08	3.45778e-08	3.43973e-08	3.42211e-08	3.40492e-08	3.38812e-08	3.3717e-08	3.35566e-08	3.33997e-08	3.32463e-08	3.30961e-08	3.29492e-08	3.28053e-08	3.26645e-08	3.25264e-08	3.23912e-08	3.22586e-08	3.21287e-08	3.20012e-08	3.18762e-08	3.17535e-08	3.16331e-08	3.1515e-08	3.13989e-08	3.1285e-08	3.1173e-08
4.14857e-08	4.10848e-08	4.07003e-08	4.0331e-08	3.9976e-08	3.96343e-08	3.93052e-08	3.89878e-08	3.86815e-08	3.83856e-08	3.80996e-08	3.78229e-08	3.75551e-08	3.72956e-08	3.7044e-08	3.67999e-08	3.6563e-08	3.63329e-08	3.61093e-08	3.58918e-08	3.56803e-08	3.54744e-08	3.52739e-08	3.50785e-08	3.48881e-08	3.47025e-08	3.45213e-08	3.43445e-08	3.41719e-08	3.40033e-08	3.38386e-08	3.36776e-08	3.35201e-08	3.33661e-08	3.32155e-08	3.3068e-08	3.29236e-08	3.27823e-08	3.26437e-08	3.2508e-08	3.2375e-08	3.22446e-08	3.21167e-08	3.19912e-08	3.18681e-08	3.17473e-08	3.16287e-08	3.15122e-08	3.13978e-08	3.12855e-08
4.16384e-08	4.12361e-08	4.08501e-08	4.04795e-08	4.01232e-08	3.97802e-08	3.94499e-08	3.91313e-08	3.88239e-08	3.8527e-08	3.82399e-08	3.79622e-08	3.76934e-08	3.74329e-08	3.71804e-08	3.69354e-08	3.66976e-08	3.64667e-08	3.62423e-08	3.6024e-08	3.58117e-08	3.56051e-08	3.54038e-08	3.52078e-08	3.50166e-08	3.48303e-08	3.46485e-08	3.4471e-08	3.42978e-08	3.41286e-08	3.39633e-08	3.38017e-08	3.36436e-08	3.34891e-08	3.33379e-08	3.31899e-08	3.3045e-08	3.29031e-08	3.27641e-08	3.26278e-08	3.24943e-08	3.23634e-08	3.2235e-08	3.21091e-08	3.19856e-08	3.18643e-08	3.17453e-08	3.16284e-08	3.15136e-08	3.14009e-08
4.17946e-08	4.13908e-08	4.10034e-08	4.06313e-08	4.02737e-08	3.99295e-08	3.95979e-08	3.92781e-08	3.89696e-08	3.86715e-08	3.83834e-08	3.81047e-08	3.78348e-08	3.75734e-08	3.73199e-08	3.7074e-08	3.68354e-08	3.66036e-08	3.63783e-08	3.61592e-08	3.59461e-08	3.57387e-08	3.55367e-08	3.53399e-08	3.51481e-08	3.4961e-08	3.47786e-08	3.46005e-08	3.44266e-08	3.42567e-08	3.40908e-08	3.39286e-08	3.377e-08	3.36148e-08	3.34631e-08	3.33145e-08	3.31691e-08	3.30266e-08	3.28871e-08	3.27504e-08	3.26164e-08	3.2485e-08	3.23561e-08	3.22297e-08	3.21057e-08	3.1984e-08	3.18645e-08	3.17472e-08	3.1632e-08	3.15189e-08
4.19536e-08	4.15483e-08	4.11594e-08	4.0786e-08	4.04269e-08	4.00814e-08	3.97486e-08	3.94276e-08	3.91179e-08	3.88187e-08	3.85295e-08	3.82497e-08	3.79788e-08	3.77164e-08	3.7462e-08	3.72152e-08	3.69756e-08	3.67429e-08	3.65168e-08	3.62969e-08	3.6083e-08	3.58748e-08	3.5672e-08	3.54745e-08	3.52819e-08	3.50942e-08	3.4911e-08	3.47322e-08	3.45577e-08	3.43872e-08	3.42206e-08	3.40578e-08	3.38986e-08	3.37429e-08	3.35905e-08	3.34414e-08	3.32954e-08	3.31525e-08	3.30124e-08	3.28752e-08	3.27407e-08	3.26088e-08	3.24794e-08	3.23526e-08	3.22281e-08	3.21059e-08	3.1986e-08	3.18682e-08	3.17526e-08	3.1639e-08
4.21145e-08	4.17076e-08	4.13172e-08	4.09424e-08	4.0582e-08	4.02352e-08	3.9901e-08	3.95789e-08	3.92679e-08	3.89676e-08	3.86773e-08	3.83964e-08	3.81245e-08	3.78611e-08	3.76057e-08	3.73579e-08	3.71175e-08	3.68839e-08	3.66569e-08	3.64362e-08	3.62214e-08	3.60124e-08	3.58089e-08	3.56106e-08	3.54173e-08	3.52289e-08	3.5045e-08	3.48655e-08	3.46903e-08	3.45192e-08	3.4352e-08	3.41885e-08	3.40287e-08	3.38724e-08	3.37195e-08	3.35698e-08	3.34233e-08	3.32798e-08	3.31392e-08	3.30014e-08	3.28664e-08	3.2734e-08	3.26042e-08	3.24768e-08	3.23519e-08	3.22292e-08	3.21088e-08	3.19906e-08	3.18746e-08	3.17605e-08
4.22759e-08	4.18674e-08	4.14756e-08	4.10993e-08	4.07375e-08	4.03894e-08	4.0054e-08	3.97306e-08	3.94184e-08	3.9117e-08	3.88255e-08	3.85436e-08	3.82707e-08	3.80062e-08	3.77499e-08	3.75012e-08	3.72598e-08	3.70253e-08	3.67974e-08	3.65759e-08	3.63603e-08	3.61505e-08	3.59462e-08	3.57472e-08	3.55532e-08	3.5364e-08	3.51794e-08	3.49992e-08	3.48234e-08	3.46516e-08	3.44837e-08	3.43197e-08	3.41593e-08	3.40024e-08	3.38489e-08	3.36986e-08	3.35515e-08	3.34075e-08	3.32663e-08	3.3128e-08	3.29925e-08	3.28596e-08	3.27293e-08	3.26015e-08	3.2476e-08	3.23529e-08	3.22321e-08	3.21134e-08	3.19969e-08	3.18825e-08
4.24365e-08	4.20265e-08	4.16332e-08	4.12554e-08	4.08923e-08	4.05428e-08	4.02061e-08	3.98815e-08	3.95682e-08	3.92656e-08	3.89731e-08	3.86901e-08	3.84161e-08	3.81507e-08	3.78933e-08	3.76437e-08	3.74014e-08	3.7166e-08	3.69373e-08	3.67149e-08	3.64985e-08	3.6288e-08	3.60829e-08	3.58831e-08	3.56883e-08	3.54984e-08	3.53131e-08	3.51323e-08	3.49558e-08	3.47833e-08	3.46149e-08	3.44502e-08	3.42892e-08	3.41317e-08	3.39776e-08	3.38268e-08	3.36791e-08	3.35345e-08	3.33929e-08	3.32541e-08	3.3118e-08	3.29846e-08	3.28538e-08	3.27255e-08	3.25996e-08	3.2476e-08	3.23547e-08	3.22356e-08	3.21187e-08	3.20038e-08
4.25952e-08	4.21836e-08	4.17888e-08	4.14097e-08	4.10452e-08	4.06944e-08	4.03565e-08	4.00307e-08	3.97162e-08	3.94125e-08	3.91189e-08	3.88348e-08	3.85598e-08	3.82934e-08	3.80351e-08	3.77845e-08	3.75413e-08	3.73051e-08	3.70755e-08	3.68523e-08	3.66351e-08	3.64237e-08	3.62179e-08	3.60173e-08	3.58219e-08	3.56312e-08	3.54453e-08	3.52638e-08	3.50866e-08	3.49135e-08	3.47444e-08	3.45791e-08	3.44175e-08	3.42594e-08	3.41048e-08	3.39534e-08	3.38052e-08	3.36601e-08	3.35179e-08	3.33786e-08	3.3242e-08	3.31081e-08	3.29768e-08	3.2848e-08	3.27217e-08	3.25976e-08	3.24759e-08	3.23564e-08	3.2239e-08	3.21237e-08
4.2751e-08	4.2338e-08	4.19417e-08	4.15612e-08	4.11954e-08	4.08433e-08	4.05042e-08	4.01772e-08	3.98615e-08	3.95567e-08	3.9262e-08	3.89769e-08	3.87009e-08	3.84335e-08	3.81743e-08	3.79228e-08	3.76787e-08	3.74416e-08	3.72112e-08	3.69872e-08	3.67692e-08	3.65571e-08	3.63505e-08	3.61492e-08	3.5953e-08	3.57617e-08	3.55751e-08	3.53929e-08	3.52151e-08	3.50414e-08	3.48716e-08	3.47058e-08	3.45436e-08	3.43849e-08	3.42297e-08	3.40778e-08	3.3929e-08	3.37833e-08	3.36407e-08	3.35008e-08	3.33638e-08	3.32294e-08	3.30976e-08	3.29684e-08	3.28415e-08	3.27171e-08	3.25949e-08	3.24749e-08	3.23571e-08	3.22414e-08
4.29035e-08	4.24889e-08	4.20913e-08	4.17094e-08	4.13423e-08	4.0989e-08	4.06486e-08	4.03204e-08	4.00037e-08	3.96978e-08	3.9402e-08	3.91159e-08	3.88389e-08	3.85706e-08	3.83104e-08	3.80581e-08	3.78131e-08	3.75752e-08	3.73439e-08	3.71191e-08	3.69004e-08	3.66875e-08	3.64802e-08	3.62782e-08	3.60813e-08	3.58893e-08	3.5702e-08	3.55192e-08	3.53407e-08	3.51664e-08	3.49961e-08	3.48296e-08	3.46668e-08	3.45076e-08	3.43519e-08	3.41994e-08	3.40501e-08	3.39039e-08	3.37607e-08	3.36204e-08	3.34829e-08	3.3348e-08	3.32158e-08	3.30861e-08	3.29588e-08	3.28339e-08	3.27113e-08	3.25909e-08	3.24727e-08	3.23565e-08
4.30523e-08	4.26364e-08	4.22374e-08	4.18542e-08	4.14858e-08	4.11312e-08	4.07897e-08	4.04604e-08	4.01426e-08	3.98356e-08	3.95388e-08	3.92517e-08	3.89738e-08	3.87045e-08	3.84434e-08	3.81902e-08	3.79444e-08	3.77056e-08	3.74736e-08	3.7248e-08	3.70285e-08	3.68149e-08	3.66068e-08	3.64042e-08	3.62066e-08	3.60139e-08	3.5826e-08	3.56426e-08	3.54635e-08	3.52886e-08	3.51177e-08	3.49506e-08	3.47873e-08	3.46275e-08	3.44712e-08	3.43182e-08	3.41684e-08	3.40217e-08	3.38781e-08	3.37372e-08	3.35992e-08	3.34639e-08	3.33312e-08	3.32011e-08	3.30734e-08	3.2948e-08	3.2825e-08	3.27042e-08	3.25856e-08	3.2469e-08
4.31978e-08	4.27804e-08	4.238e-08	4.19956e-08	4.16259e-08	4.12702e-08	4.09275e-08	4.05971e-08	4.02782e-08	3.99702e-08	3.96724e-08	3.93843e-08	3.91055e-08	3.88353e-08	3.85733e-08	3.83193e-08	3.80726e-08	3.7833e-08	3.76002e-08	3.73739e-08	3.71537e-08	3.69393e-08	3.67306e-08	3.65272e-08	3.6329e-08	3.61357e-08	3.59471e-08	3.57631e-08	3.55834e-08	3.54079e-08	3.52364e-08	3.50688e-08	3.49049e-08	3.47446e-08	3.45878e-08	3.44343e-08	3.4284e-08	3.41368e-08	3.39926e-08	3.38514e-08	3.37129e-08	3.35771e-08	3.3444e-08	3.33134e-08	3.31852e-08	3.30595e-08	3.2936e-08	3.28148e-08	3.26958e-08	3.25789e-08
4.33401e-08	4.29214e-08	4.25197e-08	4.2134e-08	4.17631e-08	4.14062e-08	4.10624e-08	4.07309e-08	4.0411e-08	4.01019e-08	3.98032e-08	3.95142e-08	3.92344e-08	3.89633e-08	3.87005e-08	3.84456e-08	3.81981e-08	3.79578e-08	3.77242e-08	3.74971e-08	3.72762e-08	3.70611e-08	3.68517e-08	3.66477e-08	3.64488e-08	3.62548e-08	3.60657e-08	3.5881e-08	3.57007e-08	3.55247e-08	3.53526e-08	3.51845e-08	3.502e-08	3.48592e-08	3.47019e-08	3.45479e-08	3.43971e-08	3.42494e-08	3.41048e-08	3.39631e-08	3.38241e-08	3.36879e-08	3.35544e-08	3.34233e-08	3.32948e-08	3.31686e-08	3.30448e-08	3.29232e-08	3.28037e-08	3.26864e-08
4.348e-08	4.30599e-08	4.2657e-08	4.227e-08	4.18979e-08	4.15399e-08	4.1195e-08	4.08624e-08	4.05414e-08	4.02314e-08	3.99317e-08	3.96417e-08	3.93611e-08	3.90891e-08	3.88255e-08	3.85697e-08	3.83215e-08	3.80804e-08	3.7846e-08	3.76182e-08	3.73965e-08	3.71808e-08	3.69707e-08	3.6766e-08	3.65665e-08	3.63719e-08	3.61821e-08	3.59969e-08	3.58161e-08	3.56394e-08	3.54668e-08	3.52981e-08	3.51332e-08	3.49718e-08	3.4814e-08	3.46595e-08	3.45082e-08	3.43601e-08	3.4215e-08	3.40728e-08	3.39334e-08	3.37968e-08	3.36628e-08	3.35314e-08	3.34024e-08	3.32758e-08	3.31516e-08	3.30296e-08	3.29098e-08	3.27921e-08
4.36181e-08	4.31967e-08	4.27924e-08	4.24042e-08	4.2031e-08	4.16718e-08	4.13258e-08	4.09922e-08	4.06702e-08	4.03592e-08	4.00585e-08	3.97677e-08	3.94861e-08	3.92133e-08	3.89488e-08	3.86923e-08	3.84432e-08	3.82013e-08	3.79663e-08	3.77377e-08	3.75154e-08	3.72989e-08	3.70882e-08	3.68829e-08	3.66827e-08	3.64875e-08	3.62971e-08	3.61113e-08	3.59299e-08	3.57527e-08	3.55795e-08	3.54103e-08	3.52449e-08	3.5083e-08	3.49247e-08	3.47697e-08	3.46179e-08	3.44693e-08	3.43238e-08	3.41811e-08	3.40413e-08	3.39043e-08	3.37698e-08	3.3638e-08	3.35086e-08	3.33816e-08	3.3257e-08	3.31346e-08	3.30145e-08	3.28964e-08
4.37551e-08	4.33324e-08	4.29268e-08	4.25374e-08	4.2163e-08	4.18027e-08	4.14556e-08	4.1121e-08	4.0798e-08	4.0486e-08	4.01844e-08	3.98926e-08	3.96102e-08	3.93365e-08	3.90712e-08	3.88138e-08	3.8564e-08	3.83214e-08	3.80856e-08	3.78563e-08	3.76333e-08	3.74162e-08	3.72048e-08	3.69988e-08	3.6798e-08	3.66022e-08	3.64112e-08	3.62248e-08	3.60428e-08	3.58651e-08	3.56914e-08	3.55217e-08	3.53557e-08	3.51933e-08	3.50345e-08	3.4879e-08	3.47268e-08	3.45777e-08	3.44317e-08	3.42886e-08	3.41484e-08	3.40109e-08	3.38761e-08	3.37438e-08	3.3614e-08	3.34867e-08	3.33616e-08	3.32389e-08	3.31183e-08	3.29999e-08
4.38918e-08	4.34678e-08	4.3061e-08	4.26704e-08	4.22948e-08	4.19334e-08	4.15852e-08	4.12495e-08	4.09255e-08	4.06125e-08	4.031e-08	4.00173e-08	3.9734e-08	3.94595e-08	3.91934e-08	3.89352e-08	3.86846e-08	3.84412e-08	3.82047e-08	3.79747e-08	3.7751e-08	3.75332e-08	3.73211e-08	3.71145e-08	3.69131e-08	3.67167e-08	3.65251e-08	3.63381e-08	3.61556e-08	3.59773e-08	3.58031e-08	3.56328e-08	3.54663e-08	3.53034e-08	3.51441e-08	3.49881e-08	3.48355e-08	3.46859e-08	3.45395e-08	3.43959e-08	3.42553e-08	3.41173e-08	3.39821e-08	3.38494e-08	3.37192e-08	3.35915e-08	3.34661e-08	3.33429e-08	3.3222e-08	3.31032e-08
4.40291e-08	4.36037e-08	4.31957e-08	4.28038e-08	4.24271e-08	4.20646e-08	4.17153e-08	4.13785e-08	4.10535e-08	4.07396e-08	4.04361e-08	4.01425e-08	3.98583e-08	3.95829e-08	3.9316e-08	3.9057e-08	3.88056e-08	3.85615e-08	3.83242e-08	3.80935e-08	3.78691e-08	3.76506e-08	3.74379e-08	3.72306e-08	3.70286e-08	3.68316e-08	3.66394e-08	3.64519e-08	3.62688e-08	3.60899e-08	3.59151e-08	3.57443e-08	3.55773e-08	3.54139e-08	3.52541e-08	3.50977e-08	3.49445e-08	3.47945e-08	3.46476e-08	3.45036e-08	3.43625e-08	3.42242e-08	3.40885e-08	3.39554e-08	3.38248e-08	3.36967e-08	3.35709e-08	3.34474e-08	3.33261e-08	3.32069e-08
4.41677e-08	4.3741e-08	4.33317e-08	4.29386e-08	4.25607e-08	4.2197e-08	4.18466e-08	4.15088e-08	4.11828e-08	4.08679e-08	4.05634e-08	4.02689e-08	3.99838e-08	3.97076e-08	3.94398e-08	3.918e-08	3.89278e-08	3.86829e-08	3.84449e-08	3.82135e-08	3.79884e-08	3.77692e-08	3.75558e-08	3.73479e-08	3.71453e-08	3.69476e-08	3.67549e-08	3.65667e-08	3.6383e-08	3.62036e-08	3.60283e-08	3.58569e-08	3.56894e-08	3.55255e-08	3.53652e-08	3.52083e-08	3.50546e-08	3.49042e-08	3.47568e-08	3.46124e-08	3.44708e-08	3.43321e-08	3.4196e-08	3.40625e-08	3.39315e-08	3.38029e-08	3.36767e-08	3.35528e-08	3.34311e-08	3.33116e-08
4.43084e-08	4.38803e-08	4.34697e-08	4.30754e-08	4.26963e-08	4.23314e-08	4.198e-08	4.16411e-08	4.1314e-08	4.09981e-08	4.06927e-08	4.03973e-08	4.01112e-08	3.98341e-08	3.95655e-08	3.93049e-08	3.90519e-08	3.88062e-08	3.85675e-08	3.83353e-08	3.81095e-08	3.78896e-08	3.76755e-08	3.7467e-08	3.72637e-08	3.70654e-08	3.6872e-08	3.66833e-08	3.6499e-08	3.6319e-08	3.61432e-08	3.59713e-08	3.58032e-08	3.56388e-08	3.5478e-08	3.53206e-08	3.51664e-08	3.50155e-08	3.48677e-08	3.47228e-08	3.45808e-08	3.44416e-08	3.4305e-08	3.41711e-08	3.40397e-08	3.39108e-08	3.37842e-08	3.36599e-08	3.35378e-08	3.34179e-08
4.44521e-08	4.40226e-08	4.36107e-08	4.32151e-08	4.28347e-08	4.24687e-08	4.21161e-08	4.17761e-08	4.1448e-08	4.1131e-08	4.08247e-08	4.05283e-08	4.02413e-08	3.99633e-08	3.96938e-08	3.94324e-08	3.91786e-08	3.89321e-08	3.86926e-08	3.84597e-08	3.82331e-08	3.80125e-08	3.77978e-08	3.75885e-08	3.73846e-08	3.71857e-08	3.69917e-08	3.68023e-08	3.66174e-08	3.64369e-08	3.62605e-08	3.6088e-08	3.59194e-08	3.57545e-08	3.55931e-08	3.54352e-08	3.52806e-08	3.51292e-08	3.49809e-08	3.48355e-08	3.46931e-08	3.45534e-08	3.44164e-08	3.42821e-08	3.41502e-08	3.40209e-08	3.38939e-08	3.37692e-08	3.36467e-08	3.35264e-08
4.45996e-08	4.41687e-08	4.37554e-08	4.33585e-08	4.29769e-08	4.26097e-08	4.22559e-08	4.19148e-08	4.15856e-08	4.12676e-08	4.09602e-08	4.06628e-08	4.03749e-08	4.0096e-08	3.98256e-08	3.95633e-08	3.93087e-08	3.90614e-08	3.8821e-08	3.85874e-08	3.836e-08	3.81388e-08	3.79233e-08	3.77134e-08	3.75087e-08	3.73092e-08	3.71145e-08	3.69246e-08	3.67391e-08	3.65579e-08	3.63809e-08	3.62079e-08	3.60387e-08	3.58733e-08	3.57114e-08	3.55529e-08	3.53978e-08	3.52459e-08	3.50971e-08	3.49513e-08	3.48083e-08	3.46682e-08	3.45308e-08	3.4396e-08	3.42637e-08	3.41339e-08	3.40065e-08	3.38814e-08	3.37586e-08	3.36379e-08
4.47519e-08	4.43196e-08	4.39049e-08	4.35066e-08	4.31237e-08	4.27552e-08	4.24002e-08	4.2058e-08	4.17276e-08	4.14086e-08	4.11001e-08	4.08017e-08	4.05129e-08	4.0233e-08	3.99617e-08	3.96985e-08	3.9443e-08	3.91948e-08	3.89537e-08	3.87192e-08	3.84911e-08	3.82691e-08	3.80529e-08	3.78422e-08	3.76369e-08	3.74367e-08	3.72414e-08	3.70508e-08	3.68647e-08	3.66829e-08	3.65053e-08	3.63317e-08	3.61619e-08	3.59959e-08	3.58335e-08	3.56745e-08	3.55188e-08	3.53664e-08	3.52171e-08	3.50708e-08	3.49274e-08	3.47868e-08	3.46489e-08	3.45136e-08	3.43809e-08	3.42507e-08	3.41229e-08	3.39973e-08	3.38741e-08	3.3753e-08
4.491e-08	4.44761e-08	4.40599e-08	4.36603e-08	4.3276e-08	4.29062e-08	4.255e-08	4.22065e-08	4.1875e-08	4.15548e-08	4.12453e-08	4.09459e-08	4.0656e-08	4.03751e-08	4.01029e-08	3.98387e-08	3.95823e-08	3.93333e-08	3.90913e-08	3.8856e-08	3.86271e-08	3.84043e-08	3.81874e-08	3.7976e-08	3.77699e-08	3.7569e-08	3.7373e-08	3.71817e-08	3.6995e-08	3.68125e-08	3.66343e-08	3.64601e-08	3.62898e-08	3.61232e-08	3.59601e-08	3.58006e-08	3.56444e-08	3.54915e-08	3.53416e-08	3.51948e-08	3.50509e-08	3.49098e-08	3.47714e-08	3.46357e-08	3.45025e-08	3.43718e-08	3.42435e-08	3.41176e-08	3.39939e-08	3.38724e-08
4.50745e-08	4.46391e-08	4.42214e-08	4.38202e-08	4.34346e-08	4.30635e-08	4.27059e-08	4.23612e-08	4.20285e-08	4.17071e-08	4.13965e-08	4.10959e-08	4.0805e-08	4.05231e-08	4.02499e-08	3.99848e-08	3.97274e-08	3.94775e-08	3.92346e-08	3.89985e-08	3.87687e-08	3.85451e-08	3.83274e-08	3.81152e-08	3.79084e-08	3.77068e-08	3.75101e-08	3.73181e-08	3.71306e-08	3.69475e-08	3.67687e-08	3.65938e-08	3.64229e-08	3.62556e-08	3.6092e-08	3.59319e-08	3.57752e-08	3.56217e-08	3.54713e-08	3.53239e-08	3.51795e-08	3.50379e-08	3.4899e-08	3.47628e-08	3.46291e-08	3.4498e-08	3.43692e-08	3.42428e-08	3.41186e-08	3.39967e-08
4.52463e-08	4.48092e-08	4.43899e-08	4.39873e-08	4.36002e-08	4.32276e-08	4.28687e-08	4.25227e-08	4.21887e-08	4.18661e-08	4.15543e-08	4.12526e-08	4.09606e-08	4.06776e-08	4.04033e-08	4.01372e-08	3.98789e-08	3.96281e-08	3.93843e-08	3.91472e-08	3.89166e-08	3.86921e-08	3.84736e-08	3.82606e-08	3.8053e-08	3.78506e-08	3.76531e-08	3.74604e-08	3.72723e-08	3.70885e-08	3.69089e-08	3.67334e-08	3.65618e-08	3.6394e-08	3.62298e-08	3.6069e-08	3.59117e-08	3.57576e-08	3.56066e-08	3.54587e-08	3.53137e-08	3.51716e-08	3.50322e-08	3.48955e-08	3.47613e-08	3.46296e-08	3.45004e-08	3.43735e-08	3.42489e-08	3.41265e-08
4.5426e-08	4.49872e-08	4.45662e-08	4.4162e-08	4.37733e-08	4.33993e-08	4.3039e-08	4.26916e-08	4.23563e-08	4.20324e-08	4.17194e-08	4.14165e-08	4.11233e-08	4.08392e-08	4.05638e-08	4.02967e-08	4.00374e-08	3.97855e-08	3.95407e-08	3.93027e-08	3.90712e-08	3.88459e-08	3.86264e-08	3.84126e-08	3.82042e-08	3.8001e-08	3.78028e-08	3.76093e-08	3.74204e-08	3.72359e-08	3.70556e-08	3.68794e-08	3.67071e-08	3.65386e-08	3.63738e-08	3.62124e-08	3.60544e-08	3.58997e-08	3.57482e-08	3.55997e-08	3.54541e-08	3.53114e-08	3.51715e-08	3.50342e-08	3.48995e-08	3.47673e-08	3.46376e-08	3.45102e-08	3.43851e-08	3.42622e-08
4.5614e-08	4.51733e-08	4.47506e-08	4.43447e-08	4.39545e-08	4.35789e-08	4.32171e-08	4.28683e-08	4.25316e-08	4.22064e-08	4.1892e-08	4.15879e-08	4.12935e-08	4.10083e-08	4.07317e-08	4.04635e-08	4.02031e-08	3.99502e-08	3.97044e-08	3.94655e-08	3.9233e-08	3.90067e-08	3.87863e-08	3.85717e-08	3.83624e-08	3.81584e-08	3.79593e-08	3.7765e-08	3.75753e-08	3.73901e-08	3.72091e-08	3.70322e-08	3.68592e-08	3.669e-08	3.65244e-08	3.63624e-08	3.62038e-08	3.60484e-08	3.58963e-08	3.57472e-08	3.5601e-08	3.54577e-08	3.53172e-08	3.51794e-08	3.50441e-08	3.49114e-08	3.47811e-08	3.46532e-08	3.45276e-08	3.44042e-08
4.58108e-08	4.53683e-08	4.49438e-08	4.45361e-08	4.41442e-08	4.3767e-08	4.34036e-08	4.30533e-08	4.27152e-08	4.23886e-08	4.20729e-08	4.17674e-08	4.14717e-08	4.11853e-08	4.09076e-08	4.06382e-08	4.03767e-08	4.01227e-08	3.98758e-08	3.96359e-08	3.94024e-08	3.91751e-08	3.89538e-08	3.87382e-08	3.85281e-08	3.83231e-08	3.81232e-08	3.79281e-08	3.77376e-08	3.75516e-08	3.73698e-08	3.71921e-08	3.70184e-08	3.68485e-08	3.66822e-08	3.65195e-08	3.63602e-08	3.62042e-08	3.60514e-08	3.59016e-08	3.57548e-08	3.56109e-08	3.54698e-08	3.53314e-08	3.51956e-08	3.50623e-08	3.49314e-08	3.4803e-08	3.46768e-08	3.45529e-08
4.60173e-08	4.55728e-08	4.51464e-08	4.47369e-08	4.43432e-08	4.39643e-08	4.35993e-08	4.32474e-08	4.29078e-08	4.25797e-08	4.22626e-08	4.19558e-08	4.16588e-08	4.1371e-08	4.1092e-08	4.08214e-08	4.05587e-08	4.03036e-08	4.00557e-08	3.98146e-08	3.95801e-08	3.93518e-08	3.91295e-08	3.89129e-08	3.87019e-08	3.8496e-08	3.82952e-08	3.80992e-08	3.79079e-08	3.7721e-08	3.75384e-08	3.73599e-08	3.71854e-08	3.70147e-08	3.68477e-08	3.66843e-08	3.65243e-08	3.63676e-08	3.6214e-08	3.60636e-08	3.59162e-08	3.57717e-08	3.56299e-08	3.54909e-08	3.53544e-08	3.52206e-08	3.50891e-08	3.49601e-08	3.48334e-08	3.47089e-08
4.6235e-08	4.57884e-08	4.536e-08	4.49485e-08	4.4553e-08	4.41723e-08	4.38056e-08	4.3452e-08	4.31108e-08	4.27812e-08	4.24626e-08	4.21543e-08	4.18559e-08	4.15668e-08	4.12865e-08	4.10146e-08	4.07507e-08	4.04944e-08	4.02453e-08	4.00031e-08	3.97674e-08	3.95381e-08	3.93147e-08	3.90971e-08	3.88851e-08	3.86782e-08	3.84765e-08	3.82796e-08	3.80873e-08	3.78996e-08	3.77161e-08	3.75368e-08	3.73615e-08	3.719e-08	3.70222e-08	3.6858e-08	3.66972e-08	3.65398e-08	3.63856e-08	3.62344e-08	3.60863e-08	3.59411e-08	3.57987e-08	3.5659e-08	3.55219e-08	3.53874e-08	3.52554e-08	3.51257e-08	3.49984e-08	3.48733e-08
4.64668e-08	4.60179e-08	4.55874e-08	4.51739e-08	4.47764e-08	4.43938e-08	4.40253e-08	4.36699e-08	4.33269e-08	4.29957e-08	4.26755e-08	4.23657e-08	4.20658e-08	4.17752e-08	4.14936e-08	4.12203e-08	4.09551e-08	4.06975e-08	4.04471e-08	4.02037e-08	3.99669e-08	3.97364e-08	3.95119e-08	3.92933e-08	3.90801e-08	3.88723e-08	3.86695e-08	3.84716e-08	3.82784e-08	3.80897e-08	3.79053e-08	3.77251e-08	3.75489e-08	3.73766e-08	3.7208e-08	3.7043e-08	3.68814e-08	3.67232e-08	3.65682e-08	3.64163e-08	3.62674e-08	3.61215e-08	3.59784e-08	3.5838e-08	3.57002e-08	3.55651e-08	3.54324e-08	3.53021e-08	3.51741e-08	3.50484e-08
4.67178e-08	4.62666e-08	4.58337e-08	4.5418e-08	4.50183e-08	4.46337e-08	4.42632e-08	4.39059e-08	4.35611e-08	4.32281e-08	4.29061e-08	4.25947e-08	4.22931e-08	4.2001e-08	4.17178e-08	4.14431e-08	4.11764e-08	4.09175e-08	4.06658e-08	4.0421e-08	4.0183e-08	3.99512e-08	3.97256e-08	3.95057e-08	3.92914e-08	3.90824e-08	3.88786e-08	3.86796e-08	3.84854e-08	3.82957e-08	3.81103e-08	3.79292e-08	3.7752e-08	3.75787e-08	3.74092e-08	3.72433e-08	3.70809e-08	3.69218e-08	3.6766e-08	3.66133e-08	3.64636e-08	3.63169e-08	3.6173e-08	3.60319e-08	3.58934e-08	3.57575e-08	3.56241e-08	3.54931e-08	3.53645e-08	3.52381e-08
4.6997e-08	4.6543e-08	4.61076e-08	4.56894e-08	4.52874e-08	4.49004e-08	4.45277e-08	4.41683e-08	4.38215e-08	4.34864e-08	4.31626e-08	4.28493e-08	4.25459e-08	4.22521e-08	4.19672e-08	4.16909e-08	4.14226e-08	4.11621e-08	4.09089e-08	4.06627e-08	4.04232e-08	4.01901e-08	3.99631e-08	3.97419e-08	3.95264e-08	3.93161e-08	3.91111e-08	3.8911e-08	3.87156e-08	3.85247e-08	3.83383e-08	3.8156e-08	3.79778e-08	3.78035e-08	3.7633e-08	3.74661e-08	3.73027e-08	3.71427e-08	3.69859e-08	3.68323e-08	3.66818e-08	3.65342e-08	3.63894e-08	3.62475e-08	3.61082e-08	3.59715e-08	3.58373e-08	3.57055e-08	3.55761e-08	3.5449e-08
4.73196e-08	4.68625e-08	4.64241e-08	4.6003e-08	4.55982e-08	4.52087e-08	4.48334e-08	4.44715e-08	4.41223e-08	4.3785e-08	4.34589e-08	4.31434e-08	4.2838e-08	4.25422e-08	4.22554e-08	4.19771e-08	4.1707e-08	4.14447e-08	4.11898e-08	4.09419e-08	4.07008e-08	4.04661e-08	4.02375e-08	4.00149e-08	3.97978e-08	3.95862e-08	3.93797e-08	3.91782e-08	3.89815e-08	3.87893e-08	3.86016e-08	3.84181e-08	3.82387e-08	3.80632e-08	3.78915e-08	3.77235e-08	3.7559e-08	3.73979e-08	3.72401e-08	3.70854e-08	3.69338e-08	3.67852e-08	3.66395e-08	3.64966e-08	3.63563e-08	3.62187e-08	3.60836e-08	3.59509e-08	3.58206e-08	3.56927e-08
4.77134e-08	4.72525e-08	4.68105e-08	4.63859e-08	4.59778e-08	4.5585e-08	4.52066e-08	4.48417e-08	4.44896e-08	4.41495e-08	4.38207e-08	4.35026e-08	4.31947e-08	4.28964e-08	4.26072e-08	4.23266e-08	4.20543e-08	4.17898e-08	4.15328e-08	4.12828e-08	4.10397e-08	4.08031e-08	4.05726e-08	4.03481e-08	4.01293e-08	3.99159e-08	3.97077e-08	3.95045e-08	3.93062e-08	3.91124e-08	3.89231e-08	3.87381e-08	3.85572e-08	3.83803e-08	3.82072e-08	3.80378e-08	3.78719e-08	3.77095e-08	3.75503e-08	3.73944e-08	3.72416e-08	3.70918e-08	3.69448e-08	3.68007e-08	3.66593e-08	3.65205e-08	3.63843e-08	3.62506e-08	3.61192e-08	3.59902e-08
4.82253e-08	4.77595e-08	4.73127e-08	4.68836e-08	4.64711e-08	4.60741e-08	4.56916e-08	4.53228e-08	4.4967e-08	4.46232e-08	4.42909e-08	4.39694e-08	4.36582e-08	4.33567e-08	4.30644e-08	4.27809e-08	4.25056e-08	4.22383e-08	4.19785e-08	4.17259e-08	4.14802e-08	4.1241e-08	4.10081e-08	4.07812e-08	4.056e-08	4.03444e-08	4.0134e-08	3.99286e-08	3.97282e-08	3.95324e-08	3.9341e-08	3.91541e-08	3.89712e-08	3.87924e-08	3.86175e-08	3.84462e-08	3.82786e-08	3.81144e-08	3.79536e-08	3.7796e-08	3.76416e-08	3.74902e-08	3.73417e-08	3.7196e-08	3.70531e-08	3.69129e-08	3.67752e-08	3.664e-08	3.65073e-08	3.63769e-08
[truncated: 250 more columns]

## Sheet: Tabelle5
Raw data Figure 7d: gold nanorod concentration data
0	0	0	0	0	0	0	0	0	0	0	0	0	0	0	0	0	0	0	0	0	0	0	0	0	0	0	0	0	0	0	0	0	0	0	0	0	0	0	0	0	0	0	0	0	0	0	0	0	2401980000000
0	0	0	0	0	0	0	0	0	0	0	0	0	0	0	0	0	0	0	0	0	0	0	0	0	0	0	0	0	0	0	0	0	0	0	0	0	0	0	0	0	0	0	0	0	0	0	0	0	0
0	0	0	0	0	0	0	0	0	0	0	0	0	0	0	0	0	0	0	0	0	0	0	0	0	0	0	0	0	0	0	0	0	0	0	0	0	0	0	0	0	0	0	0	0	0	0	0	0	0
0	0	0	0	0	0	0	0	0	0	0	0	0	0	0	0	0	0	0	0	0	0	0	0	0	0	0	0	0	0	0	0	0	0	0	0	0	0	0	0	0	0	0	0	0	0	0	0	0	0
0	0	0	0	0	0	0	0	0	0	0	0	0	0	0	0	0	0	0	0	0	0	0	0	0	0	0	0	0	0	0	0	0	0	0	0	0	0	0	0	0	0	0	0	0	0	0	0	0	0
0	0	0	0	0	0	0	0	0	0	0	0	0	0	0	0	0	0	0	0	0	0	0	0	0	0	0	0	0	0	0	0	0	0	0	0	0	0	0	0	0	0	0	0	0	0	0	0	0	0
0	0	0	0	0	0	0	0	0	0	0	0	0	0	0	0	0	0	0	0	0	0	0	0	0	0	0	0	0	0	0	0	0	0	0	0	0	0	0	0	0	0	0	0	0	0	0	0	0	0
0	0	0	0	0	0	0	0	0	0	0	0	0	0	0	0	0	0	0	0	0	0	0	0	0	0	0	0	0	0	0	0	0	0	0	0	0	0	0	0	0	0	0	0	0	0	0	0	0	0
0	0	0	0	0	0	0	0	0	0	0	0	0	0	0	0	0	0	0	0	0	0	0	0	0	0	0	0	0	0	0	0	0	0	0	0	0	0	0	0	0	0	0	0	0	0	0	0	0	0
0	0	0	0	0	0	0	0	0	0	0	0	0	0	0	0	0	0	0	0	0	0	0	0	0	0	0	0	0	0	0	0	0	0	0	0	0	0	0	0	0	0	0	0	0	0	0	0	0	0
0	0	0	0	0	0	0	0	0	0	0	0	0	0	0	0	0	0	0	0	0	0	0	0	0	0	0	0	0	0	0	0	0	0	0	0	0	0	0	0	0	0	0	0	0	0	0	0	0	0
0	0	0	0	0	0	0	0	0	0	0	0	0	0	0	0	0	0	0	0	0	0	0	0	0	0	0	0	0	0	0	0	0	0	0	0	0	0	0	0	0	0	0	0	0	0	0	0	0	0
0	0	0	0	0	0	0	0	0	0	0	0	0	0	0	0	0	0	0	0	0	0	0	0	0	0	0	0	0	0	0	0	0	0	0	0	0	0	0	0	0	0	0	0	0	0	0	0	0	0
0	0	0	0	0	0	0	0	0	0	0	0	0	0	0	0	0	0	0	0	0	0	0	0	0	0	0	0	0	0	0	0	0	0	0	0	0	0	0	0	0	0	0	0	0	0	0	0	0	0
0	0	0	0	0	0	0	0	0	0	0	0	0	0	0	0	0	0	0	0	0	0	0	0	0	0	0	0	0	0	0	0	0	0	0	0	0	0	0	0	0	0	0	0	0	0	0	0	0	0
0	0	0	0	0	0	0	0	0	0	0	0	0	0	0	0	0	0	0	0	0	0	0	0	0	0	0	0	0	0	0	0	0	0	0	0	0	0	0	0	0	0	0	0	0	0	0	0	0	0
0	0	0	0	0	0	0	0	0	0	0	0	0	0	0	0	0	0	0	0	0	0	0	0	0	0	0	0	0	0	0	0	0	0	0	0	0	0	0	0	0	0	0	0	0	0	0	0	0	0
0	0	0	0	0	0	0	0	0	0	0	0	0	0	0	0	0	0	0	0	0	0	0	0	0	0	0	0	0	0	0	0	0	0	0	0	0	0	0	0	0	0	0	0	0	0	0	0	0	0
0	0	0	0	0	0	0	0	0	0	0	0	0	0	0	0	0	0	0	0	0	0	0	0	0	0	0	0	0	0	0	0	0	0	0	0	0	0	0	0	0	0	0	0	0	0	0	0	0	0
0	0	0	0	0	0	0	0	0	0	0	0	0	0	0	0	0	0	0	0	0	0	0	0	0	0	0	0	0	0	0	0	0	0	0	0	0	0	0	0	0	0	0	0	0	0	0	0	0	0
0	0	0	0	0	0	0	0	0	0	0	0	0	0	0	0	0	0	0	0	0	0	0	0	0	0	0	0	0	0	0	0	0	0	0	0	0	0	0	0	0	0	0	0	0	0	0	0	0	0
0	0	0	0	0	0	0	0	0	0	0	0	0	0	0	0	0	0	0	0	0	0	0	0	0	0	0	0	0	0	0	0	0	0	0	0	0	0	0	0	0	0	0	0	0	0	0	0	0	0
0	0	0	0	0	0	0	0	0	0	0	0	0	0	0	0	0	0	0	0	0	0	0	0	0	0	0	0	0	0	0	0	0	0	0	0	0	0	0	0	0	0	0	0	0	0	0	0	0	0
0	0	0	0	0	0	0	0	0	0	0	0	0	0	0	0	0	0	0	0	0	0	0	0	0	0	0	0	0	0	0	0	0	0	0	0	0	0	0	0	0	0	0	0	0	0	0	0	0	0
0	0	0	0	0	0	0	0	0	0	0	0	0	0	0	0	0	0	0	0	0	0	0	0	0	0	0	0	0	0	0	0	0	0	0	0	0	0	0	0	0	0	0	0	0	0	0	0	0	0
0	0	0	0	0	0	0	0	0	0	0	0	0	0	0	0	0	0	0	0	0	0	0	0	0	0	0	0	0	0	0	0	0	0	0	0	0	0	0	0	0	0	0	0	0	0	0	0	0	0
0	0	0	0	0	0	0	0	0	0	0	0	0	0	0	0	0	0	0	0	0	0	0	0	0	0	0	0	0	0	0	0	0	0	0	0	0	0	0	0	0	0	0	0	0	0	0	0	0	0
0	0	0	0	0	0	0	0	0	0	0	0	0	0	0	0	0	0	0	0	0	0	0	0	0	0	0	0	0	0	0	0	0	0	0	0	0	0	0	0	0	0	0	0	0	0	0	0	0	0
0	0	0	0	0	0	0	0	0	0	0	0	0	0	0	0	0	0	0	0	0	0	0	0	0	0	0	0	0	0	0	0	0	0	0	0	0	0	0	0	0	0	0	0	0	0	0	0	0	0
0	0	0	0	0	0	0	0	0	0	0	0	0	0	0	0	0	0	0	0	0	0	0	0	0	0	0	0	0	0	0	0	0	0	0	0	0	0	0	0	0	0	0	0	0	0	0	0	0	0
0	0	0	0	0	0	0	0	0	0	0	0	0	0	0	0	0	0	0	0	0	0	0	0	0	0	0	0	0	0	0	0	0	0	0	0	0	0	0	0	0	0	0	0	0	0	0	0	0	0
0	0	0	0	0	0	0	0	0	0	0	0	0	0	0	0	0	0	0	0	0	0	0	0	0	0	0	0	0	0	0	0	0	0	0	0	0	0	0	0	0	0	0	0	0	0	0	0	0	0
0	0	0	0	0	0	0	0	0	0	0	0	0	0	0	0	0	0	0	0	0	0	0	0	0	0	0	0	0	0	0	0	0	0	0	0	0	0	0	0	0	0	0	0	0	0	0	0	0	0
0	0	0	0	0	0	0	0	0	0	0	0	0	0	0	0	0	0	0	0	0	0	0	0	0	0	0	0	0	0	0	0	0	0	0	0	0	0	0	0	0	0	0	0	0	0	0	0	0	0
0	0	0	0	0	0	0	0	0	0	0	0	0	0	0	0	0	0	0	0	0	0	0	0	0	0	0	0	0	0	0	0	0	0	0	0	0	0	0	0	0	0	0	0	0	0	0	0	0	0
0	0	0	0	0	0	0	0	0	0	0	0	0	0	0	0	0	0	0	0	0	0	0	0	0	0	0	0	0	0	0	0	0	0	0	0	0	0	0	0	0	0	0	0	0	0	0	0	0	0
0	0	0	0	0	0	0	0	0	0	0	0	0	0	0	0	0	0	0	0	0	0	0	0	0	0	0	0	0	0	0	0	0	0	0	0	0	0	0	0	0	0	0	0	0	0	0	0	0	0
0	0	0	0	0	0	0	0	0	0	0	0	0	0	0	0	0	0	0	0	0	0	0	0	0	0	0	0	0	0	0	0	0	0	0	0	0	0	0	0	0	0	0	0	0	0	0	0	0	0
0	0	0	0	0	0	0	0	0	0	0	0	0	0	0	0	0	0	0	0	0	0	0	0	0	0	0	0	0	0	0	0	0	0	0	0	0	0	0	0	0	0	0	0	0	0	0	0	0	0
0	0	0	0	0	0	0	0	0	0	0	0	0	0	0	0	0	0	0	0	0	0	0	0	0	0	0	0	0	0	0	0	0	0	0	0	0	0	0	0	0	0	0	0	0	0	0	0	0	0
0	0	0	0	0	0	0	0	0	0	0	0	0	0	0	0	0	0	0	0	0	0	0	0	0	0	0	0	0	0	0	0	0	0	0	0	0	0	0	0	0	0	0	0	0	0	0	0	0	0
0	0	0	0	0	0	0	0	0	0	0	0	0	0	0	0	0	0	0	0	0	0	0	0	0	0	0	0	0	0	0	0	0	0	0	0	0	0	0	0	0	0	0	0	0	0	0	0	0	0
0	0	0	0	0	0	0	0	0	0	0	0	0	0	0	0	0	0	0	0	0	0	0	0	0	0	0	0	0	0	0	0	0	0	0	0	0	0	0	0	0	0	0	0	0	0	0	0	0	0
0	0	0	0	0	0	0	0	0	0	0	0	0	0	0	0	0	0	0	0	0	0	0	0	0	0	0	0	0	0	0	0	0	0	0	0	0	0	0	0	0	0	0	0	0	0	0	0	0	0
0	0	0	0	0	0	0	0	0	0	0	0	0	0	0	0	0	0	0	0	0	0	0	0	0	0	0	0	0	0	0	0	0	0	0	0	0	0	0	0	0	0	0	0	0	0	0	0	0	0
0	0	0	0	0	0	0	0	0	0	0	0	0	0	0	0	0	0	0	0	0	0	0	0	0	0	0	0	0	0	0	0	0	0	0	0	0	0	0	0	0	0	0	0	0	0	0	0	0	0
0	0	0	0	0	0	0	0	0	0	0	0	0	0	0	0	0	0	0	0	0	0	0	0	0	0	0	0	0	0	0	0	0	0	0	0	0	0	0	0	0	0	0	0	0	0	0	0	0	0
0	0	0	0	0	0	0	0	0	0	0	0	0	0	0	0	0	0	0	0	0	0	0	0	0	0	0	0	0	0	0	0	0	0	0	0	0	0	0	0	0	0	0	0	0	0	0	0	0	0
0	0	0	0	0	0	0	0	0	0	0	0	0	0	0	0	0	0	0	0	0	0	0	0	0	0	0	0	0	0	0	0	0	0	0	0	0	0	0	0	0	0	0	0	0	0	0	0	0	0
0	0	0	0	0	0	0	0	0	0	0	0	0	0	0	0	0	0	0	0	0	0	0	0	0	0	0	0	0	0	0	0	0	0	0	0	0	0	0	0	0	0	0	0	0	0	0	0	0	0
[truncated: 250 more columns]

## Sheet: Tabelle6
Raw data Figure 7d: gold nanorod length data
3.93345e-08	3.97351e-08	4.01366e-08	4.05388e-08	4.09416e-08	4.13448e-08	4.17483e-08	4.21521e-08	4.2556e-08	4.29599e-08	4.33638e-08	4.37676e-08	4.41712e-08	4.45746e-08	4.49778e-08	4.53808e-08	4.57834e-08	4.61856e-08	4.65875e-08	4.69889e-08	4.739e-08	4.77905e-08	4.81906e-08	4.85903e-08	4.89894e-08	4.9388e-08	4.97862e-08	5.01837e-08	5.05808e-08	5.09773e-08	5.13733e-08	5.17687e-08	5.21636e-08	5.25579e-08	5.29516e-08	5.33448e-08	5.37374e-08	5.41295e-08	5.4521e-08	5.49119e-08	5.53023e-08	5.56921e-08	5.60813e-08	5.647e-08	5.68581e-08	5.72457e-08	5.76327e-08	5.80192e-08	5.84051e-08	5.87905e-08
3.96639e-08	4.00679e-08	4.04727e-08	4.08783e-08	4.12845e-08	4.16911e-08	4.2098e-08	4.25052e-08	4.29124e-08	4.33197e-08	4.3727e-08	4.41342e-08	4.45413e-08	4.49481e-08	4.53547e-08	4.5761e-08	4.6167e-08	4.65726e-08	4.69778e-08	4.73827e-08	4.77871e-08	4.8191e-08	4.85945e-08	4.89975e-08	4.94e-08	4.9802e-08	5.02035e-08	5.06044e-08	5.10048e-08	5.14046e-08	5.1804e-08	5.22027e-08	5.26009e-08	5.29985e-08	5.33956e-08	5.37921e-08	5.4188e-08	5.45834e-08	5.49782e-08	5.53724e-08	5.57661e-08	5.61592e-08	5.65517e-08	5.69437e-08	5.73351e-08	5.77259e-08	5.81162e-08	5.85059e-08	5.88951e-08	5.92837e-08
3.98886e-08	4.02948e-08	4.0702e-08	4.11099e-08	4.15184e-08	4.19273e-08	4.23365e-08	4.2746e-08	4.31556e-08	4.35652e-08	4.39748e-08	4.43843e-08	4.47937e-08	4.52028e-08	4.56117e-08	4.60203e-08	4.64286e-08	4.68366e-08	4.72441e-08	4.76513e-08	4.8058e-08	4.84642e-08	4.887e-08	4.92753e-08	4.96801e-08	5.00843e-08	5.04881e-08	5.08913e-08	5.1294e-08	5.16961e-08	5.20977e-08	5.24987e-08	5.28992e-08	5.32991e-08	5.36984e-08	5.40972e-08	5.44954e-08	5.4893e-08	5.52901e-08	5.56865e-08	5.60824e-08	5.64778e-08	5.68726e-08	5.72668e-08	5.76604e-08	5.80535e-08	5.8446e-08	5.8838e-08	5.92294e-08	5.96202e-08
4.00736e-08	4.04817e-08	4.08908e-08	4.13006e-08	4.1711e-08	4.21218e-08	4.25329e-08	4.29443e-08	4.33558e-08	4.37673e-08	4.41788e-08	4.45902e-08	4.50015e-08	4.54125e-08	4.58234e-08	4.62339e-08	4.66441e-08	4.70539e-08	4.74633e-08	4.78724e-08	4.8281e-08	4.86891e-08	4.90968e-08	4.9504e-08	4.99106e-08	5.03168e-08	5.07224e-08	5.11275e-08	5.15321e-08	5.19361e-08	5.23396e-08	5.27425e-08	5.31448e-08	5.35466e-08	5.39478e-08	5.43484e-08	5.47484e-08	5.51479e-08	5.55468e-08	5.59452e-08	5.63429e-08	5.67401e-08	5.71367e-08	5.75328e-08	5.79282e-08	5.83232e-08	5.87175e-08	5.91113e-08	5.95045e-08	5.98972e-08
4.02379e-08	4.06477e-08	4.10585e-08	4.14699e-08	4.1882e-08	4.22945e-08	4.27073e-08	4.31204e-08	4.35336e-08	4.39468e-08	4.436e-08	4.47731e-08	4.51861e-08	4.55988e-08	4.60113e-08	4.64235e-08	4.68354e-08	4.72469e-08	4.76581e-08	4.80688e-08	4.84791e-08	4.88889e-08	4.92982e-08	4.97071e-08	5.01154e-08	5.05233e-08	5.09306e-08	5.13374e-08	5.17436e-08	5.21493e-08	5.25544e-08	5.29589e-08	5.33629e-08	5.37664e-08	5.41692e-08	5.45715e-08	5.49732e-08	5.53743e-08	5.57749e-08	5.61749e-08	5.65743e-08	5.69731e-08	5.73713e-08	5.7769e-08	5.81661e-08	5.85627e-08	5.89587e-08	5.93541e-08	5.9749e-08	6.01433e-08
4.03897e-08	4.08011e-08	4.12134e-08	4.16265e-08	4.20401e-08	4.24541e-08	4.28685e-08	4.32832e-08	4.36979e-08	4.41127e-08	4.45275e-08	4.49421e-08	4.53566e-08	4.5771e-08	4.6185e-08	4.65988e-08	4.70122e-08	4.74253e-08	4.7838e-08	4.82503e-08	4.86621e-08	4.90735e-08	4.94844e-08	4.98948e-08	5.03047e-08	5.07141e-08	5.1123e-08	5.15313e-08	5.1939e-08	5.23463e-08	5.27529e-08	5.3159e-08	5.35645e-08	5.39695e-08	5.43739e-08	5.47777e-08	5.51809e-08	5.55836e-08	5.59856e-08	5.63871e-08	5.67881e-08	5.71884e-08	5.75882e-08	5.79874e-08	5.8386e-08	5.87841e-08	5.91816e-08	5.95785e-08	5.99748e-08	6.03706e-08
4.05341e-08	4.0947e-08	4.13608e-08	4.17753e-08	4.21904e-08	4.2606e-08	4.30218e-08	4.34379e-08	4.38542e-08	4.42705e-08	4.46867e-08	4.51029e-08	4.55189e-08	4.59347e-08	4.63502e-08	4.67655e-08	4.71804e-08	4.7595e-08	4.80091e-08	4.84229e-08	4.88362e-08	4.92491e-08	4.96614e-08	5.00733e-08	5.04847e-08	5.08956e-08	5.13059e-08	5.17157e-08	5.21249e-08	5.25336e-08	5.29417e-08	5.33493e-08	5.37562e-08	5.41627e-08	5.45685e-08	5.49738e-08	5.53784e-08	5.57825e-08	5.61861e-08	5.6589e-08	5.69914e-08	5.73932e-08	5.77944e-08	5.8195e-08	5.85951e-08	5.89946e-08	5.93935e-08	5.97919e-08	6.01896e-08	6.05869e-08
4.06743e-08	4.10886e-08	4.15038e-08	4.19198e-08	4.23363e-08	4.27533e-08	4.31706e-08	4.35882e-08	4.40058e-08	4.44236e-08	4.48413e-08	4.52589e-08	4.56763e-08	4.60936e-08	4.65105e-08	4.69272e-08	4.73436e-08	4.77596e-08	4.81752e-08	4.85904e-08	4.90052e-08	4.94195e-08	4.98333e-08	5.02466e-08	5.06594e-08	5.10717e-08	5.14834e-08	5.18946e-08	5.23053e-08	5.27154e-08	5.31249e-08	5.35339e-08	5.39423e-08	5.43501e-08	5.47574e-08	5.51641e-08	5.55702e-08	5.59757e-08	5.63806e-08	5.67849e-08	5.71887e-08	5.75919e-08	5.79945e-08	5.83965e-08	5.8798e-08	5.91989e-08	5.95992e-08	5.9999e-08	6.03981e-08	6.07968e-08
4.08126e-08	4.12283e-08	4.16449e-08	4.20623e-08	4.24803e-08	4.28987e-08	4.33175e-08	4.37364e-08	4.41555e-08	4.45747e-08	4.49938e-08	4.54128e-08	4.58317e-08	4.62504e-08	4.66688e-08	4.70869e-08	4.75047e-08	4.79221e-08	4.83391e-08	4.87558e-08	4.91719e-08	4.95876e-08	5.00029e-08	5.04176e-08	5.08318e-08	5.12455e-08	5.16587e-08	5.20713e-08	5.24833e-08	5.28948e-08	5.33058e-08	5.37162e-08	5.4126e-08	5.45352e-08	5.49438e-08	5.53519e-08	5.57594e-08	5.61663e-08	5.65726e-08	5.69783e-08	5.73835e-08	5.7788e-08	5.8192e-08	5.85954e-08	5.89983e-08	5.94005e-08	5.98022e-08	6.02033e-08	6.06039e-08	6.10039e-08
4.09509e-08	4.13681e-08	4.17861e-08	4.22049e-08	4.26243e-08	4.30441e-08	4.34643e-08	4.38847e-08	4.43052e-08	4.47258e-08	4.51464e-08	4.55668e-08	4.59871e-08	4.64072e-08	4.6827e-08	4.72466e-08	4.76658e-08	4.80846e-08	4.85031e-08	4.89211e-08	4.93387e-08	4.97558e-08	5.01725e-08	5.05886e-08	5.10042e-08	5.14193e-08	5.18339e-08	5.22479e-08	5.26614e-08	5.30743e-08	5.34867e-08	5.38984e-08	5.43096e-08	5.47202e-08	5.51303e-08	5.55397e-08	5.59486e-08	5.63569e-08	5.67646e-08	5.71717e-08	5.75783e-08	5.79842e-08	5.83896e-08	5.87944e-08	5.91986e-08	5.96022e-08	6.00053e-08	6.04078e-08	6.08097e-08	6.1211e-08
4.10906e-08	4.15092e-08	4.19287e-08	4.23489e-08	4.27697e-08	4.3191e-08	4.36126e-08	4.40345e-08	4.44564e-08	4.48784e-08	4.53004e-08	4.57223e-08	4.61441e-08	4.65656e-08	4.69869e-08	4.74078e-08	4.78285e-08	4.82488e-08	4.86687e-08	4.90881e-08	4.95071e-08	4.99257e-08	5.03438e-08	5.07613e-08	5.11784e-08	5.15949e-08	5.20109e-08	5.24263e-08	5.28412e-08	5.32555e-08	5.36693e-08	5.40825e-08	5.44951e-08	5.49071e-08	5.53186e-08	5.57294e-08	5.61397e-08	5.65494e-08	5.69585e-08	5.7367e-08	5.7775e-08	5.81823e-08	5.85891e-08	5.89953e-08	5.94009e-08	5.98059e-08	6.02103e-08	6.06142e-08	6.10175e-08	6.14202e-08
4.12328e-08	4.16528e-08	4.20738e-08	4.24954e-08	4.29177e-08	4.33405e-08	4.37635e-08	4.41868e-08	4.46103e-08	4.50337e-08	4.54572e-08	4.58806e-08	4.63038e-08	4.67268e-08	4.71495e-08	4.75719e-08	4.7994e-08	4.84158e-08	4.88371e-08	4.9258e-08	4.96785e-08	5.00985e-08	5.0518e-08	5.09371e-08	5.13556e-08	5.17735e-08	5.2191e-08	5.26079e-08	5.30242e-08	5.344e-08	5.38552e-08	5.42698e-08	5.46838e-08	5.50973e-08	5.55102e-08	5.59225e-08	5.63342e-08	5.67453e-08	5.71558e-08	5.75658e-08	5.79751e-08	5.83839e-08	5.87921e-08	5.91997e-08	5.96067e-08	6.00131e-08	6.0419e-08	6.08243e-08	6.1229e-08	6.16331e-08
4.13782e-08	4.17997e-08	4.22221e-08	4.26453e-08	4.30691e-08	4.34933e-08	4.39179e-08	4.43427e-08	4.47676e-08	4.51926e-08	4.56175e-08	4.60424e-08	4.64671e-08	4.68916e-08	4.73158e-08	4.77397e-08	4.81633e-08	4.85866e-08	4.90094e-08	4.94318e-08	4.98538e-08	5.02753e-08	5.06963e-08	5.11168e-08	5.15368e-08	5.19562e-08	5.23751e-08	5.27935e-08	5.32113e-08	5.36286e-08	5.40452e-08	5.44613e-08	5.48768e-08	5.52918e-08	5.57061e-08	5.61199e-08	5.6533e-08	5.69456e-08	5.73576e-08	5.7769e-08	5.81798e-08	5.859e-08	5.89997e-08	5.94087e-08	5.98172e-08	6.0225e-08	6.06324e-08	6.10391e-08	6.14452e-08	6.18508e-08
4.15272e-08	4.19502e-08	4.23742e-08	4.27989e-08	4.32242e-08	4.365e-08	4.40761e-08	4.45024e-08	4.49289e-08	4.53554e-08	4.57819e-08	4.62083e-08	4.66345e-08	4.70605e-08	4.74863e-08	4.79118e-08	4.83369e-08	4.87617e-08	4.9186e-08	4.961e-08	5.00335e-08	5.04565e-08	5.0879e-08	5.1301e-08	5.17225e-08	5.21435e-08	5.25639e-08	5.29838e-08	5.34031e-08	5.38219e-08	5.42401e-08	5.46577e-08	5.50747e-08	5.54911e-08	5.5907e-08	5.63222e-08	5.67369e-08	5.7151e-08	5.75645e-08	5.79774e-08	5.83897e-08	5.88014e-08	5.92125e-08	5.9623e-08	6.0033e-08	6.04423e-08	6.08511e-08	6.12593e-08	6.16669e-08	6.2074e-08
4.16801e-08	4.21047e-08	4.25302e-08	4.29565e-08	4.33833e-08	4.38107e-08	4.42383e-08	4.46662e-08	4.50943e-08	4.55224e-08	4.59504e-08	4.63784e-08	4.68062e-08	4.72338e-08	4.76612e-08	4.80882e-08	4.85149e-08	4.89412e-08	4.93672e-08	4.97927e-08	5.02177e-08	5.06423e-08	5.10664e-08	5.149e-08	5.19131e-08	5.23356e-08	5.27576e-08	5.3179e-08	5.35999e-08	5.40202e-08	5.44399e-08	5.48591e-08	5.52776e-08	5.56956e-08	5.6113e-08	5.65298e-08	5.6946e-08	5.73616e-08	5.77766e-08	5.8191e-08	5.86049e-08	5.90181e-08	5.94308e-08	5.98428e-08	6.02543e-08	6.06652e-08	6.10755e-08	6.14852e-08	6.18943e-08	6.23029e-08
4.18364e-08	4.22626e-08	4.26897e-08	4.31176e-08	4.35461e-08	4.3975e-08	4.44043e-08	4.48338e-08	4.52635e-08	4.56932e-08	4.61228e-08	4.65524e-08	4.69818e-08	4.74111e-08	4.784e-08	4.82687e-08	4.8697e-08	4.91249e-08	4.95524e-08	4.99796e-08	5.04062e-08	5.08324e-08	5.12581e-08	5.16833e-08	5.21079e-08	5.25321e-08	5.29556e-08	5.33787e-08	5.38011e-08	5.4223e-08	5.46443e-08	5.50651e-08	5.54852e-08	5.59048e-08	5.63237e-08	5.67421e-08	5.71599e-08	5.7577e-08	5.79936e-08	5.84096e-08	5.8825e-08	5.92398e-08	5.9654e-08	6.00676e-08	6.04806e-08	6.08931e-08	6.13049e-08	6.17162e-08	6.21269e-08	6.2537e-08
4.19956e-08	4.24234e-08	4.28522e-08	4.32817e-08	4.37118e-08	4.41424e-08	4.45733e-08	4.50045e-08	4.54358e-08	4.58671e-08	4.62984e-08	4.67296e-08	4.71607e-08	4.75915e-08	4.80221e-08	4.84524e-08	4.88824e-08	4.93119e-08	4.97411e-08	5.01698e-08	5.05981e-08	5.10259e-08	5.14533e-08	5.18801e-08	5.23064e-08	5.27321e-08	5.31573e-08	5.35819e-08	5.4006e-08	5.44295e-08	5.48525e-08	5.52748e-08	5.56965e-08	5.61177e-08	5.65383e-08	5.69582e-08	5.73776e-08	5.77964e-08	5.82146e-08	5.86322e-08	5.90491e-08	5.94655e-08	5.98813e-08	6.02965e-08	6.07111e-08	6.11251e-08	6.15386e-08	6.19514e-08	6.23637e-08	6.27754e-08
4.21566e-08	4.25861e-08	4.30165e-08	4.34477e-08	4.38794e-08	4.43117e-08	4.47443e-08	4.51771e-08	4.561e-08	4.6043e-08	4.6476e-08	4.69089e-08	4.73416e-08	4.77741e-08	4.82063e-08	4.86383e-08	4.90699e-08	4.95011e-08	4.99319e-08	5.03623e-08	5.07923e-08	5.12217e-08	5.16507e-08	5.20792e-08	5.25071e-08	5.29345e-08	5.33613e-08	5.37876e-08	5.42133e-08	5.46384e-08	5.5063e-08	5.5487e-08	5.59104e-08	5.63331e-08	5.67553e-08	5.71769e-08	5.75979e-08	5.80183e-08	5.84381e-08	5.88573e-08	5.92759e-08	5.96939e-08	6.01113e-08	6.05281e-08	6.09443e-08	6.13599e-08	6.17749e-08	6.21894e-08	6.26032e-08	6.30165e-08
4.23182e-08	4.27493e-08	4.31814e-08	4.36142e-08	4.40476e-08	4.44815e-08	4.49158e-08	4.53502e-08	4.57849e-08	4.62195e-08	4.66542e-08	4.70887e-08	4.75231e-08	4.79572e-08	4.83912e-08	4.88248e-08	4.9258e-08	4.96909e-08	5.01234e-08	5.05554e-08	5.0987e-08	5.14182e-08	5.18488e-08	5.22789e-08	5.27085e-08	5.31375e-08	5.3566e-08	5.39939e-08	5.44212e-08	5.4848e-08	5.52742e-08	5.56998e-08	5.61248e-08	5.65492e-08	5.69731e-08	5.73963e-08	5.78189e-08	5.82409e-08	5.86623e-08	5.90831e-08	5.95034e-08	5.9923e-08	6.0342e-08	6.07604e-08	6.11782e-08	6.15954e-08	6.20121e-08	6.24281e-08	6.28436e-08	6.32584e-08
4.2479e-08	4.29117e-08	4.33454e-08	4.37799e-08	4.4215e-08	4.46505e-08	4.50864e-08	4.55226e-08	4.59588e-08	4.63951e-08	4.68314e-08	4.72676e-08	4.77037e-08	4.81395e-08	4.85751e-08	4.90103e-08	4.94452e-08	4.98798e-08	5.03139e-08	5.07476e-08	5.11808e-08	5.16136e-08	5.20459e-08	5.24776e-08	5.29088e-08	5.33395e-08	5.37696e-08	5.41992e-08	5.46282e-08	5.50566e-08	5.54844e-08	5.59116e-08	5.63383e-08	5.67643e-08	5.71897e-08	5.76146e-08	5.80388e-08	5.84624e-08	5.88855e-08	5.93079e-08	5.97297e-08	6.01509e-08	6.05715e-08	6.09915e-08	6.1411e-08	6.18298e-08	6.2248e-08	6.26656e-08	6.30827e-08	6.34992e-08
4.26378e-08	4.30722e-08	4.35075e-08	4.39436e-08	4.43803e-08	4.48175e-08	4.5255e-08	4.56928e-08	4.61307e-08	4.65687e-08	4.70066e-08	4.74444e-08	4.78821e-08	4.83196e-08	4.87568e-08	4.91937e-08	4.96302e-08	5.00664e-08	5.05021e-08	5.09375e-08	5.13723e-08	5.18067e-08	5.22406e-08	5.2674e-08	5.31068e-08	5.35391e-08	5.39708e-08	5.4402e-08	5.48326e-08	5.52626e-08	5.56921e-08	5.61209e-08	5.65491e-08	5.69768e-08	5.74038e-08	5.78303e-08	5.82561e-08	5.86813e-08	5.91059e-08	5.95299e-08	5.99533e-08	6.03762e-08	6.07983e-08	6.12199e-08	6.16409e-08	6.20613e-08	6.24811e-08	6.29004e-08	6.3319e-08	6.3737e-08
4.27938e-08	4.32297e-08	4.36667e-08	4.41044e-08	4.45427e-08	4.49815e-08	4.54206e-08	4.586e-08	4.62995e-08	4.67391e-08	4.71786e-08	4.76181e-08	4.80573e-08	4.84964e-08	4.89352e-08	4.93737e-08	4.98119e-08	5.02496e-08	5.0687e-08	5.11239e-08	5.15604e-08	5.19964e-08	5.24318e-08	5.28668e-08	5.33012e-08	5.37351e-08	5.41684e-08	5.46012e-08	5.50334e-08	5.5465e-08	5.5896e-08	5.63264e-08	5.67562e-08	5.71854e-08	5.7614e-08	5.8042e-08	5.84694e-08	5.88962e-08	5.93224e-08	5.9748e-08	6.0173e-08	6.05973e-08	6.10211e-08	6.14442e-08	6.18668e-08	6.22887e-08	6.27101e-08	6.31308e-08	6.3551e-08	6.39706e-08
4.29464e-08	4.33839e-08	4.38224e-08	4.42616e-08	4.47015e-08	4.51419e-08	4.55826e-08	4.60235e-08	4.64646e-08	4.69058e-08	4.73469e-08	4.77879e-08	4.82287e-08	4.86694e-08	4.91097e-08	4.95498e-08	4.99895e-08	5.04289e-08	5.08678e-08	5.13063e-08	5.17443e-08	5.21819e-08	5.26189e-08	5.30554e-08	5.34914e-08	5.39268e-08	5.43617e-08	5.4796e-08	5.52298e-08	5.56629e-08	5.60955e-08	5.65274e-08	5.69588e-08	5.73895e-08	5.78197e-08	5.82492e-08	5.86782e-08	5.91065e-08	5.95342e-08	5.99613e-08	6.03878e-08	6.08137e-08	6.12389e-08	6.16636e-08	6.20877e-08	6.25112e-08	6.2934e-08	6.33563e-08	6.3778e-08	6.4199e-08
4.30954e-08	4.35344e-08	4.39745e-08	4.44153e-08	4.48567e-08	4.52986e-08	4.57408e-08	4.61833e-08	4.66259e-08	4.70686e-08	4.75112e-08	4.79538e-08	4.83962e-08	4.88383e-08	4.92802e-08	4.97218e-08	5.01631e-08	5.0604e-08	5.10444e-08	5.14844e-08	5.1924e-08	5.23631e-08	5.28016e-08	5.32397e-08	5.36772e-08	5.41141e-08	5.45505e-08	5.49863e-08	5.54216e-08	5.58562e-08	5.62903e-08	5.67238e-08	5.71566e-08	5.75889e-08	5.80206e-08	5.84516e-08	5.8882e-08	5.93118e-08	5.97411e-08	6.01696e-08	6.05976e-08	6.1025e-08	6.14518e-08	6.18779e-08	6.23035e-08	6.27284e-08	6.31528e-08	6.35765e-08	6.39997e-08	6.44222e-08
4.3241e-08	4.36815e-08	4.4123e-08	4.45653e-08	4.50082e-08	4.54516e-08	4.58953e-08	4.63393e-08	4.67835e-08	4.72276e-08	4.76718e-08	4.81158e-08	4.85597e-08	4.90034e-08	4.94468e-08	4.98899e-08	5.03326e-08	5.0775e-08	5.12169e-08	5.16584e-08	5.20995e-08	5.25401e-08	5.29801e-08	5.34196e-08	5.38586e-08	5.42971e-08	5.47349e-08	5.51722e-08	5.5609e-08	5.60451e-08	5.64806e-08	5.69156e-08	5.73499e-08	5.77836e-08	5.82168e-08	5.86493e-08	5.90812e-08	5.95124e-08	5.99431e-08	6.03732e-08	6.08026e-08	6.12314e-08	6.16596e-08	6.20872e-08	6.25142e-08	6.29406e-08	6.33664e-08	6.37916e-08	6.42162e-08	6.46402e-08
4.33835e-08	4.38255e-08	4.42684e-08	4.47122e-08	4.51566e-08	4.56014e-08	4.60466e-08	4.64921e-08	4.69377e-08	4.73833e-08	4.78289e-08	4.82744e-08	4.87198e-08	4.91649e-08	4.96098e-08	5.00544e-08	5.04986e-08	5.09424e-08	5.13858e-08	5.18288e-08	5.22713e-08	5.27133e-08	5.31548e-08	5.35958e-08	5.40362e-08	5.44761e-08	5.49154e-08	5.53542e-08	5.57924e-08	5.62299e-08	5.66669e-08	5.71033e-08	5.75391e-08	5.79743e-08	5.84088e-08	5.88427e-08	5.92761e-08	5.97088e-08	6.01409e-08	6.05724e-08	6.10032e-08	6.14335e-08	6.18631e-08	6.22921e-08	6.27206e-08	6.31484e-08	6.35756e-08	6.40022e-08	6.44282e-08	6.48536e-08
4.35235e-08	4.39669e-08	4.44113e-08	4.48565e-08	4.53023e-08	4.57486e-08	4.61953e-08	4.66422e-08	4.70892e-08	4.75363e-08	4.79833e-08	4.84303e-08	4.88771e-08	4.93237e-08	4.977e-08	5.0216e-08	5.06616e-08	5.11069e-08	5.15517e-08	5.19962e-08	5.24401e-08	5.28835e-08	5.33265e-08	5.37689e-08	5.42108e-08	5.46521e-08	5.50928e-08	5.5533e-08	5.59726e-08	5.64116e-08	5.685e-08	5.72878e-08	5.7725e-08	5.81616e-08	5.85975e-08	5.90329e-08	5.94676e-08	5.99017e-08	6.03352e-08	6.07681e-08	6.12004e-08	6.1632e-08	6.20631e-08	6.24935e-08	6.29233e-08	6.33525e-08	6.37811e-08	6.42091e-08	6.46365e-08	6.50633e-08
4.36617e-08	4.41065e-08	4.45523e-08	4.4999e-08	4.54462e-08	4.58939e-08	4.6342e-08	4.67903e-08	4.72388e-08	4.76873e-08	4.81357e-08	4.85841e-08	4.90323e-08	4.94803e-08	4.99281e-08	5.03755e-08	5.08226e-08	5.12693e-08	5.17155e-08	5.21614e-08	5.26067e-08	5.30516e-08	5.34959e-08	5.39397e-08	5.4383e-08	5.48258e-08	5.52679e-08	5.57095e-08	5.61505e-08	5.65909e-08	5.70307e-08	5.74699e-08	5.79085e-08	5.83464e-08	5.87838e-08	5.92205e-08	5.96567e-08	6.00922e-08	6.05271e-08	6.09613e-08	6.1395e-08	6.1828e-08	6.22604e-08	6.26922e-08	6.31234e-08	6.3554e-08	6.39839e-08	6.44133e-08	6.48421e-08	6.52702e-08
4.37988e-08	4.42451e-08	4.46923e-08	4.51403e-08	4.5589e-08	4.60381e-08	4.64876e-08	4.69373e-08	4.73872e-08	4.78371e-08	4.8287e-08	4.87368e-08	4.91864e-08	4.96358e-08	5.0085e-08	5.05338e-08	5.09823e-08	5.14304e-08	5.18781e-08	5.23253e-08	5.27721e-08	5.32183e-08	5.36641e-08	5.41093e-08	5.4554e-08	5.49981e-08	5.54416e-08	5.58846e-08	5.6327e-08	5.67688e-08	5.721e-08	5.76506e-08	5.80905e-08	5.85299e-08	5.89686e-08	5.94068e-08	5.98443e-08	6.02812e-08	6.07174e-08	6.11531e-08	6.15881e-08	6.20225e-08	6.24563e-08	6.28894e-08	6.3322e-08	6.37539e-08	6.41852e-08	6.46159e-08	6.50461e-08	6.54756e-08
4.39357e-08	4.43834e-08	4.4832e-08	4.52814e-08	4.57315e-08	4.6182e-08	4.66329e-08	4.7084e-08	4.75353e-08	4.79866e-08	4.84379e-08	4.88891e-08	4.93402e-08	4.9791e-08	5.02416e-08	5.06918e-08	5.11417e-08	5.15912e-08	5.20403e-08	5.24889e-08	5.29371e-08	5.33847e-08	5.38319e-08	5.42785e-08	5.47246e-08	5.51701e-08	5.56151e-08	5.60594e-08	5.65032e-08	5.69464e-08	5.73889e-08	5.78309e-08	5.82723e-08	5.8713e-08	5.91531e-08	5.95926e-08	6.00315e-08	6.04698e-08	6.09074e-08	6.13444e-08	6.17808e-08	6.22166e-08	6.26517e-08	6.30862e-08	6.35201e-08	6.39534e-08	6.43861e-08	6.48182e-08	6.52497e-08	6.56805e-08
4.40731e-08	4.45222e-08	4.49722e-08	4.5423e-08	4.58745e-08	4.63264e-08	4.67788e-08	4.72313e-08	4.7684e-08	4.81367e-08	4.85895e-08	4.90421e-08	4.94945e-08	4.99468e-08	5.03988e-08	5.08504e-08	5.13017e-08	5.17526e-08	5.22031e-08	5.26532e-08	5.31027e-08	5.35518e-08	5.40004e-08	5.44484e-08	5.48959e-08	5.53428e-08	5.57891e-08	5.62349e-08	5.66801e-08	5.71246e-08	5.75686e-08	5.8012e-08	5.84547e-08	5.88968e-08	5.93383e-08	5.97792e-08	6.02195e-08	6.06591e-08	6.10981e-08	6.15365e-08	6.19743e-08	6.24114e-08	6.28479e-08	6.32838e-08	6.37191e-08	6.41538e-08	6.45878e-08	6.50212e-08	6.54541e-08	6.58863e-08
4.42119e-08	4.46623e-08	4.51138e-08	4.5566e-08	4.60189e-08	4.64723e-08	4.6926e-08	4.738e-08	4.78341e-08	4.82883e-08	4.87425e-08	4.91965e-08	4.96504e-08	5.01041e-08	5.05575e-08	5.10105e-08	5.14633e-08	5.19156e-08	5.23675e-08	5.2819e-08	5.327e-08	5.37205e-08	5.41704e-08	5.46199e-08	5.50688e-08	5.55171e-08	5.59649e-08	5.6412e-08	5.68586e-08	5.73046e-08	5.775e-08	5.81947e-08	5.86389e-08	5.90824e-08	5.95253e-08	5.99676e-08	6.04092e-08	6.08503e-08	6.12907e-08	6.17304e-08	6.21696e-08	6.26081e-08	6.3046e-08	6.34833e-08	6.392e-08	6.4356e-08	6.47914e-08	6.52262e-08	6.56604e-08	6.6094e-08
4.43527e-08	4.48046e-08	4.52575e-08	4.57112e-08	4.61655e-08	4.66204e-08	4.70755e-08	4.7531e-08	4.79866e-08	4.84422e-08	4.88978e-08	4.93533e-08	4.98086e-08	5.02637e-08	5.07186e-08	5.11731e-08	5.16273e-08	5.20811e-08	5.25344e-08	5.29873e-08	5.34398e-08	5.38917e-08	5.43431e-08	5.4794e-08	5.52443e-08	5.56941e-08	5.61433e-08	5.65919e-08	5.70399e-08	5.74873e-08	5.79341e-08	5.83803e-08	5.88259e-08	5.92708e-08	5.97151e-08	6.01588e-08	6.06019e-08	6.10444e-08	6.14862e-08	6.19274e-08	6.23679e-08	6.28078e-08	6.32471e-08	6.36858e-08	6.41239e-08	6.45613e-08	6.49982e-08	6.54344e-08	6.587e-08	6.63049e-08
4.44965e-08	4.49499e-08	4.54043e-08	4.58594e-08	4.63152e-08	4.67715e-08	4.72282e-08	4.76851e-08	4.81422e-08	4.85993e-08	4.90564e-08	4.95133e-08	4.99702e-08	5.04268e-08	5.08831e-08	5.13391e-08	5.17948e-08	5.225e-08	5.27048e-08	5.31592e-08	5.36131e-08	5.40665e-08	5.45194e-08	5.49718e-08	5.54236e-08	5.58748e-08	5.63255e-08	5.67755e-08	5.7225e-08	5.76739e-08	5.81221e-08	5.85698e-08	5.90168e-08	5.94632e-08	5.99089e-08	6.03541e-08	6.07986e-08	6.12425e-08	6.16858e-08	6.21284e-08	6.25704e-08	6.30117e-08	6.34525e-08	6.38926e-08	6.43321e-08	6.4771e-08	6.52092e-08	6.56468e-08	6.60839e-08	6.65203e-08
4.46442e-08	4.50991e-08	4.55549e-08	4.60116e-08	4.6469e-08	4.69268e-08	4.7385e-08	4.78434e-08	4.8302e-08	4.87606e-08	4.92192e-08	4.96777e-08	5.01361e-08	5.05942e-08	5.1052e-08	5.15095e-08	5.19667e-08	5.24235e-08	5.28798e-08	5.33357e-08	5.37912e-08	5.42461e-08	5.47005e-08	5.51543e-08	5.56076e-08	5.60604e-08	5.65125e-08	5.69641e-08	5.74151e-08	5.78654e-08	5.83152e-08	5.87643e-08	5.92128e-08	5.96607e-08	6.0108e-08	6.05546e-08	6.10006e-08	6.1446e-08	6.18907e-08	6.23348e-08	6.27783e-08	6.32211e-08	6.36633e-08	6.41049e-08	6.45459e-08	6.49862e-08	6.54259e-08	6.5865e-08	6.63035e-08	6.67414e-08
4.47967e-08	4.52531e-08	4.57105e-08	4.61688e-08	4.66277e-08	4.70871e-08	4.75468e-08	4.80068e-08	4.8467e-08	4.89272e-08	4.93874e-08	4.98474e-08	5.03074e-08	5.0767e-08	5.12265e-08	5.16856e-08	5.21443e-08	5.26026e-08	5.30605e-08	5.3518e-08	5.3975e-08	5.44315e-08	5.48874e-08	5.53428e-08	5.57977e-08	5.6252e-08	5.67057e-08	5.71588e-08	5.76113e-08	5.80632e-08	5.85145e-08	5.89652e-08	5.94153e-08	5.98647e-08	6.03135e-08	6.07617e-08	6.12092e-08	6.16561e-08	6.21024e-08	6.2548e-08	6.2993e-08	6.34373e-08	6.38811e-08	6.43242e-08	6.47667e-08	6.52085e-08	6.56497e-08	6.60904e-08	6.65303e-08	6.69697e-08
4.49549e-08	4.54129e-08	4.5872e-08	4.63319e-08	4.67924e-08	4.72534e-08	4.77148e-08	4.81764e-08	4.86382e-08	4.91e-08	4.95618e-08	5.00235e-08	5.04851e-08	5.09464e-08	5.14074e-08	5.18682e-08	5.23285e-08	5.27885e-08	5.3248e-08	5.37071e-08	5.41657e-08	5.46238e-08	5.50814e-08	5.55384e-08	5.59949e-08	5.64508e-08	5.69061e-08	5.73608e-08	5.78149e-08	5.82685e-08	5.87214e-08	5.91736e-08	5.96253e-08	6.00763e-08	6.05267e-08	6.09765e-08	6.14256e-08	6.18741e-08	6.23219e-08	6.27691e-08	6.32157e-08	6.36617e-08	6.4107e-08	6.45517e-08	6.49957e-08	6.54391e-08	6.58819e-08	6.63241e-08	6.67657e-08	6.72066e-08
4.51196e-08	4.55793e-08	4.60401e-08	4.65016e-08	4.69639e-08	4.74266e-08	4.78896e-08	4.8353e-08	4.88164e-08	4.928e-08	4.97435e-08	5.02069e-08	5.06701e-08	5.11331e-08	5.15959e-08	5.20583e-08	5.25203e-08	5.2982e-08	5.34432e-08	5.3904e-08	5.43643e-08	5.48241e-08	5.52833e-08	5.5742e-08	5.62002e-08	5.66578e-08	5.71148e-08	5.75712e-08	5.8027e-08	5.84821e-08	5.89367e-08	5.93907e-08	5.9844e-08	6.02967e-08	6.07487e-08	6.12001e-08	6.16509e-08	6.2101e-08	6.25505e-08	6.29994e-08	6.34476e-08	6.38952e-08	6.43422e-08	6.47885e-08	6.52342e-08	6.56793e-08	6.61237e-08	6.65675e-08	6.70107e-08	6.74533e-08
4.52916e-08	4.57531e-08	4.62156e-08	4.66789e-08	4.71429e-08	4.76074e-08	4.80722e-08	4.85373e-08	4.90026e-08	4.94679e-08	4.99331e-08	5.03983e-08	5.08633e-08	5.13281e-08	5.17926e-08	5.22568e-08	5.27206e-08	5.3184e-08	5.3647e-08	5.41096e-08	5.45716e-08	5.50332e-08	5.54942e-08	5.59546e-08	5.64146e-08	5.68739e-08	5.73326e-08	5.77908e-08	5.82483e-08	5.87052e-08	5.91616e-08	5.96172e-08	6.00723e-08	6.05267e-08	6.09805e-08	6.14336e-08	6.18862e-08	6.2338e-08	6.27893e-08	6.32398e-08	6.36898e-08	6.41391e-08	6.45878e-08	6.50358e-08	6.54832e-08	6.593e-08	6.63761e-08	6.68216e-08	6.72665e-08	6.77108e-08
4.54714e-08	4.59347e-08	4.63991e-08	4.68643e-08	4.73301e-08	4.77964e-08	4.82631e-08	4.87301e-08	4.91972e-08	4.96643e-08	5.01315e-08	5.05985e-08	5.10653e-08	5.1532e-08	5.19983e-08	5.24644e-08	5.293e-08	5.33953e-08	5.38602e-08	5.43245e-08	5.47884e-08	5.52518e-08	5.57147e-08	5.6177e-08	5.66387e-08	5.70999e-08	5.75604e-08	5.80204e-08	5.84798e-08	5.89385e-08	5.93967e-08	5.98542e-08	6.0311e-08	6.07673e-08	6.12229e-08	6.16778e-08	6.21322e-08	6.25858e-08	6.30389e-08	6.34912e-08	6.3943e-08	6.43941e-08	6.48446e-08	6.52944e-08	6.57436e-08	6.61921e-08	6.66401e-08	6.70874e-08	6.7534e-08	6.79801e-08
4.56596e-08	4.61248e-08	4.65911e-08	4.70582e-08	4.7526e-08	4.79942e-08	4.84629e-08	4.89318e-08	4.94008e-08	4.98699e-08	5.0339e-08	5.08079e-08	5.12767e-08	5.17453e-08	5.22136e-08	5.26816e-08	5.31492e-08	5.36164e-08	5.40831e-08	5.45494e-08	5.50153e-08	5.54806e-08	5.59453e-08	5.64096e-08	5.68732e-08	5.73363e-08	5.77988e-08	5.82607e-08	5.8722e-08	5.91826e-08	5.96427e-08	6.01021e-08	6.05608e-08	6.1019e-08	6.14765e-08	6.19333e-08	6.23895e-08	6.28451e-08	6.33e-08	6.37543e-08	6.42079e-08	6.46609e-08	6.51132e-08	6.55649e-08	6.6016e-08	6.64664e-08	6.69162e-08	6.73654e-08	6.78139e-08	6.82618e-08
4.58566e-08	4.63239e-08	4.67922e-08	4.72613e-08	4.77311e-08	4.82014e-08	4.8672e-08	4.9143e-08	4.9614e-08	5.00851e-08	5.05562e-08	5.10272e-08	5.14981e-08	5.19687e-08	5.2439e-08	5.2909e-08	5.33786e-08	5.38478e-08	5.43166e-08	5.4785e-08	5.52528e-08	5.57201e-08	5.61869e-08	5.66531e-08	5.71188e-08	5.75839e-08	5.80484e-08	5.85123e-08	5.89756e-08	5.94382e-08	5.99003e-08	6.03617e-08	6.08224e-08	6.12825e-08	6.1742e-08	6.22009e-08	6.26591e-08	6.31166e-08	6.35735e-08	6.40297e-08	6.44853e-08	6.49403e-08	6.53946e-08	6.58483e-08	6.63013e-08	6.67537e-08	6.72054e-08	6.76565e-08	6.8107e-08	6.85569e-08
4.60633e-08	4.65327e-08	4.70031e-08	4.74744e-08	4.79463e-08	4.84187e-08	4.88915e-08	4.93645e-08	4.98377e-08	5.0311e-08	5.07842e-08	5.12573e-08	5.17303e-08	5.2203e-08	5.26755e-08	5.31476e-08	5.36193e-08	5.40907e-08	5.45616e-08	5.5032e-08	5.5502e-08	5.59714e-08	5.64403e-08	5.69087e-08	5.73765e-08	5.78437e-08	5.83103e-08	5.87763e-08	5.92416e-08	5.97064e-08	6.01705e-08	6.0634e-08	6.10969e-08	6.15591e-08	6.20206e-08	6.24815e-08	6.29418e-08	6.34014e-08	6.38604e-08	6.43187e-08	6.47764e-08	6.52334e-08	6.56898e-08	6.61455e-08	6.66006e-08	6.7055e-08	6.75088e-08	6.7962e-08	6.84145e-08	6.88664e-08
4.62812e-08	4.67528e-08	4.72255e-08	4.7699e-08	4.81731e-08	4.86478e-08	4.91228e-08	4.95981e-08	5.00735e-08	5.0549e-08	5.10245e-08	5.14999e-08	5.19751e-08	5.245e-08	5.29247e-08	5.33991e-08	5.38731e-08	5.43467e-08	5.48198e-08	5.52925e-08	5.57647e-08	5.62364e-08	5.67075e-08	5.71781e-08	5.76481e-08	5.81175e-08	5.85863e-08	5.90545e-08	5.95221e-08	5.99891e-08	6.04554e-08	6.09211e-08	6.13861e-08	6.18506e-08	6.23143e-08	6.27774e-08	6.32399e-08	6.37017e-08	6.41628e-08	6.46233e-08	6.50832e-08	6.55424e-08	6.60009e-08	6.64588e-08	6.69161e-08	6.73727e-08	6.78286e-08	6.82839e-08	6.87386e-08	6.91927e-08
4.65132e-08	4.69872e-08	4.74622e-08	4.79381e-08	4.84146e-08	4.88917e-08	4.93691e-08	4.98468e-08	5.03246e-08	5.08025e-08	5.12804e-08	5.17581e-08	5.22357e-08	5.27131e-08	5.31902e-08	5.36669e-08	5.41433e-08	5.46193e-08	5.50948e-08	5.55698e-08	5.60444e-08	5.65184e-08	5.69919e-08	5.74649e-08	5.79373e-08	5.8409e-08	5.88802e-08	5.93508e-08	5.98207e-08	6.029e-08	6.07587e-08	6.12268e-08	6.16942e-08	6.21609e-08	6.2627e-08	6.30925e-08	6.35572e-08	6.40214e-08	6.44848e-08	6.49477e-08	6.54098e-08	6.58713e-08	6.63322e-08	6.67924e-08	6.7252e-08	6.77109e-08	6.81691e-08	6.86268e-08	6.90837e-08	6.95401e-08
4.67646e-08	4.72411e-08	4.77187e-08	4.81971e-08	4.86762e-08	4.91559e-08	4.96359e-08	5.01162e-08	5.05966e-08	5.10771e-08	5.15575e-08	5.20379e-08	5.2518e-08	5.2998e-08	5.34777e-08	5.3957e-08	5.4436e-08	5.49145e-08	5.53926e-08	5.58702e-08	5.63474e-08	5.6824e-08	5.73001e-08	5.77756e-08	5.82505e-08	5.87248e-08	5.91986e-08	5.96717e-08	6.01442e-08	6.06161e-08	6.10873e-08	6.15579e-08	6.20278e-08	6.24971e-08	6.29657e-08	6.34337e-08	6.3901e-08	6.43677e-08	6.48337e-08	6.5299e-08	6.57637e-08	6.62277e-08	6.66911e-08	6.71538e-08	6.76158e-08	6.80772e-08	6.8538e-08	6.89981e-08	6.94576e-08	6.99164e-08
4.7044e-08	4.75234e-08	4.80039e-08	4.84852e-08	4.89671e-08	4.94496e-08	4.99325e-08	5.04157e-08	5.0899e-08	5.13823e-08	5.18657e-08	5.23489e-08	5.2832e-08	5.33148e-08	5.37973e-08	5.42795e-08	5.47614e-08	5.52428e-08	5.57238e-08	5.62043e-08	5.66843e-08	5.71637e-08	5.76427e-08	5.8121e-08	5.85988e-08	5.9076e-08	5.95526e-08	6.00285e-08	6.05039e-08	6.09786e-08	6.14526e-08	6.1926e-08	6.23988e-08	6.28709e-08	6.33423e-08	6.38131e-08	6.42833e-08	6.47527e-08	6.52215e-08	6.56896e-08	6.61571e-08	6.66239e-08	6.70901e-08	6.75556e-08	6.80204e-08	6.84846e-08	6.89481e-08	6.9411e-08	6.98733e-08	7.03349e-08
4.73669e-08	4.78496e-08	4.83333e-08	4.8818e-08	4.93033e-08	4.97891e-08	5.02753e-08	5.07618e-08	5.12484e-08	5.17351e-08	5.22217e-08	5.27083e-08	5.31947e-08	5.36808e-08	5.41667e-08	5.46522e-08	5.51374e-08	5.56221e-08	5.61064e-08	5.65902e-08	5.70735e-08	5.75563e-08	5.80385e-08	5.85202e-08	5.90013e-08	5.94817e-08	5.99616e-08	6.04408e-08	6.09195e-08	6.13974e-08	6.18748e-08	6.23514e-08	6.28275e-08	6.33028e-08	6.37775e-08	6.42516e-08	6.47249e-08	6.51976e-08	6.56697e-08	6.6141e-08	6.66117e-08	6.70818e-08	6.75511e-08	6.80198e-08	6.84879e-08	6.89553e-08	6.9422e-08	6.98881e-08	7.03535e-08	7.08183e-08
4.77611e-08	4.82478e-08	4.87356e-08	4.92243e-08	4.97137e-08	5.02035e-08	5.06938e-08	5.11843e-08	5.1675e-08	5.21658e-08	5.26565e-08	5.31471e-08	5.36375e-08	5.41278e-08	5.46177e-08	5.51073e-08	5.55965e-08	5.60853e-08	5.65736e-08	5.70614e-08	5.75488e-08	5.80356e-08	5.85218e-08	5.90075e-08	5.94926e-08	5.99771e-08	6.0461e-08	6.09442e-08	6.14269e-08	6.19088e-08	6.23902e-08	6.28708e-08	6.33508e-08	6.38302e-08	6.43088e-08	6.47868e-08	6.52642e-08	6.57408e-08	6.62168e-08	6.66921e-08	6.71668e-08	6.76407e-08	6.81141e-08	6.85867e-08	6.90587e-08	6.953e-08	7.00006e-08	7.04706e-08	7.09399e-08	7.14086e-08
4.82735e-08	4.87654e-08	4.92585e-08	4.97524e-08	5.0247e-08	5.07422e-08	5.12377e-08	5.17335e-08	5.22295e-08	5.27255e-08	5.32215e-08	5.37174e-08	5.42131e-08	5.47086e-08	5.52038e-08	5.56987e-08	5.61931e-08	5.66872e-08	5.71808e-08	5.76739e-08	5.81665e-08	5.86585e-08	5.915e-08	5.96409e-08	6.01313e-08	6.0621e-08	6.11101e-08	6.15985e-08	6.20863e-08	6.25735e-08	6.306e-08	6.35459e-08	6.4031e-08	6.45155e-08	6.49994e-08	6.54825e-08	6.5965e-08	6.64468e-08	6.69279e-08	6.74084e-08	6.78882e-08	6.83673e-08	6.88457e-08	6.93234e-08	6.98005e-08	7.02769e-08	7.07526e-08	7.12277e-08	7.17021e-08	7.21758e-08
[truncated: 250 more columns]

## Sheet: Tabelle7
Raw data Figure 7: HDR MULTIFIT evaluation
In Line 4 there are the values for the wavelength in nm. In column A there are the values for the sedimentation coefficient in sved. In the columns B-MT there are the values for the turbidity in a.u.
0	540.53	541.616	542.701	543.785	544.869	545.952	547.035	548.118	549.2	550.282	551.363	552.444	553.525	554.605	555.684	556.763	557.842	558.92	559.998	561.075	562.152	563.229	564.305	565.38	566.456	567.53	568.605	569.678	570.752	571.825	572.897	573.969	575.041	576.112	577.183	578.253	579.323	580.393	581.462	582.53	583.598	584.666	585.733	586.8	587.866	588.932	589.998	591.063	592.127
5105.35	0	0	0	0	0	0	0	0	0	0	0	0	0	0	0	0	0	0	0	0	0	0	0	0	0	0	0	0	0	0	0	0	0	0	0	0	0	0	0	0	0	0	0	0	0	0	0	0	0
5209.82	0	0	0	0	0	0	0	0	0	0	0	0	0	0	0	0	0	0	0	0	0	0	0	0	0	0	0	0	0	0	0	0	0	0	0	0	0	0	0	0	0	0	0	0	0	0	0	0	0
5316.43	0.17451	0.1707	0.16713	0.16499	0.13971	0.13463	0.14731	0.14385	0.16974	0.17335	0.16939	0.15942	0.17379	0.17249	0.18567	0.1947	0.19005	0.19502	0.19139	0.20502	0.20064	0.20276	0.2022	0.19699	0.18008	0.17848	0.182	0.17922	0.19426	0.19715	0.19404	0.18986	0.18516	0.1725	0.17116	0.1758	0.18753	0.1837	0.17976	0.18321	0.18024	0.15761	0.16522	0.17906	0.17795	0.16949	0.18354	0.18562	0.17559
5425.22	0.28316	0.28246	0.27933	0.28061	0.23726	0.23193	0.25127	0.24816	0.29521	0.30506	0.29888	0.2858	0.30964	0.3072	0.33472	0.3481	0.3387	0.34623	0.34083	0.35835	0.35409	0.36138	0.35892	0.35282	0.32573	0.3232	0.32801	0.32537	0.34654	0.35265	0.34638	0.33955	0.33305	0.31663	0.31442	0.32739	0.34646	0.34189	0.33617	0.34168	0.33482	0.29846	0.3091	0.32707	0.32507	0.31064	0.33436	0.33751	0.32454
5536.24	0.34211	0.3471	0.34735	0.3549	0.30124	0.29884	0.32125	0.31929	0.38141	0.3981	0.3902	0.37896	0.40874	0.40457	0.4452	0.46048	0.44672	0.45599	0.45042	0.46611	0.46521	0.47784	0.47246	0.46817	0.43573	0.43221	0.43762	0.43673	0.45923	0.4684	0.45934	0.45067	0.44402	0.42842	0.42611	0.4472	0.47033	0.46772	0.46097	0.46742	0.45801	0.41494	0.42615	0.44299	0.43938	0.42026	0.44947	0.45133	0.44023
5649.53	0.36776	0.37669	0.38129	0.39335	0.33676	0.33848	0.3635	0.36135	0.43214	0.45414	0.44488	0.43663	0.46979	0.46352	0.51228	0.52914	0.5125	0.52395	0.51912	0.53237	0.53556	0.55107	0.54246	0.54046	0.5058	0.50093	0.50704	0.50803	0.53096	0.54189	0.53088	0.52121	0.51501	0.50038	0.49899	0.52496	0.54977	0.55124	0.54331	0.54963	0.54031	0.49532	0.50594	0.5205	0.51436	0.4913	0.52259	0.52059	0.51346
5765.14	0.37786	0.38696	0.39495	0.40707	0.35225	0.35711	0.38591	0.38223	0.45684	0.48119	0.47118	0.464	0.49867	0.49078	0.54204	0.56084	0.54296	0.5568	0.55291	0.56562	0.57161	0.58736	0.57618	0.57531	0.5402	0.53378	0.54072	0.54284	0.56726	0.57835	0.56654	0.55672	0.55097	0.53546	0.53561	0.56313	0.58842	0.59468	0.58555	0.59119	0.58402	0.53915	0.54838	0.56153	0.55278	0.52651	0.55803	0.55166	0.5482
5883.11	0.38475	0.39212	0.40117	0.41027	0.35798	0.36387	0.39564	0.39055	0.46636	0.49042	0.48021	0.47223	0.50736	0.49879	0.5497	0.5698	0.55171	0.56695	0.56355	0.57682	0.58411	0.59911	0.58675	0.58596	0.55109	0.54336	0.55096	0.55338	0.5797	0.59013	0.57821	0.56856	0.56295	0.54575	0.54739	0.5749	0.60033	0.61022	0.60038	0.60512	0.60025	0.55563	0.56308	0.57599	0.56584	0.5375	0.56882	0.55995	0.55833
6003.5	0.38917	0.39544	0.40396	0.41041	0.35924	0.36513	0.3976	0.39237	0.46818	0.49112	0.48091	0.47223	0.50736	0.49879	0.5497	0.5698	0.55171	0.56695	0.56355	0.57682	0.58453	0.59953	0.58717	0.58638	0.5518	0.54365	0.55125	0.55366	0.58068	0.59083	0.57891	0.56926	0.56365	0.54575	0.54797	0.57547	0.60091	0.61213	0.60229	0.6065	0.60242	0.5578	0.56392	0.57682	0.56663	0.53751	0.56883	0.55996	0.55856
6126.35	0.3902	0.39622	0.40458	0.41041	0.35924	0.36513	0.3976	0.39237	0.46818	0.49112	0.48091	0.47223	0.50736	0.49879	0.5497	0.5698	0.55171	0.56695	0.56355	0.57682	0.58453	0.59953	0.58717	0.58638	0.5518	0.54365	0.55125	0.55366	0.58068	0.59083	0.57891	0.56926	0.56365	0.54575	0.54797	0.57547	0.60091	0.61213	0.60229	0.6065	0.60242	0.5578	0.56392	0.57682	0.56663	0.53751	0.56883	0.55996	0.55856
6251.72	0.3902	0.39622	0.40458	0.41041	0.35924	0.36513	0.3976	0.39237	0.46818	0.49112	0.48091	0.47223	0.50736	0.49879	0.5497	0.5698	0.55171	0.56695	0.56355	0.57682	0.58453	0.59953	0.58717	0.58638	0.5518	0.54365	0.55125	0.55366	0.58068	0.59083	0.57891	0.56926	0.56365	0.54575	0.54797	0.57547	0.60091	0.61213	0.60229	0.6065	0.60242	0.5578	0.56392	0.57682	0.56663	0.53751	0.56883	0.55996	0.55856
6379.65	0.3902	0.39622	0.40458	0.41041	0.35924	0.36513	0.3976	0.39237	0.46818	0.49112	0.48091	0.47223	0.50736	0.49879	0.5497	0.5698	0.55171	0.56695	0.56355	0.57682	0.58453	0.59953	0.58717	0.58638	0.5518	0.54365	0.55125	0.55366	0.58068	0.59083	0.57891	0.56926	0.56365	0.54575	0.54797	0.57547	0.60091	0.61213	0.60229	0.6065	0.60242	0.5578	0.56392	0.57682	0.56663	0.53751	0.56883	0.55996	0.55856
6510.2	0.3902	0.39622	0.40458	0.41041	0.35924	0.36513	0.3976	0.39237	0.46818	0.49112	0.48091	0.47223	0.50736	0.49879	0.5497	0.5698	0.55171	0.56695	0.56355	0.57682	0.58453	0.59953	0.58717	0.58638	0.5518	0.54365	0.55125	0.55366	0.58068	0.59083	0.57891	0.56926	0.56365	0.54575	0.54797	0.57547	0.60091	0.61213	0.60229	0.6065	0.60242	0.5578	0.56392	0.57682	0.56663	0.53751	0.56883	0.55996	0.55856
6643.42	0.3902	0.39622	0.40458	0.41041	0.35924	0.36513	0.3976	0.39237	0.46818	0.49112	0.48091	0.47223	0.50736	0.49879	0.5497	0.5698	0.55171	0.56695	0.56355	0.57682	0.58453	0.59953	0.58717	0.58638	0.5518	0.54365	0.55125	0.55366	0.58068	0.59083	0.57891	0.56926	0.56365	0.54575	0.54797	0.57547	0.60091	0.61213	0.60229	0.6065	0.60242	0.5578	0.56392	0.57682	0.56663	0.53751	0.56883	0.55996	0.55856
6779.37	0.3902	0.39622	0.40458	0.41041	0.35924	0.36513	0.3976	0.39237	0.46818	0.49112	0.48091	0.47223	0.50736	0.49879	0.5497	0.5698	0.55171	0.56695	0.56355	0.57682	0.58453	0.59953	0.58717	0.58638	0.5518	0.54365	0.55125	0.55366	0.58068	0.59083	0.57891	0.56926	0.56365	0.54575	0.54797	0.57547	0.60091	0.61213	0.60229	0.6065	0.60242	0.5578	0.56392	0.57682	0.56663	0.53751	0.56883	0.55996	0.55856
6918.1	0.3902	0.39622	0.40458	0.41041	0.35924	0.36513	0.3976	0.39237	0.46818	0.49112	0.48091	0.47223	0.50736	0.49879	0.5497	0.5698	0.55171	0.56695	0.56355	0.57682	0.58453	0.59953	0.58717	0.58638	0.5518	0.54365	0.55125	0.55366	0.58068	0.59083	0.57891	0.56926	0.56365	0.54575	0.54797	0.57547	0.60091	0.61213	0.60229	0.6065	0.60242	0.5578	0.56392	0.57682	0.56663	0.53751	0.56883	0.55996	0.55856
7059.66	0.39254	0.39797	0.40599	0.41248	0.36024	0.36587	0.39892	0.39369	0.46898	0.49184	0.48233	0.47314	0.50845	0.50057	0.55149	0.57097	0.55281	0.56787	0.56369	0.57754	0.58517	0.60017	0.58781	0.58696	0.5518	0.54365	0.55138	0.55383	0.58132	0.59146	0.58005	0.57106	0.56672	0.54835	0.55084	0.57784	0.60248	0.61241	0.60271	0.60759	0.60351	0.55935	0.56589	0.57865	0.56834	0.54016	0.5713	0.562	0.56061
7204.13	0.40667	0.40884	0.41561	0.42485	0.36964	0.37294	0.40851	0.40353	0.47676	0.49837	0.4914	0.48068	0.51686	0.51078	0.5617	0.57879	0.56062	0.57476	0.56886	0.58534	0.59336	0.60871	0.59657	0.59586	0.5583	0.55063	0.55837	0.56105	0.59008	0.60143	0.5905	0.58306	0.58083	0.56092	0.56367	0.58947	0.61185	0.61844	0.60897	0.6152	0.61	0.56712	0.57578	0.58766	0.57763	0.55197	0.58275	0.57279	0.5723
7351.55	0.43018	0.42706	0.43152	0.44554	0.38618	0.38474	0.42315	0.41892	0.48814	0.50806	0.50485	0.49243	0.52961	0.52596	0.57638	0.58943	0.57275	0.58547	0.57795	0.59801	0.60739	0.62261	0.61117	0.6111	0.57023	0.56403	0.57145	0.5743	0.60549	0.61943	0.60796	0.60256	0.60237	0.57999	0.58223	0.60754	0.62725	0.62949	0.62068	0.62834	0.62044	0.57894	0.59101	0.60148	0.59235	0.56989	0.59978	0.58927	0.5903
7501.99	0.4543	0.44618	0.448	0.46698	0.40411	0.3972	0.43699	0.43376	0.49898	0.5179	0.51807	0.50478	0.54223	0.53994	0.58853	0.5973	0.58355	0.59516	0.58684	0.60957	0.62072	0.63472	0.6244	0.62618	0.58288	0.57909	0.586	0.58858	0.62096	0.63809	0.62491	0.62143	0.62237	0.59737	0.598	0.62444	0.64207	0.64097	0.6335	0.64216	0.63068	0.58988	0.60497	0.61387	0.60585	0.58599	0.61468	0.60427	0.60689
7655.5	0.46961	0.45894	0.45889	0.48037	0.41621	0.40618	0.44559	0.44374	0.507	0.52587	0.5279	0.51478	0.55114	0.54892	0.59452	0.60056	0.58969	0.6012	0.5926	0.61641	0.62878	0.64086	0.6314	0.63588	0.59171	0.5902	0.5968	0.59867	0.63041	0.64989	0.63483	0.63262	0.63388	0.60715	0.60611	0.63438	0.65101	0.64856	0.64256	0.65156	0.63707	0.59623	0.61265	0.6202	0.61302	0.59474	0.62248	0.61298	0.61683
7812.16	0.47292	0.46188	0.46127	0.4831	0.42033	0.40977	0.44882	0.44868	0.51178	0.53072	0.53339	0.52027	0.55489	0.55248	0.59517	0.60056	0.5915	0.60383	0.59523	0.61904	0.63158	0.64205	0.63214	0.63871	0.59454	0.59413	0.60073	0.60224	0.6325	0.65289	0.63684	0.63507	0.63632	0.60898	0.60702	0.63641	0.65266	0.65022	0.645	0.654	0.63813	0.5973	0.61372	0.62049	0.61372	0.59615	0.62361	0.6149	0.61944
7972.03	0.47303	0.46196	0.46134	0.48317	0.42262	0.41206	0.45111	0.45267	0.51577	0.53444	0.53711	0.52399	0.55691	0.55467	0.59573	0.60112	0.59258	0.60646	0.59768	0.62111	0.63365	0.64361	0.63214	0.63949	0.59532	0.59491	0.60151	0.60302	0.6325	0.65289	0.63684	0.63507	0.63632	0.60898	0.60702	0.63641	0.65266	0.65155	0.64633	0.65533	0.63946	0.59864	0.61372	0.62049	0.61372	0.59615	0.62361	0.6149	0.61944
8135.16	0.47303	0.46224	0.46156	0.48339	0.42447	0.41392	0.45274	0.45599	0.5191	0.53676	0.53944	0.52697	0.55885	0.5578	0.59972	0.60542	0.59623	0.6112	0.60124	0.62318	0.63539	0.64594	0.63273	0.64008	0.59674	0.59633	0.60233	0.60385	0.63333	0.65289	0.63684	0.63507	0.63632	0.60898	0.60775	0.63714	0.65339	0.65545	0.65023	0.6585	0.64333	0.60251	0.61469	0.62318	0.61641	0.59814	0.62559	0.61662	0.61944
8301.63	0.4752	0.46573	0.46435	0.48619	0.42774	0.41821	0.45555	0.46123	0.52484	0.54073	0.54322	0.53384	0.56503	0.56607	0.61139	0.61811	0.60616	0.62104	0.60942	0.62796	0.63875	0.65079	0.63654	0.64294	0.6024	0.60188	0.60679	0.60787	0.63765	0.65524	0.63953	0.63743	0.63905	0.61206	0.61277	0.64205	0.65841	0.6646	0.65872	0.66469	0.65161	0.61149	0.62037	0.6331	0.62587	0.60546	0.63253	0.62317	0.62204
8471.51	0.48324	0.47594	0.47295	0.49312	0.43381	0.42658	0.46085	0.46927	0.53378	0.54737	0.54882	0.54464	0.57472	0.57758	0.62725	0.63536	0.61919	0.63304	0.62064	0.63506	0.64397	0.65711	0.64266	0.64726	0.6106	0.60985	0.61412	0.61479	0.64532	0.6605	0.64579	0.64239	0.64512	0.6188	0.62225	0.65078	0.66858	0.67755	0.67012	0.67303	0.66346	0.62488	0.63149	0.64896	0.64036	0.61602	0.64213	0.63308	0.62751
8644.87	0.50036	0.49656	0.49136	0.50727	0.44716	0.44238	0.47293	0.48359	0.5483	0.5605	0.55936	0.55889	0.58709	0.59039	0.64201	0.65186	0.63209	0.64455	0.63292	0.64533	0.65254	0.66545	0.65093	0.65404	0.62039	0.61958	0.62424	0.62519	0.65642	0.66955	0.65596	0.64978	0.65404	0.62868	0.63453	0.66216	0.68335	0.6922	0.68308	0.68382	0.67764	0.64162	0.64748	0.66731	0.65687	0.6281	0.6527	0.64577	0.6372
8821.77	0.52467	0.52591	0.51864	0.52849	0.46918	0.46586	0.49372	0.50609	0.57008	0.58424	0.5792	0.57735	0.60297	0.60485	0.65302	0.66532	0.64425	0.65525	0.64521	0.65952	0.66561	0.67725	0.66229	0.66576	0.63304	0.63219	0.63798	0.63971	0.6702	0.68162	0.66808	0.65853	0.66453	0.64068	0.64771	0.67595	0.70133	0.70756	0.69796	0.69914	0.69373	0.66125	0.66726	0.68584	0.67365	0.64234	0.66547	0.66255	0.65303
9002.3	0.54918	0.55599	0.5474	0.55268	0.495	0.49181	0.51875	0.53232	0.59442	0.61516	0.6061	0.59808	0.62098	0.62005	0.65956	0.67535	0.65549	0.66534	0.65641	0.67488	0.68003	0.69001	0.67465	0.68085	0.64799	0.64699	0.65427	0.65601	0.68329	0.69258	0.67769	0.66544	0.67349	0.65214	0.65917	0.69066	0.71885	0.72137	0.71314	0.71811	0.70957	0.68093	0.68796	0.70279	0.68908	0.659	0.68174	0.68255	0.67354
9186.51	0.56794	0.57955	0.57099	0.5766	0.5194	0.51615	0.54354	0.55726	0.61589	0.64641	0.63464	0.6189	0.64009	0.63646	0.66552	0.68592	0.669	0.67814	0.66905	0.69118	0.69489	0.70345	0.68836	0.6977	0.66505	0.66374	0.67212	0.6723	0.69537	0.70146	0.68436	0.67124	0.68148	0.6632	0.66968	0.70618	0.73374	0.7329	0.72681	0.73766	0.72367	0.69858	0.70834	0.71966	0.70499	0.67952	0.70335	0.70421	0.69616
9374.5	0.57941	0.59317	0.58627	0.59713	0.53842	0.53644	0.56459	0.57717	0.63167	0.67199	0.65997	0.63946	0.66096	0.65558	0.67628	0.70075	0.68732	0.69538	0.68562	0.70966	0.71113	0.71898	0.70539	0.71529	0.68331	0.68178	0.69021	0.68769	0.70787	0.71017	0.69146	0.67941	0.69119	0.67554	0.68179	0.72221	0.74586	0.74319	0.73816	0.75376	0.73525	0.71288	0.72653	0.73701	0.72249	0.70312	0.72861	0.725	0.71753
9566.33	0.59482	0.60726	0.60265	0.62057	0.55849	0.55868	0.58626	0.59688	0.64827	0.69487	0.68489	0.66489	0.68865	0.68217	0.69903	0.72418	0.71389	0.71979	0.71071	0.7357	0.73536	0.7433	0.73231	0.73854	0.70651	0.70484	0.71183	0.70692	0.72712	0.72668	0.70843	0.69854	0.71046	0.69549	0.70176	0.74212	0.76138	0.75829	0.75228	0.76886	0.74923	0.72758	0.74496	0.75831	0.74518	0.73099	0.75779	0.74725	0.73936
9762.09	0.62737	0.63488	0.63126	0.65327	0.58761	0.58859	0.61393	0.62249	0.67263	0.71922	0.71203	0.69666	0.72355	0.71576	0.73369	0.75459	0.7463	0.74904	0.74316	0.7691	0.76873	0.77727	0.76942	0.76886	0.73508	0.73362	0.7385	0.7329	0.75582	0.75572	0.74036	0.73204	0.74252	0.72567	0.73117	0.7668	0.78444	0.78157	0.77344	0.78698	0.76968	0.74601	0.76553	0.784	0.77287	0.76116	0.78865	0.77226	0.76331
9961.86	0.67899	0.67833	0.67313	0.69197	0.62418	0.62348	0.64704	0.65417	0.70472	0.74534	0.7397	0.72927	0.75815	0.74851	0.77065	0.78355	0.77506	0.77494	0.77371	0.80071	0.80196	0.81134	0.80542	0.79843	0.76159	0.76093	0.7642	0.7605	0.78684	0.79048	0.77956	0.7714	0.77984	0.75997	0.76299	0.79123	0.81128	0.80841	0.79889	0.80778	0.79457	0.76681	0.78622	0.80916	0.79968	0.78759	0.81514	0.79727	0.78746
10165.7	0.74065	0.73008	0.72164	0.73008	0.66217	0.6585	0.68433	0.69023	0.74146	0.77275	0.76688	0.75724	0.78602	0.77496	0.80219	0.80691	0.79528	0.79403	0.79588	0.82253	0.82529	0.83556	0.82894	0.81958	0.78042	0.78086	0.78427	0.78414	0.81203	0.82046	0.81416	0.8048	0.81217	0.79085	0.78993	0.81133	0.83642	0.83258	0.82351	0.8295	0.8199	0.78793	0.80545	0.82978	0.82112	0.80682	0.83365	0.81957	0.80981
10373.7	0.79669	0.77815	0.76714	0.76229	0.69618	0.69114	0.72342	0.72756	0.77818	0.80032	0.79293	0.77891	0.80578	0.79504	0.82614	0.82672	0.80909	0.80841	0.80964	0.83302	0.83493	0.84646	0.83695	0.83069	0.79214	0.79349	0.79877	0.80202	0.8276	0.83857	0.83553	0.8244	0.83232	0.81311	0.80801	0.82602	0.85596	0.85042	0.84334	0.85048	0.8422	0.80785	0.82266	0.84467	0.83641	0.82015	0.84531	0.83811	0.82971
10586	0.84181	0.82063	0.80996	0.79438	0.73048	0.72886	0.76846	0.76967	0.81839	0.83471	0.82446	0.80343	0.82797	0.81943	0.85206	0.85466	0.82981	0.83043	0.82798	0.84463	0.84228	0.8556	0.84287	0.84318	0.80878	0.81067	0.81804	0.82236	0.84207	0.85149	0.84858	0.83637	0.84567	0.83131	0.82361	0.84319	0.87483	0.86757	0.86298	0.87478	0.86566	0.83172	0.84413	0.86146	0.85394	0.83776	0.86045	0.85971	0.85394
10802.6	0.8897	0.8713	0.86431	0.8427	0.78055	0.78787	0.83138	0.82869	0.87578	0.89051	0.87541	0.849	0.87175	0.86589	0.89773	0.90662	0.87598	0.87779	0.87121	0.8791	0.87071	0.88581	0.87159	0.87818	0.84958	0.85081	0.85831	0.85971	0.87234	0.87719	0.87119	0.8593	0.86949	0.85997	0.85264	0.87808	0.90699	0.89883	0.89596	0.91286	0.90194	0.87102	0.88235	0.8949	0.88869	0.87505	0.89491	0.89726	0.89492
11023.7	0.96703	0.95373	0.9517	0.92851	0.86754	0.88611	0.92756	0.92113	0.96775	0.98299	0.96114	0.93377	0.95542	0.95088	0.98008	0.99501	0.96255	0.9647	0.95575	0.95683	0.9438	0.95944	0.94668	0.95576	0.9306	0.92895	0.93357	0.92805	0.93572	0.93616	0.92609	0.91538	0.92469	0.91749	0.91336	0.94598	0.96912	0.96146	0.95875	0.97756	0.965	0.93861	0.95072	0.96013	0.95571	0.94523	0.96229	0.96317	0.96439
11249.3	1.09092	1.08181	1.08267	1.06134	1.00039	1.02672	1.06047	1.05174	1.09887	1.1138	1.08538	1.06126	1.08161	1.07559	1.10133	1.11827	1.08852	1.09092	1.08195	1.08152	1.06742	1.08112	1.07144	1.07775	1.05077	1.04381	1.0438	1.03015	1.03747	1.03661	1.02435	1.01413	1.02071	1.01205	1.0122	1.04992	1.06723	1.06156	1.05761	1.07318	1.05987	1.03809	1.05154	1.06005	1.05777	1.0483	1.06309	1.05935	1.06354
11479.5	1.25071	1.24445	1.24433	1.22702	1.16412	1.18993	1.21218	1.20221	1.25003	1.26197	1.23028	1.21142	1.22892	1.21792	1.24053	1.25482	1.23012	1.23394	1.22653	1.22976	1.21775	1.22697	1.21871	1.21831	1.18464	1.1714	1.16748	1.14877	1.1604	1.16246	1.15155	1.14	1.14328	1.1304	1.13346	1.17184	1.18571	1.18321	1.17753	1.18583	1.17259	1.1546	1.16773	1.17677	1.17707	1.16508	1.17889	1.1705	1.17674
11714.4	1.41415	1.41079	1.40729	1.39338	1.32728	1.34389	1.35358	1.34141	1.38982	1.3964	1.36651	1.35198	1.36488	1.34629	1.36717	1.37564	1.35497	1.36133	1.3556	1.36366	1.35523	1.35926	1.34842	1.34056	1.29892	1.28077	1.27531	1.25718	1.27496	1.28309	1.27642	1.26172	1.26275	1.2456	1.24798	1.28211	1.29543	1.29695	1.28997	1.29057	1.27794	1.26261	1.27251	1.28215	1.28537	1.26866	1.28358	1.27325	1.28067
11954.1	1.5498	1.55036	1.54324	1.52929	1.46004	1.46311	1.46172	1.44583	1.49411	1.49491	1.47111	1.45855	1.46553	1.43911	1.45996	1.46177	1.44152	1.45025	1.4453	1.45471	1.44977	1.45009	1.43349	1.42062	1.37402	1.35421	1.34955	1.3361	1.35792	1.37286	1.37047	1.35185	1.35281	1.33347	1.331	1.35755	1.37246	1.37817	1.37107	1.36745	1.35572	1.34172	1.34635	1.35568	1.36104	1.34063	1.35885	1.35007	1.35828
12198.7	1.6494	1.65304	1.6433	1.62375	1.55125	1.54209	1.53328	1.51315	1.56026	1.55731	1.54105	1.52788	1.52911	1.4972	1.51903	1.51551	1.49213	1.50078	1.49594	1.50101	1.49811	1.49735	1.47508	1.46077	1.41474	1.39653	1.39366	1.38489	1.40594	1.42531	1.42452	1.40273	1.40583	1.38696	1.37767	1.39657	1.41337	1.42264	1.41717	1.41419	1.40316	1.38961	1.38952	1.39679	1.40228	1.38212	1.40443	1.39898	1.40845
12448.4	1.74329	1.74644	1.73461	1.7042	1.62671	1.61025	1.59826	1.57478	1.61942	1.61579	1.60518	1.58898	1.58653	1.55267	1.5751	1.56789	1.54029	1.54432	1.5392	1.53556	1.53252	1.53243	1.50772	1.49459	1.45402	1.43886	1.43679	1.42873	1.44458	1.46395	1.46114	1.43883	1.44533	1.42841	1.41368	1.42785	1.44445	1.45604	1.45331	1.45438	1.44346	1.43071	1.42872	1.43227	1.43513	1.41996	1.44474	1.44177	1.45359
12703.1	1.89973	1.89608	1.88145	1.83823	1.75188	1.73266	1.72126	1.69529	1.73519	1.73248	1.72294	1.7013	1.69811	1.66491	1.68593	1.67494	1.6439	1.63816	1.63155	1.61842	1.61288	1.61312	1.59043	1.57939	1.5458	1.53253	1.52882	1.5161	1.52499	1.5397	1.53254	1.51302	1.52248	1.50655	1.49024	1.50358	1.51692	1.52919	1.52918	1.53475	1.52311	1.51215	1.51184	1.51132	1.5091	1.50168	1.5258	1.52258	1.53724
12963	2.18904	2.17265	2.15417	2.101	2.00256	1.98219	1.97335	1.94419	1.97541	1.97184	1.95806	1.92917	1.92711	1.89528	1.91246	1.89551	1.86125	1.84253	1.83127	1.8109	1.80035	1.79864	1.7804	1.77063	1.74146	1.72656	1.71859	1.6977	1.7012	1.70794	1.69601	1.68118	1.69127	1.67316	1.65889	1.67457	1.68262	1.69397	1.6955	1.7038	1.69111	1.683	1.68673	1.68371	1.67563	1.67476	1.69545	1.68903	1.70595
13228.3	2.64344	2.61118	2.58771	2.52995	2.41922	2.39512	2.38837	2.35441	2.37203	2.36328	2.34156	2.30453	2.30191	2.27004	2.28105	2.2549	2.21577	2.18532	2.16517	2.1404	2.12302	2.11638	2.10038	2.08962	2.05989	2.03924	2.02542	1.99688	1.99838	1.99611	1.97988	1.96834	1.97552	1.9518	1.94054	1.95975	1.96285	1.97222	1.97356	1.98223	1.96977	1.96501	1.9726	1.97026	1.95779	1.95864	1.97509	1.96397	1.98147
13499	3.24158	3.19536	3.16595	3.10771	2.98758	2.9556	2.94792	2.90804	2.90921	2.89088	2.85949	2.81398	2.80569	2.77044	2.77362	2.73623	2.68892	2.65142	2.61894	2.5907	2.56517	2.5516	2.53176	2.51736	2.48225	2.45341	2.43388	2.40086	2.40279	2.39257	2.37237	2.35967	2.36075	2.33004	2.3196	2.34138	2.34189	2.34938	2.34825	2.35594	2.3462	2.34366	2.35254	2.35442	2.34062	2.33713	2.35111	2.3365	2.35206
13775.2	3.92717	3.87281	3.83646	3.77683	3.65023	3.6071	3.59292	3.54669	3.5323	3.5019	3.45985	3.40619	3.38626	3.34348	3.33789	3.28971	3.23031	3.19037	3.14485	3.11207	3.07829	3.05761	3.02752	3.00714	2.96378	2.92722	2.90355	2.86941	2.87141	2.85547	2.83057	2.8114	2.80423	2.76806	2.75463	2.77652	2.77701	2.78399	2.77817	2.78492	2.78013	2.77711	2.78387	2.79161	2.77881	2.76674	2.78132	2.76664	2.77802
14057.1	4.63766	4.58173	4.53778	4.47039	4.33771	4.28162	4.25382	4.20012	4.17433	4.13116	4.07743	4.01624	3.9807	3.9267	3.91218	3.85542	3.78143	3.74114	3.68506	3.64595	3.60539	3.57908	3.53495	3.5067	3.45421	3.41285	3.38651	3.35276	3.35222	3.33331	3.30202	3.27278	3.25676	3.21862	3.19913	3.21846	3.22003	3.2283	3.21665	3.22301	3.22331	3.21702	3.21983	3.23197	3.22071	3.20003	3.2178	3.20658	3.21272
14344.8	5.33315	5.27998	5.22875	5.14607	5.00505	4.93506	4.88829	4.82475	4.79186	4.73658	4.67047	4.60132	4.54963	4.48246	4.45863	4.39515	4.3065	4.26412	4.20105	4.15485	4.10901	4.07914	4.02171	3.98424	3.92239	3.88028	3.85111	3.81673	3.81094	3.79138	3.75227	3.71238	3.68807	3.65103	3.6249	3.63986	3.64247	3.65299	3.63621	3.64214	3.64515	3.63361	3.63395	3.64699	3.63672	3.61131	3.63318	3.6267	3.62816
14638.3	6.00804	5.95718	5.8989	5.79616	5.64262	5.55763	5.49067	5.41503	5.37691	5.31058	5.23245	5.15383	5.08864	5.00864	4.97436	4.90392	4.80247	4.75287	4.68473	4.63195	4.58093	4.54829	4.48198	4.43464	4.36309	4.32317	4.28922	4.25179	4.2399	4.22072	4.17382	4.12568	4.09425	4.05904	4.02836	4.03829	4.04211	4.05425	4.03456	4.03998	4.04233	4.02479	4.02672	4.03766	4.02705	4.0021	4.02693	4.02379	4.02258
14937.9	6.67955	6.62586	6.5591	6.43591	6.26529	6.16354	6.07868	5.99066	5.94632	5.86947	5.78027	5.69096	5.61647	5.52559	5.47924	5.39966	5.28799	5.22463	5.1502	5.09172	5.03432	4.99747	4.92757	4.8709	4.78946	4.75158	4.70992	4.66748	4.65074	4.63153	4.57867	4.52668	4.48972	4.45443	4.42267	4.4281	4.43397	4.44581	4.42614	4.43192	4.43063	4.40724	4.41457	4.4222	4.40971	4.38919	4.41518	4.41257	4.41209
15243.6	7.37012	7.30668	7.22881	7.08843	6.89788	6.77802	6.67929	6.58036	6.52736	6.44006	6.34053	6.23986	6.16029	6.05977	5.99966	5.90832	5.78869	5.70585	5.62208	5.55809	5.49257	5.44831	5.37816	5.31375	5.22295	5.18345	5.13183	5.08388	5.06395	5.04328	4.98723	4.93608	4.89551	4.85678	4.82639	4.82864	4.83715	4.8464	4.82944	4.83753	4.83105	4.80279	4.81605	4.82074	4.80565	4.79054	4.8167	4.81259	4.81681
15555.5	8.09722	8.0177	7.92639	7.77319	7.56253	7.42405	7.31628	7.20833	7.14383	7.0464	6.93617	6.82306	6.74045	6.62946	6.55355	6.44932	6.32256	6.21769	6.12173	6.05165	5.97641	5.9214	5.85077	5.78029	5.68192	5.63546	5.57377	5.52113	5.4993	5.47478	5.41758	5.37022	5.32778	5.28245	5.25323	5.25386	5.26397	5.2692	5.25664	5.26903	5.25785	5.22615	5.24211	5.24461	5.22778	5.21584	5.24296	5.23714	5.24885
15873.8	8.86894	8.77014	8.66453	8.50137	8.27305	8.11538	8.00149	7.88474	7.80562	7.69798	7.57594	7.44872	7.36188	7.23785	7.14451	7.02812	6.89329	6.76798	6.65869	6.58126	6.49511	6.42789	6.35344	6.27817	6.175	6.11739	6.04773	5.99182	5.96845	5.93712	5.87889	5.83483	5.79122	5.73738	5.70677	5.70658	5.7152	5.71667	5.7085	5.72573	5.71261	5.67916	5.69288	5.6938	5.67755	5.66463	5.69493	5.6889	5.70813
16198.6	9.67609	9.55894	9.4399	9.26654	9.02449	8.84632	8.72556	8.5973	8.50038	8.38054	8.2454	8.10231	8.00803	7.86877	7.75879	7.63231	7.48727	7.34661	7.22466	7.13813	7.04056	6.96287	6.87982	6.80038	6.69478	6.62517	6.55057	6.49226	6.46675	6.42604	6.36464	6.3194	6.27419	6.21187	6.17702	6.17589	6.17982	6.1791	6.17319	6.19351	6.18213	6.14817	6.15644	6.15708	6.14413	6.12654	6.16255	6.1583	6.18187
16530.1	10.491	10.3596	10.2302	10.0433	9.7908	9.59064	9.45915	9.31366	9.19704	9.06186	8.91344	8.7542	8.6498	8.49545	8.3728	8.23818	8.08047	7.93088	7.79767	7.70062	7.59198	7.50811	7.41269	7.32902	7.22127	7.14249	7.0652	7.00374	6.97519	6.92446	6.8563	6.80328	6.75523	6.68613	6.64588	6.64343	6.64218	6.64096	6.63341	6.65315	6.64603	6.61087	6.61444	6.61752	6.60922	6.58576	6.6289	6.62804	6.65106
16868.4	11.2751	11.1349	11.0003	10.7951	10.5337	10.3123	10.1662	9.99735	9.8625	9.70954	9.54907	9.37525	9.26043	9.09327	8.9635	8.82143	8.64944	8.49593	8.35254	8.24468	8.12663	8.04128	7.9326	7.84425	7.73208	7.6489	7.56909	7.50258	7.47013	7.41165	7.33366	7.26771	7.21471	7.14129	7.0967	7.09244	7.08941	7.08884	7.07589	7.09105	7.08803	7.04862	7.05145	7.06053	7.05614	7.02878	7.07817	7.08131	7.09937
17213.6	11.996	11.8505	11.716	11.4897	11.2186	10.9792	10.8174	10.6227	10.4745	10.3031	10.133	9.94796	9.8246	9.64776	9.5154	9.36499	9.17843	9.02208	8.86891	8.75163	8.62684	8.54244	8.42325	8.32996	8.20988	8.12658	8.04255	7.96942	7.93236	7.87024	7.78171	7.70196	7.64146	7.56549	7.51902	7.51192	7.51305	7.51334	7.49334	7.50146	7.49981	7.45204	7.45827	7.47599	7.47304	7.44581	7.49813	7.50515	7.51636
17565.8	12.6402	12.4897	12.357	12.1109	11.8269	11.5739	11.399	11.1831	11.0283	10.841	10.6633	10.4713	10.3419	10.1576	10.0232	9.86294	9.66262	9.49976	9.33693	9.21298	9.08435	8.99943	8.87511	8.77735	8.64673	8.56484	8.47516	8.39529	8.3525	8.29038	8.1935	8.1033	8.03354	7.95556	7.90896	7.89754	7.90833	7.90865	7.88322	7.88498	7.88094	7.82203	7.83303	7.85947	7.8547	7.83138	7.88218	7.89268	7.89833
17925.3	13.2079	13.0506	12.9164	12.6552	12.3555	12.092	11.9085	11.6828	11.5275	11.3305	11.1463	10.951	10.8164	10.6251	10.4848	10.3136	10.1005	9.92523	9.7532	9.62561	9.49531	9.40495	9.28168	9.18082	9.03916	8.95677	8.86263	8.77729	8.72681	8.66632	8.56526	8.46978	8.39067	8.31045	8.26297	8.24639	8.26872	8.26796	8.24164	8.24114	8.23179	8.16276	8.17639	8.20784	8.19855	8.1805	8.22654	8.23944	8.24366
18292.1	13.7006	13.5357	13.3945	13.1235	12.808	12.5362	12.348	12.125	11.9733	11.7737	11.5827	11.3848	11.2436	11.0438	10.8922	10.7106	10.4867	10.2948	10.1148	9.98537	9.85401	9.75246	9.63433	9.5322	9.38141	9.29455	9.20007	9.1113	9.0508	8.99128	8.89056	8.7939	8.70732	8.62484	8.57328	8.55201	8.58231	8.58017	8.55848	8.56165	8.54631	8.4729	8.4843	8.51382	8.4989	8.48485	8.52552	8.5394	8.5477
18666.4	14.1189	13.9483	13.7958	13.5184	13.1921	12.913	12.7211	12.5074	12.36	12.1617	11.9623	11.7596	11.6095	11.4001	11.2346	11.0451	10.8142	10.6062	10.4201	10.2884	10.1547	10.0384	9.92566	9.82352	9.66748	9.57286	9.48277	9.39205	9.3207	9.25981	9.16234	9.06639	8.9758	8.8915	8.83255	8.8084	8.8389	8.83625	8.82305	8.83427	8.81518	8.74511	8.74917	8.76934	8.74952	8.73645	8.77351	8.78739	8.80414
19048.4	14.4652	14.2928	14.1294	13.8475	13.5176	13.2329	13.0353	12.8283	12.681	12.4834	12.2738	12.0628	11.9031	11.6856	11.5079	11.3145	11.0819	10.8637	10.6729	10.5368	10.3981	10.268	10.1565	10.0538	9.89747	9.79456	9.71139	9.61925	9.53965	9.47476	9.38072	9.28548	9.19487	9.10924	9.04243	9.01777	9.04009	9.03807	9.03345	9.05253	9.03402	8.97264	8.96709	8.9741	8.95157	8.93628	8.97255	8.98612	9.01201
19438.2	14.7491	14.5785	14.4091	14.1235	13.7964	13.5081	13.3021	13.0922	12.9383	12.7372	12.5171	12.2955	12.1275	11.9061	11.7213	11.5275	11.2984	11.0789	10.8838	10.7411	10.5946	10.4554	10.3386	10.2328	10.0803	9.97152	9.8941	9.80092	9.71955	9.6491	9.55641	9.46086	9.37313	9.28603	9.21521	9.19213	9.20178	9.20085	9.20059	9.22232	9.20852	9.15582	9.14267	9.13927	9.11689	9.0974	9.13567	9.14906	9.18024
19836	14.9855	14.8179	14.649	14.3605	14.0382	13.7484	13.5317	13.3084	13.1427	12.9331	12.7047	12.474	12.3007	12.079	11.8927	11.7001	11.4766	11.2634	11.0643	10.9146	10.7588	10.6174	10.4891	10.3774	10.23	10.1193	10.0433	9.9497	9.87465	9.79885	9.70501	9.6078	9.52387	9.43449	9.366	9.34532	9.34401	9.34358	9.34111	9.35843	9.35085	9.30217	9.28657	9.28078	9.26066	9.23727	9.27911	9.29222	9.32204
20241.9	15.1948	15.0289	14.8651	14.5748	14.2539	13.9634	13.7352	13.4935	13.3149	13.0936	12.8606	12.6261	12.4505	12.2292	12.0454	11.8528	11.6324	11.4284	11.2255	11.071	10.9069	10.7695	10.6277	10.5086	10.3641	10.255	10.1751	10.0813	10.0181	9.93891	9.84271	9.74272	9.6617	9.56904	9.50754	9.48818	9.48246	9.48121	9.47109	9.47962	9.47591	9.42513	9.41254	9.41342	9.39586	9.37104	9.41647	9.42847	9.45063
20656.1	15.4028	15.2353	15.0761	14.784	14.4574	14.1661	13.9276	13.6709	13.483	13.2506	13.0168	12.785	12.6079	12.3845	12.2044	12.0085	11.7852	11.588	11.3821	11.2259	11.0569	10.9267	10.7751	10.6493	10.5029	10.3967	10.3087	10.214	10.1623	10.0826	9.98472	9.88152	9.8016	9.70538	9.6506	9.63046	9.62779	9.62455	9.60525	9.60547	9.60045	9.5436	9.53674	9.54984	9.53372	9.51077	9.55865	9.56884	9.58041
21078.8	15.6307	15.4566	15.2963	15.0008	14.6618	14.3683	14.123	13.8618	13.67	13.4314	13.1986	12.9742	12.7943	12.5653	12.3875	12.1851	11.9527	11.7563	11.5489	11.3928	11.2231	11.0992	10.9453	10.815	10.6618	10.5569	10.4598	10.3624	10.3162	10.2391	10.1408	10.0345	9.95334	9.85478	9.80189	9.78026	9.78546	9.77998	9.75426	9.75033	9.73837	9.67537	9.67331	9.69739	9.68134	9.66282	9.71162	9.7201	9.72362
21510.1	15.8736	15.6889	15.5198	15.2183	14.8645	14.5662	14.3184	14.0641	13.8729	13.6346	13.403	13.1863	13.0017	12.7652	12.5869	12.3772	12.1336	11.9323	11.725	11.5684	11.4006	11.2784	11.1291	10.9972	10.835	10.7279	10.6242	10.5237	10.4741	10.4009	10.3033	10.1939	10.1096	10.0113	9.95466	9.93359	9.94743	9.94012	9.91347	9.90977	9.88747	9.82171	9.82114	9.84845	9.83199	9.81848	9.86688	9.87466	9.87709
21950.3	16.0999	15.9033	15.7206	15.412	15.0461	14.7407	14.4941	14.2531	14.0633	13.8301	13.5975	13.3853	13.1952	12.9533	12.7719	12.5575	12.3059	12.0972	11.8909	11.7316	11.5658	11.4392	11.2969	11.165	10.9958	10.8839	10.7781	10.6753	10.6156	10.5457	10.4484	10.3362	10.2486	10.1535	10.0905	10.0737	10.0935	10.085	10.0631	10.0617	10.0295	9.96564	9.96332	9.9839	9.96772	9.95762	10.0046	10.0132	10.0219
22399.5	16.2765	16.0714	15.8761	15.5624	15.1912	14.8785	14.634	14.4047	14.2135	13.9859	13.7488	13.5363	13.3421	13.0993	12.9141	12.6997	12.4459	12.2308	12.0249	11.861	11.6948	11.5594	11.4216	11.2899	11.1188	11.0014	10.8979	10.7943	10.7231	10.6539	10.5558	10.4419	10.3526	10.2626	10.1952	10.1852	10.2065	10.1972	10.1834	10.1836	10.1466	10.0876	10.082	10.0896	10.0746	10.0645	10.1098	10.1212	10.139
22857.8	16.3945	16.1868	15.9846	15.6708	15.3016	14.9833	14.7387	14.5131	14.3173	14.0917	13.8457	13.6293	13.4331	13.1937	13.0051	12.7941	12.5431	12.3252	12.1175	11.9483	11.7794	11.6351	11.497	11.3643	11.1974	11.0761	10.9769	10.8729	10.7945	10.7223	10.6218	10.5086	10.4198	10.335	10.2684	10.2641	10.2828	10.2732	10.2669	10.2674	10.2331	10.1787	10.1704	10.1656	10.1516	10.1375	10.1819	10.1981	10.2221
23325.6	16.4701	16.2651	16.0636	15.7542	15.3915	15.0715	14.8231	14.5919	14.3895	14.1603	13.9022	13.6807	13.4842	13.2488	13.0579	12.8506	12.604	12.3871	12.1761	12.0022	11.8299	11.6806	11.538	11.4036	11.2449	11.1229	11.0266	10.9219	10.8426	10.7643	10.6608	10.5514	10.464	10.3832	10.3222	10.3189	10.3327	10.3231	10.3207	10.321	10.2964	10.2434	10.2343	10.2233	10.2086	10.1879	10.2327	10.2541	10.2783
23802.9	16.5305	16.33	16.1356	15.8321	15.4759	15.159	14.9051	14.6616	14.453	14.2156	13.9448	13.7188	13.5227	13.288	13.0969	12.8912	12.6471	12.4329	12.219	12.0412	11.8664	11.7186	11.5697	11.434	11.2838	11.164	11.0668	10.9608	10.8852	10.7999	10.694	10.5908	10.5047	10.4259	10.3718	10.3637	10.3725	10.3636	10.3602	10.3609	10.349	10.2941	10.2862	10.2761	10.259	10.232	10.2778	10.3028	10.322
24290	16.6009	16.4036	16.2184	15.9185	15.5647	15.2544	14.9956	14.7385	14.5261	14.2787	13.9985	13.7691	13.574	13.336	13.147	12.94	12.6948	12.4822	12.267	12.0858	11.9101	11.7689	11.6145	11.4789	11.3339	11.2171	11.1153	11.0082	10.9377	10.8474	10.7409	10.6433	10.5577	10.4787	10.4291	10.4127	10.4184	10.4108	10.403	10.4048	10.4028	10.3448	10.3389	10.3339	10.3147	10.2843	10.33	10.3557	10.3687
24787	16.6912	16.4942	16.3159	16.0153	15.6578	15.3539	15.0928	14.8258	14.6125	14.3573	14.074	13.8427	13.6491	13.4061	13.221	13.0106	12.7615	12.5477	12.3323	12.1475	11.9718	11.8388	11.6811	11.5466	11.4024	11.2875	11.1791	11.0716	11.0045	10.9122	10.8071	10.7127	10.6269	10.5462	10.4967	10.473	10.4779	10.4719	10.4592	10.4624	10.4633	10.4039	10.3991	10.3992	10.3796	10.35	10.3937	10.4173	10.4263
25294.3	16.7911	16.5911	16.4153	16.1107	15.745	15.4444	15.1837	14.9127	14.7009	14.4428	14.1626	13.9308	13.7384	13.4924	13.3105	13.0961	12.8429	12.6254	12.4097	12.2212	12.0451	11.9179	11.7591	11.6264	11.4797	11.365	11.2503	11.143	11.0756	10.9841	10.8817	10.7872	10.7017	10.619	10.5663	10.5393	10.5447	10.5402	10.5247	10.5283	10.5253	10.4674	10.4621	10.4646	10.4468	10.4209	10.4612	10.4812	10.49
25811.9	16.88	16.6742	16.4966	16.1869	15.8115	15.5101	15.2512	14.9814	14.7719	14.5161	14.2417	14.0106	13.8183	13.5726	13.3912	13.1737	12.918	12.6968	12.48	12.2877	12.111	11.9854	11.827	11.6959	11.5462	11.4301	11.3115	11.2042	11.133	11.0437	10.9441	10.8473	10.763	10.6791	10.6228	10.5966	10.6026	10.5991	10.5836	10.5863	10.5757	10.5217	10.5147	10.5161	10.5013	10.4798	10.5162	10.5326	10.5444
26340.1	16.9422	16.7297	16.548	16.2337	15.8503	15.5451	15.2882	15.0216	14.8141	14.5637	14.2935	14.0635	13.8702	13.627	13.4429	13.2238	12.968	12.7446	12.5266	12.3312	12.1542	12.0268	11.869	11.7392	11.5874	11.4698	11.3498	11.2422	11.1658	11.0789	10.9811	10.8816	10.7989	10.7148	10.6567	10.6335	10.6397	10.6363	10.6226	10.6233	10.6056	10.5554	10.5467	10.5452	10.5331	10.5144	10.5482	10.5625	10.5785
26879.1	16.9731	16.7554	16.5703	16.2531	15.8653	15.5561	15.3002	15.0362	14.8299	14.5843	14.3153	14.0864	13.8917	13.6507	13.4631	13.2436	12.9889	12.7649	12.5464	12.3491	12.1723	12.0422	11.8848	11.7555	11.6031	11.4844	11.3646	11.2567	11.1765	11.091	10.9939	10.8928	10.8113	10.7272	10.6693	10.6491	10.655	10.6515	10.6394	10.638	10.6161	10.5678	10.558	10.5542	10.5439	10.5261	10.5591	10.5729	10.5918
27429.1	16.9805	16.7609	16.5747	16.2567	15.8678	15.5567	15.3008	15.0375	14.8314	14.5877	14.3188	14.0902	13.8948	13.6546	13.4652	13.2456	12.9918	12.7678	12.5495	12.3516	12.1749	12.0436	11.8862	11.757	11.6046	11.4857	11.3662	11.2582	11.1767	11.0916	10.9945	10.8932	10.812	10.7279	10.6707	10.6517	10.6576	10.6539	10.6423	10.6398	10.6168	10.5684	10.5585	10.5542	10.5446	10.5268	10.5598	10.5736	10.5931
27990.4	16.9805	16.7609	16.5747	16.2567	15.8678	15.5567	15.3008	15.0375	14.8314	14.5877	14.3188	14.0902	13.8948	13.6546	13.4652	13.2456	12.9918	12.7678	12.5495	12.3516	12.1749	12.0436	11.8862	11.757	11.6046	11.4857	11.3662	11.2582	11.1767	11.0916	10.9945	10.8932	10.812	10.7279	10.6707	10.6517	10.6576	10.6539	10.6423	10.6398	10.6168	10.5684	10.5585	10.5542	10.5446	10.5268	10.5598	10.5736	10.5931
28563.2	16.9805	16.7609	16.5747	16.2567	15.8678	15.5567	15.3008	15.0375	14.8314	14.5877	14.3188	14.0902	13.8948	13.6546	13.4652	13.2456	12.9918	12.7678	12.5495	12.3516	12.1749	12.0436	11.8862	11.757	11.6046	11.4857	11.3662	11.2582	11.1767	11.0916	10.9945	10.8932	10.812	10.7279	10.6707	10.6517	10.6576	10.6539	10.6423	10.6398	10.6168	10.5684	10.5585	10.5542	10.5446	10.5268	10.5598	10.5736	10.5931
29147.7	16.9831	16.7629	16.5763	16.2567	15.8678	15.5567	15.3008	15.0375	14.8314	14.5877	14.3188	14.0902	13.8948	13.6546	13.4652	13.2456	12.9918	12.7678	12.5495	12.3516	12.1749	12.0436	11.8862	11.757	11.6046	11.4857	11.3662	11.2582	11.1767	11.0916	10.9945	10.8932	10.812	10.7279	10.6707	10.6517	10.6576	10.6539	10.6423	10.6398	10.6168	10.5684	10.5585	10.5542	10.5446	10.5268	10.5598	10.5736	10.5931
29744.2	16.9907	16.7695	16.5816	16.2575	15.8697	15.5586	15.302	15.0387	14.8326	14.5885	14.3214	14.0931	13.8977	13.6576	13.4678	13.2464	12.9923	12.7683	12.55	12.3516	12.1759	12.0447	11.8873	11.7582	11.6063	11.4865	11.3669	11.2589	11.1773	11.0919	10.9948	10.8937	10.8125	10.7287	10.6712	10.6522	10.6579	10.6542	10.6423	10.6398	10.6171	10.569	10.5591	10.5549	10.5452	10.5271	10.5598	10.5736	10.5931
30352.8	17.0016	16.782	16.5919	16.2618	15.8778	15.5666	15.3076	15.0448	14.8384	14.593	14.3311	14.1037	13.9075	13.6669	13.4765	13.251	12.9961	12.7725	12.5542	12.355	12.1818	12.05	11.8923	11.7642	11.6135	11.4904	11.3703	11.2632	11.1805	11.0945	10.9973	10.8973	10.8163	10.7342	10.6753	10.6567	10.662	10.6571	10.6435	10.641	10.6193	10.5716	10.5626	10.559	10.5497	10.5304	10.563	10.576	10.595
30973.9	17.0118	16.7992	16.6068	16.2741	15.8962	15.5852	15.3225	15.0616	14.8538	14.6062	14.3519	14.1245	13.9253	13.6835	13.4922	13.2627	13.0069	12.7848	12.567	12.3669	12.1965	12.0628	11.9035	11.7771	11.6278	11.4989	11.3785	11.2743	11.1887	11.1022	11.0051	10.9065	10.826	10.7479	10.6864	10.669	10.6743	10.6667	10.6494	10.6477	10.6274	10.5787	10.5717	10.5695	10.5608	10.539	10.5722	10.5843	10.6018
31607.8	17.0178	16.8176	16.6234	16.2948	15.924	15.6133	15.3464	15.0893	14.8781	14.6283	14.3812	14.1525	13.9477	13.7041	13.5119	13.2808	13.0248	12.8055	12.5884	12.3873	12.2189	12.082	11.92	11.7948	11.6461	11.5109	11.3911	11.2908	11.2012	11.1143	11.0178	10.9198	10.8399	10.767	10.7031	10.6878	10.6939	10.6828	10.6612	10.6613	10.6417	10.5907	10.5855	10.5847	10.5756	10.5504	10.5847	10.597	10.6127
32254.6	17.0232	16.8363	16.6413	16.3223	15.9564	15.6456	15.3749	15.1222	14.9064	14.6555	14.4122	14.1814	13.97	13.7249	13.532	13.3027	13.0471	12.831	12.6137	12.4124	12.2438	12.1035	11.9388	11.8138	11.6642	11.525	11.4067	11.3098	11.2164	11.129	11.033	10.9343	10.8541	10.7855	10.7213	10.7085	10.7155	10.7018	10.6771	10.6797	10.6599	10.6059	10.6008	10.6007	10.5894	10.561	10.5959	10.6099	10.6242
32914.6	17.0352	16.8574	16.6626	16.3534	15.9884	15.6766	15.4035	15.1539	14.9347	14.684	14.4396	14.207	13.9908	13.7451	13.5516	13.3265	13.0712	12.8572	12.6386	12.4383	12.2671	12.1248	11.9588	11.8327	11.6802	11.541	11.4247	11.3289	11.2344	11.1464	11.05	10.95	10.8678	10.8	10.7386	10.7278	10.7345	10.7204	10.6953	10.7001	10.679	10.6236	10.6166	10.6159	10.6012	10.5709	10.6044	10.6206	10.6349
33588.2	17.0593	16.8836	16.69	16.3853	16.0168	15.7036	15.4293	15.1803	14.9611	14.7121	14.4624	14.2297	14.0116	13.7667	13.5729	13.3526	13.0968	12.8832	12.6617	12.4635	12.2885	12.146	11.9807	11.8523	11.6956	11.5601	11.4456	11.3484	11.2567	11.168	11.0704	10.969	10.8834	10.8117	10.7554	10.746	10.7506	10.7384	10.7157	10.7212	10.6985	10.6444	10.6346	10.632	10.6143	10.5844	10.6143	10.6314	10.6474
34275.5	17.0948	16.9148	16.7231	16.4155	16.0402	15.7253	15.4506	15.1993	14.9837	14.7377	14.4822	14.2515	14.0342	13.7911	13.5969	13.3802	13.1231	12.9083	12.6828	12.4867	12.3081	12.1663	12.0033	11.8722	11.7122	11.5816	11.4685	11.3683	11.2828	11.1934	11.0939	10.9917	10.9023	10.8234	10.7727	10.7638	10.7655	10.7567	10.7379	10.7424	10.7185	10.6682	10.6557	10.6506	10.6318	10.6044	10.6301	10.6455	10.6644
34976.9	17.1337	16.9461	16.7569	16.4409	16.0581	15.7413	15.467	15.2115	15.0015	14.7589	14.5007	14.2732	14.058	13.8164	13.622	13.4063	13.1478	12.9309	12.7011	12.5067	12.3256	12.1843	12.024	11.8909	11.73	11.6029	11.4907	11.3875	11.3091	11.219	11.1175	11.0148	10.9226	10.8364	10.7895	10.7811	10.7807	10.7756	10.7607	10.763	10.7388	10.6928	10.6785	10.6711	10.6529	10.6296	10.652	10.6648	10.6864
35692.6	17.1635	16.969	16.7827	16.4575	16.0695	15.7518	15.4779	15.2178	15.013	14.773	14.5167	14.2918	14.0786	13.8373	13.6427	13.4249	13.1664	12.9475	12.7145	12.521	12.339	12.1968	12.0389	11.9051	11.7457	11.6198	11.5081	11.4029	11.3297	11.2384	11.1354	11.0327	10.9393	10.848	10.8026	10.7954	10.7946	10.7925	10.7802	10.781	10.7565	10.7135	10.6983	10.6892	10.6727	10.6533	10.6743	10.6855	10.7087
36423	17.1776	16.9799	16.7958	16.4648	16.0749	15.7572	15.4835	15.22	15.0182	14.7793	14.5279	14.304	14.092	13.85	13.6554	13.4329	13.1762	12.956	12.7217	12.5285	12.3471	12.2028	12.0462	11.9124	11.7561	11.6296	11.518	11.4116	11.3407	11.2478	11.144	11.0414	10.948	10.8547	10.8093	10.804	10.8037	10.8039	10.7927	10.7933	10.7679	10.7262	10.7106	10.7003	10.6853	10.6686	10.6897	10.7013	10.7251
37168.4	17.1807	16.983	16.7996	16.4668	16.0769	15.7591	15.4848	15.22	15.0191	14.7801	14.5345	14.3106	14.0989	13.8562	13.6616	13.4333	13.1797	12.9592	12.7251	12.5319	12.352	12.2046	12.0483	11.9151	11.7614	11.6334	11.5218	11.4151	11.3439	11.2494	11.1456	11.043	10.9499	10.8564	10.8105	10.8076	10.8077	10.8092	10.7983	10.8	10.7726	10.7312	10.7153	10.7044	10.6897	10.674	10.6956	10.7095	10.7335
37929	17.1807	16.9846	16.8008	16.468	16.0788	15.7611	15.4855	15.2206	15.0199	14.7803	14.5396	14.3158	14.1041	13.8612	13.6666	13.4333	13.1827	12.9623	12.7292	12.5361	12.3576	12.2072	12.0509	11.9177	11.765	11.6356	11.524	11.4174	11.345	11.2496	11.1459	11.0433	10.9502	10.8566	10.8105	10.8106	10.8107	10.8125	10.8016	10.8049	10.7744	10.733	10.7171	10.7062	10.6907	10.675	10.6967	10.7135	10.7375
38705.1	17.1808	16.9866	16.8024	16.4696	16.0815	15.7638	15.4868	15.222	15.0214	14.7807	14.5435	14.3196	14.1079	13.8649	13.6702	13.4338	13.1859	12.9656	12.734	12.5415	12.3639	12.2107	12.0544	11.9207	11.7677	11.6371	11.5257	11.4191	11.3456	11.2501	11.1464	11.0435	10.9504	10.8569	10.8106	10.8138	10.8139	10.8157	10.8049	10.8094	10.7758	10.7343	10.7185	10.7075	10.6908	10.6751	10.6969	10.7156	10.7396
39497.1	17.1821	16.989	16.8044	16.4708	16.084	15.7663	15.4881	15.2232	15.0229	14.781	14.5453	14.3212	14.1096	13.8663	13.6717	13.4341	13.1879	12.9676	12.737	12.545	12.3676	12.2128	12.0564	11.9223	11.7687	11.6377	11.5265	11.4199	11.3459	11.2504	11.1467	11.0436	10.9505	10.857	10.8106	10.8162	10.8162	10.8181	10.8072	10.8125	10.7765	10.7351	10.7193	10.7083	10.691	10.6753	10.697	10.7164	10.7404
40305.4	17.1875	16.9949	16.809	16.4723	16.0866	15.7694	15.4898	15.225	15.0247	14.7816	14.5453	14.3212	14.1096	13.8663	13.6717	13.4341	13.1883	12.968	12.7374	12.5454	12.368	12.2128	12.0564	11.9223	11.7687	11.6377	11.5265	11.4199	11.3459	11.2504	11.1467	11.0436	10.9505	10.857	10.8106	10.817	10.8171	10.8189	10.8081	10.8133	10.7765	10.7351	10.7193	10.7083	10.691	10.6753	10.697	10.7164	10.7404
41130.2	17.2009	17.0084	16.8198	16.4762	16.0915	15.7772	15.4948	15.23	15.0297	14.7857	14.5466	14.3225	14.1109	13.8678	13.672	13.4344	13.1886	12.9683	12.7375	12.5454	12.368	12.2128	12.0565	11.923	11.7694	11.6385	11.5273	11.4207	11.346	11.2512	11.1478	11.0447	10.9516	10.8581	10.8115	10.8174	10.8175	10.8193	10.8085	10.8133	10.7765	10.7351	10.7193	10.7083	10.691	10.6753	10.698	10.7174	10.7414
41971.8	17.2246	17.0321	16.8403	16.4882	16.104	15.7948	15.5096	15.2432	15.0436	14.7998	14.5556	14.3304	14.1201	13.8783	13.6796	13.4425	13.1966	12.9749	12.7437	12.5511	12.3736	12.2196	12.0644	11.932	11.7789	11.6483	11.5365	11.4304	11.3531	11.2594	11.1564	11.0528	10.9596	10.8661	10.8194	10.8231	10.8237	10.8246	10.8137	10.8175	10.7815	10.7402	10.7251	10.7155	10.6974	10.6813	10.7062	10.7255	10.7485
42830.7	17.2583	17.0667	16.8728	16.515	16.1308	15.8273	15.5414	15.272	15.0734	14.831	14.5814	14.353	14.146	13.9066	13.7037	13.4684	13.222	12.9978	12.7659	12.5725	12.3945	12.2423	12.0893	11.9575	11.8048	11.675	11.5621	11.4569	11.3753	11.283	11.1799	11.0747	10.9812	10.8882	10.8418	10.842	10.8445	10.8436	10.8323	10.8344	10.8003	10.7586	10.745	10.7391	10.7196	10.7025	10.7298	10.749	10.7692
43707.2	17.2997	17.1096	16.9165	16.5593	16.1736	15.8743	15.5915	15.3181	15.1204	14.8808	14.6279	14.3948	14.1917	13.9543	13.7473	13.5146	13.2672	13.0401	12.8076	12.6141	12.4346	12.2842	12.1331	12.0005	11.8471	11.7181	11.6048	11.5003	11.4148	11.324	11.2205	11.1125	11.0184	10.927	10.881	10.8775	10.8831	10.8802	10.8673	10.8675	10.8361	10.793	10.7817	10.7814	10.7608	10.7421	10.771	10.7899	10.8059
44601.6	17.3427	17.154	16.9651	16.615	16.2263	15.928	15.6508	15.3737	15.1769	14.94	14.6873	14.4489	14.2485	14.0107	13.8013	13.571	13.3224	13.0932	12.8607	12.6676	12.4863	12.3364	12.1859	12.0508	11.8951	11.7667	11.6547	11.5505	11.4632	11.3743	11.2705	11.1593	11.0648	10.9756	10.9298	10.9233	10.9314	10.9273	10.9117	10.9101	10.8817	10.8368	10.8275	10.833	10.8123	10.7916	10.8209	10.8393	10.8513
45514.3	17.3789	17.1908	17.0082	16.6673	16.2748	15.9743	15.7027	15.4229	15.2275	14.9925	14.7423	14.5	14.2992	14.0583	13.8483	13.6196	13.3702	13.1402	12.9084	12.7157	12.5328	12.3822	12.2307	12.0926	11.9336	11.8057	11.6968	11.5925	11.5061	11.4192	11.3155	11.202	11.1073	11.0204	10.9743	10.9655	10.9738	10.9701	10.9513	10.9483	10.9227	10.8765	10.8679	10.8778	10.8575	10.8348	10.8638	10.8814	10.8914
46445.7	17.4038	17.2147	17.0379	16.7038	16.3078	16.0031	15.7349	15.4541	15.2605	15.0264	14.7792	14.5349	14.3312	14.086	13.8764	13.6483	13.3986	13.1688	12.9381	12.7456	12.5617	12.4099	12.257	12.1161	11.9545	11.8269	11.7218	11.6173	11.5333	11.448	11.3446	11.2307	11.1359	11.0504	11.004	10.9937	10.9993	10.9975	10.9759	10.972	10.9487	10.902	10.8927	10.9046	10.8849	10.8608	10.8892	10.9062	10.9165
47396.1	17.4168	17.2259	17.0525	16.7209	16.3227	16.014	15.7468	15.4663	15.2742	15.0403	14.7948	14.5501	14.3427	14.0945	13.8853	13.6572	13.4078	13.1784	12.9484	12.7558	12.5716	12.419	12.2652	12.1229	11.9602	11.8327	11.7303	11.6257	11.5435	11.4591	11.356	11.243	11.1482	11.0633	11.0165	11.0056	11.0077	11.008	10.9848	10.9806	10.9586	10.9119	10.9011	10.9134	10.8941	10.8693	10.8973	10.914	10.9257
48366	17.4234	17.2309	17.0582	16.725	16.3264	16.0157	15.7485	15.4687	15.2773	15.0434	14.798	14.5532	14.3434	14.0945	13.8853	13.6572	13.4079	13.1786	12.9486	12.756	12.5718	12.4191	12.2652	12.1229	11.9602	11.8327	11.7313	11.6266	11.5448	11.4604	11.3573	11.2455	11.1507	11.0658	11.0191	11.0081	11.0081	11.0093	10.9858	10.9816	10.9599	10.9133	10.9015	10.9139	10.8946	10.8695	10.8974	10.9142	10.9266
49355.7	17.4309	17.2366	17.0627	16.7256	16.327	16.0157	15.7485	15.4692	15.2778	15.0438	14.7984	14.5536	14.3434	14.0945	13.8853	13.6572	13.4079	13.1786	12.9486	12.756	12.5718	12.4191	12.2652	12.1229	11.9603	11.8328	11.7313	11.6267	11.5448	11.4604	11.3573	11.246	11.1511	11.0663	11.0195	11.0086	11.0081	11.0093	10.9858	10.9816	10.9599	10.9133	10.9015	10.9139	10.8946	10.8695	10.8974	10.9142	10.9266
50365.7	17.4426	17.2455	17.0699	16.7276	16.3281	16.0168	15.7495	15.4701	15.2778	15.0441	14.7986	14.5538	14.3437	14.0947	13.8853	13.6572	13.4079	13.1786	12.9486	12.756	12.5718	12.4191	12.2652	12.123	11.9603	11.8328	11.7314	11.6267	11.5448	11.4604	11.3573	11.246	11.1512	11.0663	11.0195	11.0086	11.0081	11.0093	10.986	10.9817	10.96	10.9134	10.9016	10.9139	10.8946	10.8695	10.8974	10.9142	10.9266
51396.4	17.4569	17.257	17.0797	16.732	16.3308	16.0196	15.7516	15.4716	15.2778	15.0443	14.7989	14.5541	14.344	14.095	13.8855	13.6574	13.408	13.1786	12.9487	12.756	12.5718	12.4191	12.2652	12.123	11.9603	11.8328	11.7314	11.6267	11.5448	11.4604	11.3573	11.246	11.1512	11.0663	11.0195	11.0086	11.0082	11.0094	10.9862	10.9819	10.9603	10.9137	10.9018	10.9139	10.8946	10.8695	10.8974	10.9142	10.9268
52448.1	17.4685	17.2667	17.0889	16.7365	16.3341	16.0228	15.754	15.4726	15.2778	15.0443	14.7989	14.5541	14.344	14.095	13.8855	13.6576	13.4082	13.1788	12.9489	12.7562	12.5718	12.4191	12.2652	12.123	11.9603	11.8328	11.7314	11.6267	11.5448	11.4604	11.3573	11.2462	11.1514	11.0665	11.0197	11.0087	11.0082	11.0099	10.9867	10.9825	10.9608	10.9142	10.9018	10.9139	10.8946	10.8695	10.8974	10.9142	10.9268
53521.4	17.476	17.2736	17.0972	16.7416	16.3396	16.0272	15.7573	15.4737	15.279	15.0449	14.7995	14.5547	14.344	14.095	13.8855	13.6591	13.4098	13.1804	12.9504	12.758	12.572	12.4195	12.2655	12.1236	11.9606	11.8335	11.7329	11.6282	11.5461	11.4624	11.3591	11.2482	11.1534	11.0685	11.0213	11.0102	11.0084	11.0121	10.9889	10.9844	10.9627	10.9166	10.9024	10.9144	10.8951	10.87	10.8977	10.9148	10.9276
54616.6	17.4839	17.2812	17.107	16.7505	16.3507	16.0344	15.764	15.4791	15.2843	15.0492	14.8043	14.5591	14.3461	14.0979	13.888	13.6645	13.4148	13.1854	12.9547	12.7627	12.5741	12.4226	12.2688	12.1278	11.9642	11.8379	11.7389	11.635	11.5526	11.4709	11.3669	11.2559	11.1608	11.0752	11.0269	11.0158	11.0115	11.0178	10.9954	10.9895	10.9672	10.9227	10.9054	10.9168	10.8977	10.8722	10.8995	10.9175	10.9307
55734.2	17.4985	17.2948	17.1226	16.7674	16.3708	16.0483	15.7784	15.4938	15.2975	15.061	14.8178	14.5715	14.3537	14.1076	13.8971	13.6762	13.4255	13.1974	12.9653	12.7735	12.5824	12.4331	12.2789	12.1392	11.9749	11.8497	11.7523	11.65	11.5679	11.4887	11.3835	11.272	11.1768	11.0886	11.0388	11.0282	11.0213	11.0293	11.0094	11.0013	10.9774	10.9346	10.9147	10.9242	10.9057	10.8796	10.9064	10.9254	10.9391
56874.8	17.5258	17.3195	17.1479	16.7953	16.401	16.0725	15.8045	15.5216	15.3218	15.0839	14.8422	14.5943	14.3701	14.1263	13.9157	13.6959	13.4432	13.2181	12.985	12.7926	12.6002	12.454	12.2982	12.1594	11.9948	11.8705	11.7731	11.6729	11.5918	11.5144	11.4084	11.2961	11.2011	11.1094	11.0582	11.0483	11.0409	11.0483	11.0328	11.0225	10.9962	10.954	10.9333	10.9395	10.922	10.8955	10.9217	10.9416	10.9554
58038.6	17.5668	17.3555	17.1826	16.8324	16.4372	16.1057	15.8409	15.5595	15.3549	15.1156	14.8729	14.6233	14.394	14.151	13.941	13.7207	13.4658	13.2447	13.0114	12.8177	12.6257	12.4822	12.3238	12.185	12.021	11.8969	11.7972	11.699	11.6187	11.5415	11.4354	11.3228	11.2283	11.1339	11.0819	11.0725	11.0675	11.0722	11.0617	11.0503	11.0218	10.9786	10.9593	10.9616	10.9451	10.9194	10.9444	10.9649	10.9788
59226.3	17.6173	17.3985	17.2228	16.8734	16.474	16.1429	15.8819	15.601	15.3909	15.1506	14.9033	14.6522	14.4212	14.1768	13.9679	13.7466	13.49	13.2717	13.0398	12.8444	12.6538	12.5116	12.3501	12.2104	12.0476	11.923	11.8194	11.7225	11.6422	11.5635	11.4585	11.3461	11.2518	11.1573	11.105	11.0955	11.0947	11.0958	11.0895	11.0788	11.0491	11.0043	10.9877	10.9861	10.9705	10.9468	10.97	10.9915	11.0058
60438.2	17.6685	17.4417	17.2627	16.9124	16.5071	16.1785	15.9212	15.6392	15.4246	15.1836	14.929	14.6767	14.4474	14.2	13.9924	13.7707	13.5134	13.2958	13.0661	12.869	12.6799	12.5372	12.3729	12.2318	12.0701	11.9447	11.8368	11.7407	11.6594	11.5787	11.4753	11.3635	11.269	11.1764	11.1241	11.1137	11.1168	11.1149	11.1112	11.1026	11.0728	11.0272	11.0134	11.0087	10.9935	10.9728	10.9937	11.0169	11.032
61675	17.7089	17.4755	17.2936	16.9417	16.5311	16.205	15.9507	15.6673	15.4498	15.2086	14.9469	14.6937	14.4674	14.2166	14.0104	13.7887	13.5315	13.3129	13.0855	12.8871	12.6988	12.5546	12.3887	12.246	12.085	11.9588	11.8479	11.7523	11.6697	11.5873	11.4854	11.3741	11.2791	11.189	11.1364	11.1249	11.1303	11.1268	11.1243	11.1181	11.0887	11.0432	11.0313	11.025	11.0096	10.9919	11.011	11.0359	11.0518
62937.1	17.7298	17.4926	17.309	16.9556	16.5423	16.2176	15.9649	15.6808	15.4621	15.2207	14.9548	14.7011	14.477	14.2239	14.0184	13.797	13.5403	13.3204	13.0944	12.8954	12.7073	12.5616	12.395	12.2513	12.0905	11.964	11.8518	11.7565	11.6732	11.59	11.489	11.3778	11.2824	11.1938	11.1411	11.1288	11.135	11.1312	11.1289	11.1241	11.0951	11.0501	11.0387	11.0318	11.0161	11.0006	11.0188	11.0448	11.0614
64225	17.7344	17.4961	17.3117	16.9578	16.5439	16.2197	15.9675	15.6834	15.4645	15.2231	14.9559	14.7021	14.4787	14.2249	14.0194	13.798	13.5417	13.3211	13.0955	12.8965	12.7084	12.562	12.3954	12.2513	12.0905	11.964	11.8518	11.7565	11.6732	11.59	11.4891	11.3779	11.2825	11.1942	11.1415	11.1291	11.1353	11.1316	11.1293	11.1246	11.0956	11.0508	11.0392	11.0323	11.0164	11.0018	11.0198	11.0462	11.0631
65539.3	17.7344	17.4961	17.3117	16.9578	16.5439	16.2197	15.9675	15.6834	15.4645	15.2231	14.9559	14.7021	14.4787	14.2249	14.0194	13.798	13.5417	13.3211	13.0955	12.8965	12.7084	12.562	12.3954	12.2513	12.0905	11.964	11.8518	11.7565	11.6732	11.59	11.4891	11.3779	11.2825	11.1942	11.1415	11.1291	11.1353	11.1316	11.1293	11.1246	11.0956	11.0508	11.0392	11.0323	11.0164	11.0018	11.0198	11.0462	11.0631
66880.4	17.7344	17.4979	17.3144	16.9605	16.547	16.2228	15.9692	15.6841	15.4652	15.2234	14.9571	14.7032	14.4795	14.2257	14.021	13.7987	13.5424	13.3218	13.0962	12.8965	12.7084	12.562	12.3954	12.2513	12.0907	11.9642	11.852	11.7568	11.6735	11.5902	11.4892	11.3781	11.2825	11.1942	11.1415	11.1291	11.1353	11.1316	11.1293	11.1246	11.0956	11.0508	11.0395	11.0326	11.0167	11.0021	11.0204	11.0465	11.0634
68249	17.7386	17.5063	17.3237	16.97	16.5577	16.233	15.9757	15.6896	15.4706	15.2273	14.9628	14.709	14.4846	14.2322	14.0293	13.8046	13.5485	13.328	13.1015	12.8998	12.7112	12.5651	12.3982	12.254	12.0941	11.9677	11.8544	11.7599	11.6765	11.5922	11.4917	11.3811	11.2843	11.196	11.1438	11.1315	11.1372	11.134	11.1313	11.1264	11.0973	11.0525	11.042	11.0356	11.0196	11.0044	11.0242	11.0491	11.0664
69645.6	17.7495	17.5235	17.3399	16.9858	16.5753	16.2498	15.9874	15.7019	15.4834	15.2381	14.9759	14.7223	14.4969	14.2478	14.0471	13.8189	13.5633	13.3427	13.114	12.9093	12.7195	12.5738	12.4066	12.2621	12.1036	11.9776	11.8622	11.7683	11.6843	11.5985	11.4993	11.3895	11.2905	11.2027	11.1515	11.1392	11.1434	11.1413	11.1374	11.1321	11.1031	11.0584	11.0488	11.0438	11.0274	11.0103	11.033	11.0557	11.0741
71070.8	17.768	17.5487	17.3619	17.0061	16.5968	16.2712	16.0034	15.7211	15.5043	15.2577	14.9975	14.744	14.518	14.2729	14.0735	13.8417	13.587	13.3657	13.1341	12.9261	12.7353	12.5894	12.4227	12.2782	12.1213	11.996	11.8785	11.7838	11.6988	11.6114	11.5135	11.4045	11.3035	11.2165	11.1667	11.1542	11.1559	11.155	11.1493	11.1435	11.1156	11.071	11.0615	11.0584	11.0413	11.0208	11.0473	11.0675	11.0876
72525.2	17.7905	17.5767	17.3854	17.027	16.6175	16.2925	16.0205	15.7433	15.5291	15.2828	15.0235	14.7706	14.5446	14.3026	14.1027	13.8685	13.6142	13.3911	13.1572	12.9464	12.756	12.6093	12.4442	12.3	12.1451	12.0202	11.9017	11.8046	11.718	11.6296	11.5317	11.423	11.3217	11.2355	11.1867	11.1735	11.1722	11.1723	11.1649	11.159	11.1329	11.0888	11.078	11.0765	11.0582	11.034	11.0638	11.0824	11.1046
74009.3	17.8091	17.5989	17.4034	17.0427	16.632	16.3073	16.0333	15.7614	15.55	15.3055	15.0463	14.7944	14.5688	14.3277	14.1261	13.8911	13.6364	13.4104	13.1759	12.9631	12.7754	12.6274	12.4646	12.3213	12.1683	12.0432	11.9248	11.8244	11.7361	11.6473	11.5477	11.4388	11.339	11.2528	11.2045	11.1904	11.1865	11.1868	11.1788	11.173	11.1493	11.1058	11.0928	11.0919	11.072	11.0449	11.0767	11.0952	11.1192
75523.8	17.8186	17.61	17.4123	17.0501	16.6384	16.3136	16.039	15.7709	15.5617	15.3193	15.0599	14.8095	14.5847	14.3428	14.1393	13.9046	13.6486	13.4197	13.1858	12.972	12.7884	12.6394	12.4787	12.3363	12.1848	12.0586	11.9412	11.8378	11.7481	11.6593	11.5569	11.4473	11.3498	11.2631	11.2152	11.2001	11.1946	11.1949	11.1869	11.1814	11.1595	11.1166	11.1013	11.1007	11.0792	11.0505	11.083	11.1024	11.1276
77069.2	17.8206	17.6125	17.4143	17.0516	16.6394	16.3145	16.0399	15.7735	15.5654	15.3242	15.0647	14.8157	14.5917	14.3487	14.1443	13.9101	13.6527	13.4217	13.1886	12.9745	12.7949	12.6454	12.4858	12.3443	12.1933	12.0655	11.949	11.8441	11.7535	11.6647	11.5599	11.4498	11.3539	11.2667	11.2189	11.2034	11.1973	11.1974	11.1897	11.1843	11.1632	11.1207	11.1039	11.1035	11.0811	11.052	11.0844	11.1049	11.1304
78646.3	17.8206	17.6125	17.4143	17.0516	16.6394	16.3145	16.0399	15.7737	15.5658	15.3246	15.0651	14.8168	14.5932	14.3501	14.1457	13.9115	13.6534	13.4217	13.1886	12.9745	12.7974	12.6479	12.4885	12.3473	12.1963	12.0669	11.9507	11.8456	11.7546	11.6658	11.5601	11.4498	11.3543	11.2671	11.2193	11.2038	11.1977	11.1978	11.19	11.1846	11.1636	11.121	11.1039	11.1036	11.0813	11.0522	11.0845	11.1053	11.1307
80255.7	17.8206	17.6125	17.4143	17.0516	16.6394	16.3145	16.0399	15.7737	15.5658	15.3246	15.0651	14.8169	14.5933	14.3502	14.1458	13.9116	13.6535	13.4217	13.1886	12.9745	12.7981	12.6486	12.4892	12.348	12.197	12.0669	11.9507	11.8456	11.7546	11.6658	11.5601	11.4498	11.3543	11.2671	11.2193	11.2038	11.1977	11.1978	11.19	11.1846	11.1636	11.121	11.1039	11.1036	11.0813	11.0522	11.0845	11.1053	11.1307
81898	17.8206	17.6125	17.4143	17.0516	16.6394	16.3145	16.0399	15.7737	15.5658	15.3246	15.0651	14.8169	14.5933	14.3502	14.1458	13.9116	13.6535	13.4217	13.1886	12.9745	12.7981	12.6486	12.4892	12.348	12.197	12.0669	11.9507	11.8456	11.7546	11.6658	11.5601	11.4498	11.3543	11.2671	11.2193	11.2038	11.1977	11.1978	11.19	11.1846	11.1636	11.121	11.1039	11.1036	11.0813	11.0522	11.0845	11.1053	11.1307
83573.9	17.8206	17.6125	17.4143	17.0516	16.6394	16.3145	16.0399	15.7737	15.5658	15.3246	15.0651	14.8169	14.5933	14.3502	14.1458	13.9116	13.6535	13.4217	13.1886	12.9745	12.7981	12.6486	12.4892	12.348	12.197	12.0669	11.9507	11.8456	11.7546	11.6658	11.5601	11.4498	11.3543	11.2671	11.2193	11.2038	11.1977	11.1978	11.19	11.1846	11.1636	11.121	11.1039	11.1036	11.0813	11.0522	11.0845	11.1053	11.1307
85284.1	17.8206	17.6128	17.4146	17.0518	16.6397	16.3148	16.0399	15.7737	15.5658	15.3246	15.0651	14.8169	14.5933	14.3502	14.1458	13.9116	13.6535	13.4217	13.1886	12.9745	12.7981	12.6486	12.4892	12.348	12.197	12.0669	11.9507	11.8456	11.7546	11.6658	11.5601	11.4498	11.3543	11.2671	11.2193	11.2038	11.1977	11.1978	11.19	11.1846	11.1636	11.121	11.1039	11.1036	11.0813	11.0522	11.0845	11.1053	11.1307
87029.3	17.8208	17.6142	17.4157	17.053	16.6407	16.3158	16.0399	15.7737	15.5658	15.3246	15.0651	14.817	14.5935	14.3503	14.146	13.9122	13.6539	13.4222	13.189	12.9749	12.7981	12.6486	12.4892	12.348	12.1971	12.067	11.9508	11.8456	11.755	11.6662	11.5605	11.4503	11.3548	11.2672	11.2194	11.2039	11.1977	11.1979	11.1901	11.1851	11.164	11.1215	11.1042	11.104	11.0813	11.0522	11.0845	11.1053	11.1307
88810.2	17.8212	17.6165	17.4175	17.0548	16.6423	16.3173	16.0399	15.7737	15.5658	15.3246	15.0651	14.8172	14.5937	14.3506	14.1462	13.9132	13.6547	13.4229	13.1898	12.9757	12.7982	12.6487	12.4893	12.3481	12.1971	12.0671	11.9509	11.8458	11.7557	11.6669	11.5612	11.4511	11.3556	11.2675	11.2197	11.204	11.1977	11.1981	11.1903	11.186	11.1649	11.1223	11.1049	11.1047	11.0813	11.0522	11.0845	11.1053	11.1308
90627.6	17.8216	17.6183	17.419	17.0563	16.6436	16.3186	16.0399	15.7737	15.5658	15.3246	15.0651	14.8177	14.5942	14.3511	14.1467	13.9142	13.6552	13.4234	13.1903	12.9762	12.7982	12.6487	12.4893	12.3481	12.1971	12.0671	11.9509	11.8458	11.7561	11.6673	11.5617	11.4516	11.3562	11.2676	11.2198	11.2041	11.1978	11.1982	11.1904	11.1869	11.1659	11.1233	11.1058	11.1055	11.0813	11.0522	11.0845	11.1053	11.1308
92482.1	17.8216	17.619	17.4195	17.0568	16.6441	16.3191	16.0399	15.7737	15.5658	15.3246	15.0651	14.8186	14.5951	14.352	14.1476	13.9152	13.6553	13.4236	13.1904	12.9763	12.7982	12.6487	12.4893	12.3481	12.1971	12.0671	11.9509	11.8458	11.7563	11.6674	11.5618	11.4517	11.3563	11.2676	11.2198	11.2041	11.1978	11.1982	11.1905	11.1878	11.1667	11.1242	11.1066	11.1063	11.0813	11.0522	11.0845	11.1053	11.131
94374.6	17.8216	17.619	17.4195	17.0568	16.6441	16.3191	16.0399	15.7737	15.5658	15.3246	15.0651	14.8199	14.5963	14.3532	14.1488	13.9164	13.6553	13.4236	13.1904	12.9763	12.7982	12.6487	12.4893	12.3481	12.1971	12.0671	11.9509	11.8458	11.7563	11.6674	11.5619	11.4519	11.3564	11.2678	11.22	11.2041	11.1978	11.1984	11.1906	11.1885	11.1675	11.1249	11.1071	11.1069	11.0813	11.0522	11.0845	11.1053	11.1314
96305.9	17.8216	17.619	17.4195	17.0568	16.6441	16.3191	16.0399	15.7737	15.5658	15.3246	15.0651	14.8209	14.5974	14.3543	14.1499	13.9175	13.6553	13.4236	13.1904	12.9764	12.7982	12.6487	12.4893	12.3481	12.1971	12.0671	11.9509	11.8458	11.7563	11.6674	11.5622	11.4521	11.3567	11.2681	11.2203	11.2041	11.1978	11.1988	11.191	11.1891	11.1681	11.1255	11.1074	11.1072	11.0813	11.0522	11.0845	11.1053	11.1318
98276.6	17.8216	17.619	17.4195	17.0568	16.6441	16.3191	16.0399	15.7737	15.5658	15.3246	15.0651	14.8215	14.5979	14.3548	14.1504	13.918	13.6553	13.4236	13.1905	12.9764	12.7982	12.6487	12.4893	12.3481	12.1971	12.0671	11.9509	11.8458	11.7563	11.6674	11.5625	11.4524	11.357	11.2683	11.2205	11.2041	11.1978	11.199	11.1912	11.1894	11.1684	11.1258	11.1075	11.1072	11.0813	11.0522	11.0845	11.1053	11.132
100288	17.8216	17.619	17.4195	17.0568	16.6441	16.3191	16.0399	15.7737	15.5658	15.3246	15.0651	14.8215	14.5979	14.3548	14.1504	13.918	13.6553	13.4236	13.1905	12.9764	12.7982	12.6487	12.4893	12.3481	12.1971	12.0671	11.9509	11.8458	11.7563	11.6674	11.5625	11.4524	11.357	11.2684	11.2206	11.2041	11.1978	11.199	11.1912	11.1894	11.1684	11.1258	11.1075	11.1072	11.0813	11.0522	11.0845	11.1053	11.132
102340	17.8216	17.619	17.4195	17.0568	16.6441	16.3191	16.0399	15.7737	15.5658	15.3246	15.0651	14.8215	14.5979	14.3548	14.1504	13.9181	13.6554	13.4236	13.1905	12.9764	12.7982	12.6487	12.4893	12.3481	12.1971	12.0671	11.9509	11.8458	11.7563	11.6674	11.5625	11.4525	11.357	11.2684	11.2206	11.2041	11.1978	11.199	11.1912	11.1894	11.1684	11.1258	11.1075	11.1072	11.0813	11.0522	11.0845	11.1053	11.132
104434	17.8216	17.619	17.4195	17.0568	16.6441	16.3191	16.0399	15.7737	15.5658	15.3246	15.0651	14.8215	14.5979	14.3548	14.1504	13.9181	13.6554	13.4236	13.1905	12.9764	12.7982	12.6487	12.4893	12.3481	12.1971	12.0671	11.9509	11.8458	11.7563	11.6674	11.5625	11.4525	11.357	11.2684	11.2206	11.2041	11.1978	11.199	11.1912	11.1894	11.1684	11.1258	11.1075	11.1072	11.0813	11.0522	11.0845	11.1053	11.132
[truncated: 308 more columns]
